# Supplementary material for: Innate Immune Response of Human Alveolar Macrophages during Influenza A Infection
Source: PLoS One. 2012 Mar 2;7(3):e29879. doi: 10.1371/journal.pone.0029879 (PMC3292548; doi:10.1371/journal.pone.0029879)
Supplement: Data S1 — Human AM from 3 non-smoking donors were isolated, cultured, and infected by PR/8 virus at MOI of 0.5. The gene profiling of infected and non-infected cells at 4 and 24 hpi from each donor was examined by microarray experiments using Affymetrix HG-U133 Plus 2.0 chips (Affymetrix, Santa Clara, CA). The filtered gene list was generated as described in the Section of Methods and Materials. The data show probe ID, gene symbol, gene name, and fold change at 4 and 24 hpi. Red indicates similar results from multiple probes for the same gene, and the probe ID is the representative probe ID from several probes. (XLS) [file pone.0029879.s001.xls]

## Sheet: Sheet1
4h-gene list					24h gene list
	Probe	Symbol	Description	fold-change		Probe	Symbol	Description	fold-change
	208173_at	IFNB1	interferon, beta 1, fibroblast	6939.53		204533_at	CXCL10	chemokine (C-X-C motif) ligand 10	2900.23
	204698_at	ISG20	interferon stimulated exonuclease gene 20kDa	1916.06		209278_s_at	TFPI2	tissue factor pathway inhibitor 2	1003.14
	207932_at	IFNA8	interferon, alpha 8	977.981		211122_s_at	CXCL11	chemokine (C-X-C motif) ligand 11	986.88
	210163_at	CXCL11	chemokine (C-X-C motif) ligand 11	849.786		229964_at	C9orf152	chromosome 9 open reading frame 152	444.264
	211145_x_at	IFNA21	interferon, alpha 21	737.138		233092_s_at	DKFZP434B061	DKFZP434B061 protein	398.074
	208344_x_at	IFNA13	interferon, alpha 13	641.727		209955_s_at	FAP	fibroblast activation protein, alpha	384.2
	207964_x_at	IFNA4	interferon, alpha 4	601.865		227347_x_at	HES4	hairy and enhancer of split 4 (Drosophila)	368.37
	208375_at	IFNA1	interferon, alpha 1	502.344		214022_s_at	IFITM2	interferon induced transmembrane protein 2 (1-8D)	352.534
	218717_s_at	LEPREL1	leprecan-like 1	369.61		222068_s_at	LRRC50	leucine rich repeat containing 50	339.264
	208259_x_at	IFNA7	interferon, alpha 7	316.653		227662_at	SYNPO2	synaptopodin 2	333.701
	1557557_at	MATN1	matrilin 1, cartilage matrix protein	316.127		203915_at	CXCL9	chemokine (C-X-C motif) ligand 9	305.093
	210712_at	LDHAL6B	lactate dehydrogenase A-like 6B	301.441		1552995_at	IL27	interleukin 27	299.116
	221241_s_at	BCL2L14	BCL2-like 14 (apoptosis facilitator)	285.622		226771_at	ATP8B2	ATPase, Class I, type 8B, member 2	236.291
	1552917_at	IL29	interleukin 29 (interferon, lambda 1)	251.482		206632_s_at	APOBEC3B	apolipoprotein B mRNA editing enzyme, catalytic polypeptide-like 3B	230.19
	240287_at	LOC730249	similar to Immune-responsive protein 1	224.415		1552915_at	IL28A	interleukin 28A (interferon, lambda 2)	227.338
	1555759_a_at	CCL5	chemokine (C-C motif) ligand 5	223.158		1405_i_at	CCL5	chemokine (C-C motif) ligand 5	224.574
	206422_at	GCG	glucagon	218.496		221241_s_at	BCL2L14	BCL2-like 14 (apoptosis facilitator)	195.141
	227347_x_at	HES4	hairy and enhancer of split 4 (Drosophila)	189.287		205289_at	BMP2	bone morphogenetic protein 2	191.45
	222068_s_at	LRRC50	leucine rich repeat containing 50	168.448		209655_s_at	TMEM47	transmembrane protein 47	169.587
	219011_at	PLEKHA4	pleckstrin homology domain containing, family A (phosphoinositide binding specific) member 4	154.956		214597_at	SSTR2	somatostatin receptor 2	168.795
	202688_at	TNFSF10	tumor necrosis factor (ligand) superfamily, member 10	125.732		208375_at	IFNA1	interferon, alpha 1	167.24
	209955_s_at	FAP	fibroblast activation protein, alpha	124.601		1552917_at	IL29	interleukin 29 (interferon, lambda 1)	135.388
	1553378_a_at	C17orf66	chromosome 17 open reading frame 66	124.369		201601_x_at	IFITM1	interferon induced transmembrane protein 1 (9-27)	133.089
	211405_x_at	IFNA17	interferon, alpha 17	122.344		33304_at	ISG20	interferon stimulated exonuclease gene 20kDa	107.927
	210029_at	INDO	indoleamine-pyrrole 2,3 dioxygenase	120.816		240287_at	LOC730249	similar to Immune-responsive protein 1	95.7822
	211267_at	HESX1	HESX homeobox 1	91.6519		1561738_at	GBP1	guanylate binding protein 1, interferon-inducible, 67kDa	91.1537
	203915_at	CXCL9	chemokine (C-X-C motif) ligand 9	90.898		222050_at	FXR2	fragile X mental retardation, autosomal homolog 2	90.869
	229915_at	FAM26F	family with sequence similarity 26, member F	88.0244		224225_s_at	ETV7	ets variant gene 7 (TEL2 oncogene)	89.9923
	209278_s_at	TFPI2	tissue factor pathway inhibitor 2	81.4772		206337_at	CCR7	chemokine (C-C motif) receptor 7	89.076
	206877_at	MXD1	MAX dimerization protein 1	80.8486		213797_at	RSAD2	radical S-adenosyl methionine domain containing 2	88.866
	209795_at	CD69	CD69 molecule	70.2678		1552609_s_at	IL28B	interleukin 28B (interferon, lambda 3)	85.293
	217502_at	IFIT2	interferon-induced protein with tetratricopeptide repeats 2	63.0956		210029_at	INDO	indoleamine-pyrrole 2,3 dioxygenase	78.9013
	204286_s_at	PMAIP1	phorbol-12-myristate-13-acetate-induced protein 1	59.916		217502_at	IFIT2	interferon-induced protein with tetratricopeptide repeats 2	70.4623
	216565_x_at	LOC391020	interferon induced transmembrane protein pseudogene	56.3107		211267_at	HESX1	HESX homeobox 1	68.8396
	203153_at	IFIT1	interferon-induced protein with tetratricopeptide repeats 1	54.1
	219364_at	DHX58	DEXH (Asp-Glu-X-His) box polypeptide 58	53.4846		202687_s_at	TNFSF10	tumor necrosis factor (ligand) superfamily, member 10	67.0724
	235574_at	GBP4	guanylate binding protein 4	53.2651		205207_at	IL6	interleukin 6 (interferon, beta 2)	66.6149
	209656_s_at	TMEM47	transmembrane protein 47	53.2626		204286_s_at	PMAIP1	phorbol-12-myristate-13-acetate-induced protein 1	66.4323
	204533_at	CXCL10	chemokine (C-X-C motif) ligand 10	51.4284		208451_s_at	C4A	complement component 4A (Rodgers blood group)	64.924
	242625_at	RSAD2	radical S-adenosyl methionine domain containing 2	51.4102		208344_x_at	IFNA13	interferon, alpha 13	64.2739
	220059_at	STAP1	signal transducing adaptor family member 1	49.8201		231303_at	C21orf42	chromosome 21 open reading frame 42	63.6563
	230183_at			48.6017		211786_at	TNFRSF9	tumor necrosis factor receptor superfamily, member 9	60.5961
	205483_s_at	ISG15	ISG15 ubiquitin-like modifier	45.0435		203726_s_at	LAMA3	laminin, alpha 3	60.5526
	1552995_at	IL27	interleukin 27	40.2154		200884_at	CKB	creatine kinase, brain	55.7218
	201995_at	EXT1	exostoses (multiple) 1	40.0615		205660_at	OASL	2'-5'-oligoadenylate synthetase-like	53.0319
	226279_at	PRSS23	protease, serine, 23	39.8889		206181_at	SLAMF1	signaling lymphocytic activation molecule family member 1	52.3315
	1552309_a_at	NEXN	nexilin (F actin binding protein)	38.3394		244583_at	HCK	hemopoietic cell kinase	51.9104
	219211_at	USP18	ubiquitin specific peptidase 18	37.7458		200644_at	MARCKSL1	MARCKS-like 1	50.8207
	219863_at	HERC5	hect domain and RLD 5	37.218		205476_at	CCL20	chemokine (C-C motif) ligand 20	46.7793
	205207_at	IL6	interleukin 6 (interferon, beta 2)	36.9296		213693_s_at	MUC1	mucin 1, cell surface associated	46.6537
	210770_s_at	CACNA1A	calcium channel, voltage-dependent, P/Q type, alpha 1A subunit	34.4513		205330_at	MN1	meningioma (disrupted in balanced translocation) 1	46.1796
	206932_at	CH25H	cholesterol 25-hydroxylase	33.6086		244293_at			43.3356
	209829_at	C6orf32	chromosome 6 open reading frame 32	31.7013		228835_at			41.2187
	240103_at			30.5873		205599_at	TRAF1	TNF receptor-associated factor 1	40.1193
	210797_s_at	OASL	2'-5'-oligoadenylate synthetase-like	30.1575		205483_s_at	ISG15	ISG15 ubiquitin-like modifier	39.5549
	238581_at	GBP5	guanylate binding protein 5	28.6389		223887_at	GPR132	G protein-coupled receptor 132	39.0051
	204747_at	IFIT3	interferon-induced protein with tetratricopeptide repeats 3	27.4895		203851_at	IGFBP6	insulin-like growth factor binding protein 6	38.6195
	227099_s_at	LOC387763	hypothetical LOC387763	27.1181		205013_s_at	ADORA2A	adenosine A2a receptor	36.3742
	228230_at	PRIC285	peroxisomal proliferator-activated receptor A interacting complex 285	26.9422		203592_s_at	FSTL3	follistatin-like 3 (secreted glycoprotein)	35.519
	214038_at	CCL8	chemokine (C-C motif) ligand 8	26.8696		204621_s_at	NR4A2	nuclear receptor subfamily 4, group A, member 2	35.0476
	1555912_at	ST7OT1	ST7 overlapping transcript 1 (antisense non-coding RNA)	25.8381		232593_at	LINCR	likely ortholog of mouse lung-inducible Neutralized-related C3HC4 RING domain protein	34.6542
	233092_s_at	DKFZP434B061	DKFZP434B061 protein	23.7758		228967_at	EIF1	eukaryotic translation initiation factor 1	33.8872
	1554997_a_at	PTGS2	prostaglandin-endoperoxide synthase 2 (prostaglandin G/H synthase and cyclooxygenase)	22.8422		239146_at	CLDND1	claudin domain containing 1	33.8763
	1559754_at	LTB	lymphotoxin beta (TNF superfamily, member 3)	22.1929		219211_at	USP18	ubiquitin specific peptidase 18	32.161
	230511_at	CREM	cAMP responsive element modulator	21.2974		211743_s_at	PRG2	proteoglycan 2, bone marrow (natural killer cell activator, eosinophil granule major basic protein)	30.8914
	227195_at	ZNF503	zinc finger protein 503	21.194		235699_at	REM2	RAS (RAD and GEM)-like GTP binding 2	30.1019
	214022_s_at	IFITM2	interferon induced transmembrane protein 2 (1-8D)	20.3582		204748_at	PTGS2	prostaglandin-endoperoxide synthase 2 (prostaglandin G/H synthase and cyclooxygenase)	29.6769
	227877_at	C5orf39	chromosome 5 open reading frame 39	20.248		231963_at			29.502
	242386_x_at			19.8159		1559125_at	MAZ	MYC-associated zinc finger protein (purine-binding transcription factor)	28.638
	201601_x_at	IFITM1	interferon induced transmembrane protein 1 (9-27)	19.6784		243299_at	VRK2	vaccinia related kinase 2	28.589
	220104_at	ZC3HAV1	zinc finger CCCH-type, antiviral 1	19.6776		1559509_at	PABPC1	poly(A) binding protein, cytoplasmic 1	28.0448
	206513_at	AIM2	absent in melanoma 2	19.6207		205767_at	EREG	epiregulin	27.6179
	205569_at	LAMP3	lysosomal-associated membrane protein 3	19.5065		226279_at	PRSS23	protease, serine, 23	27.0199
	218943_s_at	DDX58	DEAD (Asp-Glu-Ala-Asp) box polypeptide 58	19.2634		228230_at	PRIC285	peroxisomal proliferator-activated receptor A interacting complex 285	26.8087
	214453_s_at	IFI44	interferon-induced protein 44	18.75		1556072_at	C22orf37	chromosome 22 open reading frame 37	26.3909
	227525_at	GLCCI1	glucocorticoid induced transcript 1	18.6863		213497_at	ABTB2	ankyrin repeat and BTB (POZ) domain containing 2	25.6735
	228439_at	BATF2	basic leucine zipper transcription factor, ATF-like 2	18.634		230170_at	OSM	oncostatin M	25.529
	219684_at	RTP4	receptor (chemosensory) transporter protein 4	17.6552		207113_s_at	TNF	tumor necrosis factor (TNF superfamily, member 2)	25.0241
	210652_s_at	C1orf34	chromosome 1 open reading frame 34	17.458		206881_s_at	LILRA3	leukocyte immunoglobulin-like receptor, subfamily A (without TM domain), member 3	25.0157
	218319_at	PELI1	pellino homolog 1 (Drosophila)	17.2987		206187_at	PTGIR	prostaglandin I2 (prostacyclin) receptor (IP)	24.4331
	241462_at			17.0177		227370_at	KIAA1946	KIAA1946	24.1825
	223298_s_at	NT5C3	5'-nucleotidase, cytosolic III	16.6554		240103_at			23.8878
	218883_s_at	MLF1IP	MLF1 interacting protein	16.6041		201564_s_at	FSCN1	fascin homolog 1, actin-bundling protein (Strongylocentrotus purpuratus)	23.8293
	230380_at	THAP2	THAP domain containing, apoptosis associated protein 2	16.0648		242790_at	SNF8	SNF8, ESCRT-II complex subunit, homolog (S. cerevisiae)	22.862
	218665_at	FZD4	frizzled homolog 4 (Drosophila)	15.7734		203510_at	MET	met proto-oncogene (hepatocyte growth factor receptor)	22.7332
	1570541_s_at	LOC729936	similar to guanylate binding protein 3	15.3152		229437_at	BIC	BIC transcript	22.7171
	219584_at	PLA1A	phospholipase A1 member A	15.1032		1554057_at	LOC645676	hypothetical LOC645676	22.3634
	204622_x_at	NR4A2	nuclear receptor subfamily 4, group A, member 2	15.0231		221582_at	HIST3H2A	histone cluster 3, H2a	22.235
	1558167_a_at	MGC16275	hypothetical protein MGC16275	14.7632		1569095_at	LOC731424	hypothetical protein LOC731424	21.8338
	201215_at	PLS3	plastin 3 (T isoform)	14.2009		202708_s_at	HIST2H2BE	histone cluster 2, H2be	21.8116
	228531_at	SAMD9	sterile alpha motif domain containing 9	14.0552		235522_at	CLEC2D	C-type lectin domain family 2, member D	21.7151
	206337_at	CCR7	chemokine (C-C motif) receptor 7	13.9802		219863_at	HERC5	hect domain and RLD 5	21.326
	205539_at	AVIL	advillin	13.8137		208546_x_at	HIST1H2BH	histone cluster 1, H2bh	21.2874
	1554283_at	CCRN4L	CCR4 carbon catabolite repression 4-like (S. cerevisiae)	13.4887		219364_at	DHX58	DEXH (Asp-Glu-X-His) box polypeptide 58	21.2641
	205692_s_at	CD38	CD38 molecule	13.4017		209911_x_at	HIST1H2BD	histone cluster 1, H2bd	20.7214
	205178_s_at	RBBP6	retinoblastoma binding protein 6	13.1161		1553186_x_at	RASEF	RAS and EF-hand domain containing	20.6123
	211998_at	H3F3B	H3 histone, family 3B (H3.3B)	12.5012		228573_at			20.5417
	235061_at	PPM1K	protein phosphatase 1K (PP2C domain containing)	12.3196		238545_at	BRD7	bromodomain containing 7	20.3762
	1558111_at	MBNL1	muscleblind-like (Drosophila)	12.3011		230300_at			20.2038
	219209_at	IFIH1	interferon induced with helicase C domain 1	12.0321		205695_at	SDS	serine dehydratase	20.0265
	220266_s_at	KLF4	Kruppel-like factor 4 (gut)	11.8751		227361_at	HS3ST3B1	heparan sulfate (glucosamine) 3-O-sulfotransferase 3B1	19.9264
	225557_at	AXUD1	AXIN1 up-regulated 1	11.5014		225557_at	AXUD1	AXIN1 up-regulated 1	19.8717
	208436_s_at	IRF7	interferon regulatory factor 7	11.0896		223298_s_at	NT5C3	5'-nucleotidase, cytosolic III	19.6954
	203304_at	BAMBI	BMP and activin membrane-bound inhibitor homolog (Xenopus laevis)	10.8532		205539_at	AVIL	advillin	19.3491
	1569095_at	LOC731424	hypothetical protein LOC731424	10.4097		225699_at	SNORA9	small nucleolar RNA, H/ACA box 9	19.3417
	210145_at	PLA2G4A	phospholipase A2, group IVA (cytosolic, calcium-dependent)	10.3213		205569_at	LAMP3	lysosomal-associated membrane protein 3	18.8908
	206157_at	PTX3	pentraxin-related gene, rapidly induced by IL-1 beta	10.2176		235456_at			18.2144
	204972_at	OAS2	2'-5'-oligoadenylate synthetase 2, 69/71kDa	9.88415		237623_at	CST3	cystatin C (amyloid angiopathy and cerebral hemorrhage)	18.1984
	242388_x_at			9.74363		206110_at	HIST1H3H	histone cluster 1, H3h	18.1442
	209723_at	SERPINB9	serpin peptidase inhibitor, clade B (ovalbumin), member 9	9.70432		222802_at	EDN1	endothelin 1	18.0893
	209941_at	RIPK1	receptor (TNFRSF)-interacting serine-threonine kinase 1	9.59353		227099_s_at	LOC387763	hypothetical LOC387763	17.8202
	219517_at	ELL3	elongation factor RNA polymerase II-like 3	9.54421		238065_at	TPM3	tropomyosin 3	17.5207
	225344_at	NCOA7	nuclear receptor coactivator 7	9.49278		204103_at	CCL4	chemokine (C-C motif) ligand 4	17.5165
	237016_at	C6orf128	chromosome 6 open reading frame 128	9.45706		228213_at	H2AFJ	H2A histone family, member J	16.9858
	235292_at	FLJ32255	hypothetical protein LOC643977	9.44018		218280_x_at	HIST2H2AA3	histone cluster 2, H2aa3	16.9409
	219352_at	HERC6	hect domain and RLD 6	9.40102		213489_at	MAPRE2	microtubule-associated protein, RP/EB family, member 2	16.9137
	210001_s_at	SOCS1	suppressor of cytokine signaling 1	9.37993		202912_at	ADM	adrenomedullin	16.7062
	232593_at	LINCR	likely ortholog of mouse lung-inducible Neutralized-related C3HC4 RING domain protein	9.11749		236193_at	HIST1H2BC	histone cluster 1, H2bc	16.3945
	202086_at	MX1	myxovirus (influenza virus) resistance 1, interferon-inducible protein p78 (mouse)	9.0636		243601_at	LOC285957	hypothetical protein LOC285957	16.3263
	220655_at	TNIP3	TNFAIP3 interacting protein 3	9.05938		209803_s_at	PHLDA2	pleckstrin homology-like domain, family A, member 2	16.307
	223192_at	SLC25A28	solute carrier family 25, member 28	9.04687		205067_at	IL1B	interleukin 1, beta	16.2626
	212203_x_at	IFITM3	interferon induced transmembrane protein 3 (1-8U)	8.94769		216565_x_at	LOC391020	interferon induced transmembrane protein pseudogene	16.1055
	210397_at	DEFB1	defensin, beta 1	8.82901		210397_at	DEFB1	defensin, beta 1	16.069
	230561_s_at	RPE	ribulose-5-phosphate-3-epimerase	8.8154		208707_at	EIF5	eukaryotic translation initiation factor 5	15.9031
	209959_at	NR4A3	nuclear receptor subfamily 4, group A, member 3	8.73945		214290_s_at	HIST2H2AA4	histone cluster 2, H2aa4	15.845
	230314_at	RHOT1	ras homolog gene family, member T1	8.45542		236449_at	CSTB	cystatin B (stefin B)	15.5523
	226773_at			8.29546		239845_at			15.3396
	203358_s_at	EZH2	enhancer of zeste homolog 2 (Drosophila)	8.27529		218319_at	PELI1	pellino homolog 1 (Drosophila)	15.2486
	204929_s_at	VAMP5	vesicle-associated membrane protein 5 (myobrevin)	8.205		1557945_at	TCTE3	t-complex-associated-testis-expressed 3	15.1748
	228967_at	EIF1	eukaryotic translation initiation factor 1	8.00743		213877_x_at	TCEB2	transcription elongation factor B (SIII), polypeptide 2 (18kDa, elongin B)	15.1675
	204912_at	IL10RA	interleukin 10 receptor, alpha	8.00567		236004_at			15.0018
	204994_at	MX2	myxovirus (influenza virus) resistance 2 (mouse)	7.97986		224469_s_at	C14orf173	chromosome 14 open reading frame 173	14.8157
	244080_at			7.88268		235574_at	GBP4	guanylate binding protein 4	14.7788
	213618_at	CENTD1	centaurin, delta 1	7.86638		1554274_a_at	SSH1	slingshot homolog 1 (Drosophila)	14.6683
	215046_at	FLJ23861	hypothetical protein FLJ23861	7.83226		207375_s_at	IL15RA	interleukin 15 receptor, alpha	14.4433
	226109_at	C21orf91	chromosome 21 open reading frame 91	7.63674		236016_at			14.3298
	230036_at	SAMD9L	sterile alpha motif domain containing 9-like	7.62571		1558164_s_at	PEX13	peroxisome biogenesis factor 13	14.0937
	214710_s_at	CCNB1	cyclin B1	7.61261		230305_at			13.9016
	223834_at	CD274	CD274 molecule	7.60054		218499_at	RP6-213H19.1	serine/threonine protein kinase MST4	13.6276
	221680_s_at	ETV7	ets variant gene 7 (TEL2 oncogene)	7.56734		238581_at	GBP5	guanylate binding protein 5	13.3977
	229723_at	TAGAP	T-cell activation GTPase activating protein	7.54992		1555689_at	CD80	CD80 molecule	12.8317
	203143_s_at	KIAA0040	KIAA0040	7.37129		211916_s_at	MYO1A	myosin IA	12.6901
	204794_at	DUSP2	dual specificity phosphatase 2	7.366		209723_at	SERPINB9	serpin peptidase inhibitor, clade B (ovalbumin), member 9	12.6439
	204999_s_at	ATF5	activating transcription factor 5	7.35956		243702_at			12.5821
	207113_s_at	TNF	tumor necrosis factor (TNF superfamily, member 2)	7.29489		205692_s_at	CD38	CD38 molecule	12.5299
	203991_s_at	UTX	ubiquitously transcribed tetratricopeptide repeat, X chromosome	7.25906		208579_x_at	H2BFS	H2B histone family, member S	12.5165
	213982_s_at	RABGAP1L	RAB GTPase activating protein 1-like	7.14921		210001_s_at	SOCS1	suppressor of cytokine signaling 1	12.1224
	217371_s_at	IL15	interleukin 15	7.13719		225524_at	ANTXR2	anthrax toxin receptor 2	12.1013
	204224_s_at	GCH1	GTP cyclohydrolase 1 (dopa-responsive dystonia)	7.10117		243576_at			12.0829
	225291_at	PNPT1	polyribonucleotide nucleotidyltransferase 1	6.96159		219584_at	PLA1A	phospholipase A1 member A	11.9346
	204198_s_at	RUNX3	runt-related transcription factor 3	6.833		211998_at	H3F3B	H3 histone, family 3B (H3.3B)	11.9215
	32088_at	BLZF1	basic leucine zipper nuclear factor 1 (JEM-1)	6.74113		230154_at	WAC	WW domain containing adaptor with coiled-coil	11.8482
	203819_s_at	C7orf30	chromosome 7 open reading frame 30	6.67485		227896_at	BCCIP	BRCA2 and CDKN1A interacting protein	11.6324
	243299_at	VRK2	vaccinia related kinase 2	6.65898		230405_at	LOC441108	hypothetical gene supported by AK128882	11.5162
	202869_at	OAS1	2',5'-oligoadenylate synthetase 1, 40/46kDa	6.61381		204224_s_at	GCH1	GTP cyclohydrolase 1 (dopa-responsive dystonia)	11.3246
	219551_at	EAF2	ELL associated factor 2	6.30489		218966_at	MYO5C	myosin VC	11.1133
	222802_at	EDN1	endothelin 1	6.2993		1553099_at	TIGD1	tigger transposable element derived 1	11.0243
	222838_at	SLAMF7	SLAM family member 7	6.28761		229670_at			11.02
	225222_at	HIAT1	hippocampus abundant transcript 1	6.25156		1553713_a_at	RHEBL1	Ras homolog enriched in brain like 1	11.0149
	203820_s_at	IGF2BP3	insulin-like growth factor 2 mRNA binding protein 3	6.18988		228439_at	BATF2	basic leucine zipper transcription factor, ATF-like 2	10.9732
	203181_x_at	SRPK2	SFRS protein kinase 2	6.11938		204747_at	IFIT3	interferon-induced protein with tetratricopeptide repeats 3	10.7771
	229437_at	BIC	BIC transcript	6.09323		223834_at	CD274	CD274 molecule	10.6984
	209684_at	RIN2	Ras and Rab interactor 2	6.06568		208436_s_at	IRF7	interferon regulatory factor 7	10.6308
	235276_at	EPSTI1	epithelial stromal interaction 1 (breast)	6.03772		229072_at			10.5429
	223220_s_at	PARP9	poly (ADP-ribose) polymerase family, member 9	6.03122		208712_at	CCND1	cyclin D1	10.4842
	219519_s_at	SIGLEC1	sialic acid binding Ig-like lectin 1, sialoadhesin	6.00706		232156_at			10.2038
	210439_at	ICOS	inducible T-cell co-stimulator	6.00257		226560_at			10.1967
	205842_s_at	JAK2	Janus kinase 2 (a protein tyrosine kinase)	5.94882		235742_at	RHOC	ras homolog gene family, member C	10.1741
	207574_s_at	GADD45B	growth arrest and DNA-damage-inducible, beta	5.88352		1564121_at	ABR	active BCR-related gene	10.1251
	223502_s_at	TNFSF13B	tumor necrosis factor (ligand) superfamily, member 13b	5.85282		230031_at	HSPA5	heat shock 70kDa protein 5 (glucose-regulated protein, 78kDa)	10.1199
	218986_s_at	FLJ20035	hypothetical protein FLJ20035	5.79995		205676_at	CYP27B1	cytochrome P450, family 27, subfamily B, polypeptide 1	10.1164
	235173_at	hCG_1806964	hCG1806964	5.7961		205798_at	IL7R	interleukin 7 receptor	9.86858
	244598_at	LOC133874	hypothetical gene LOC133874	5.74673		204781_s_at	FAS	Fas (TNF receptor superfamily, member 6)	9.81437
	212386_at	TCF4	transcription factor 4	5.67241		211018_at	LSS	lanosterol synthase (2,3-oxidosqualene-lanosterol cyclase)	9.79375
	244251_at	LCP2	lymphocyte cytosolic protein 2 (SH2 domain containing leukocyte protein of 76kDa)	5.65424		220266_s_at	KLF4	Kruppel-like factor 4 (gut)	9.78967
	230636_s_at	KLF9	Kruppel-like factor 9	5.64393		242907_at	GBP2	guanylate binding protein 2, interferon-inducible	9.77109
	222139_at	KIAA1466	KIAA1466 gene	5.62995		203991_s_at	UTX	ubiquitously transcribed tetratricopeptide repeat, X chromosome	9.69816
	228152_s_at	FLJ31033	hypothetical protein FLJ31033	5.61563		218943_s_at	DDX58	DEAD (Asp-Glu-Ala-Asp) box polypeptide 58	9.61111
	228468_at	MASTL	microtubule associated serine/threonine kinase-like	5.60167		219938_s_at	PSTPIP2	proline-serine-threonine phosphatase interacting protein 2	9.57177
	211012_s_at	PML	promyelocytic leukemia	5.58641		237097_at	SPTBN5	spectrin, beta, non-erythrocytic 5	9.53621
	226345_at			5.55555		209398_at	HIST1H1C	histone cluster 1, H1c	9.49827
	1556643_at	FAM125A	family with sequence similarity 125, member A	5.54011		205153_s_at	CD40	CD40 molecule, TNF receptor superfamily member 5	9.42752
	230383_x_at			5.53565		217546_at	MT1M	metallothionein 1M	9.39702
	202307_s_at	TAP1	transporter 1, ATP-binding cassette, sub-family B (MDR/TAP)	5.53457		225767_at			9.3735
	205899_at	CCNA1	cyclin A1	5.46278		202948_at	IL1R1	interleukin 1 receptor, type I	9.30653
	225644_at	CCDC117	coiled-coil domain containing 117	5.44865		218880_at	FOSL2	FOS-like antigen 2	9.29223
	213361_at	TDRD7	tudor domain containing 7	5.41368		231779_at	IRAK2	interleukin-1 receptor-associated kinase 2	9.28753
	206359_at	SOCS3	suppressor of cytokine signaling 3	5.37194		225886_at			9.28423
	203378_at	PCF11	PCF11, cleavage and polyadenylation factor subunit, homolog (S. cerevisiae)	5.29077		227044_at	TBC1D22A	TBC1 domain family, member 22A	9.23621
	209199_s_at	MEF2C	myocyte enhancer factor 2C	5.28355		230657_at	CLOCK	clock homolog (mouse)	9.19335
	204451_at	FZD1	frizzled homolog 1 (Drosophila)	5.22849		220066_at	NOD2	nucleotide-binding oligomerization domain containing 2	9.15867
	212619_at	KIAA0286	KIAA0286 protein	5.21511		206508_at	CD70	CD70 molecule	9.06565
	211538_s_at	HSPA2	heat shock 70kDa protein 2	5.17243		210230_at	LOC728965	hypothetical protein LOC728965	9.03098
	1568832_a_at			5.15697		233506_at			8.96449
	209417_s_at	IFI35	interferon-induced protein 35	5.14684		239582_at	PML	promyelocytic leukemia	8.9157
	228617_at	XAF1	XIAP associated factor-1	5.10867		227180_at	ELOVL7	ELOVL family member 7, elongation of long chain fatty acids (yeast)	8.83133
	209568_s_at	RGL1	ral guanine nucleotide dissociation stimulator-like 1	5.10288		214715_x_at	ZNF160	zinc finger protein 160	8.81316
	204249_s_at	LMO2	LIM domain only 2 (rhombotin-like 1)	5.05799		202357_s_at	CFB	complement factor B	8.80765
	223647_x_at	HSCB	HscB iron-sulfur cluster co-chaperone homolog (E. coli)	5.03558		243754_at			8.78493
	231312_at			5.0248		206157_at	PTX3	pentraxin-related gene, rapidly induced by IL-1 beta	8.72685
	206271_at	TLR3	Toll-like receptor 3	5.02
	213346_at	C13orf27	chromosome 13 open reading frame 27	5.01459		226713_at	CCDC50	coiled-coil domain containing 50	8.66966
	235174_s_at	LOC728923	hypothetical protein LOC728923	4.95793		214696_at	MGC14376	hypothetical protein MGC14376	8.65963
	227361_at	HS3ST3B1	heparan sulfate (glucosamine) 3-O-sulfotransferase 3B1	4.93009		232150_at	RBCK1	RanBP-type and C3HC4-type zinc finger containing 1	8.57139
	203810_at	DNAJB4	DnaJ (Hsp40) homolog, subfamily B, member 4	4.89537		211071_s_at	MLLT11	myeloid/lymphoid or mixed-lineage leukemia (trithorax homolog, Drosophila); translocated to, 11	8.50178
	230480_at	PIWIL4	piwi-like 4 (Drosophila)	4.87909		219911_s_at	SLCO4A1	solute carrier organic anion transporter family, member 4A1	8.33418
	209706_at	NKX3-1	NK3 homeobox 1	4.85346		219257_s_at	SPHK1	sphingosine kinase 1	8.32464
	218706_s_at	GRAMD3	GRAM domain containing 3	4.7944		1556750_at	LOC153577	hypothetical protein LOC153577	8.14247
	227014_at	ASPHD2	aspartate beta-hydroxylase domain containing 2	4.74155		238825_at	ACRC	acidic repeat containing	8.12222
	225834_at	GCUD2	gastric cancer up-regulated-2	4.72375		205510_s_at	FLJ10038	hypothetical protein FLJ10038	8.10231
	202269_x_at	GBP1	guanylate binding protein 1, interferon-inducible, 67kDa	4.71393		1559977_a_at	SLC25A34	solute carrier family 25, member 34	8.09433
	226317_at	PPP4R2	protein phosphatase 4, regulatory subunit 2	4.68099		213573_at	KPNB1	karyopherin (importin) beta 1	8.08929
	53720_at	FLJ11286	hypothetical protein FLJ11286	4.67515		209636_at	NFKB2	nuclear factor of kappa light polypeptide gene enhancer in B-cells 2 (p49/p100)	7.96855
	200974_at	ACTA2	actin, alpha 2, smooth muscle, aorta	4.66884		208527_x_at	HIST1H2BE	histone cluster 1, H2be	7.95778
	229510_at	MS4A7	membrane-spanning 4-domains, subfamily A, member 7	4.662		204200_s_at	PDGFB	platelet-derived growth factor beta polypeptide (simian sarcoma viral (v-sis) oncogene homolog)	7.89559
	217848_s_at	PPA1	pyrophosphatase (inorganic) 1	4.63856		216268_s_at	JAG1	jagged 1 (Alagille syndrome)	7.84415
	230405_at	LOC441108	hypothetical gene supported by AK128882	4.63173		209806_at	HIST1H2BK	histone cluster 1, H2bk	7.84277
	1559777_at			4.60685		204929_s_at	VAMP5	vesicle-associated membrane protein 5 (myobrevin)	7.83647
	213038_at	RNF19B	ring finger protein 19B	4.58999		218665_at	FZD4	frizzled homolog 4 (Drosophila)	7.81622
	204825_at	MELK	maternal embryonic leucine zipper kinase	4.58292		231312_at			7.72549
	213497_at	ABTB2	ankyrin repeat and BTB (POZ) domain containing 2	4.51898		209706_at	NKX3-1	NK3 homeobox 1	7.69575
	205767_at	EREG	epiregulin	4.49021		220054_at	IL23A	interleukin 23, alpha subunit p19	7.62442
	227458_at			4.48533		223767_at	GPR84	G protein-coupled receptor 84	7.6229
	224701_at	PARP14	poly (ADP-ribose) polymerase family, member 14	4.41047		214848_at			7.51948
	228412_at	LOC643072	hypothetical LOC643072	4.40109		234306_s_at	SLAMF7	SLAM family member 7	7.51768
	238430_x_at	SLFN5	schlafen family member 5	4.3879		37005_at	NBL1	neuroblastoma, suppression of tumorigenicity 1	7.473
	226464_at	C3orf58	chromosome 3 open reading frame 58	4.37409		238612_at			7.46496
	218248_at	FAM111A	family with sequence similarity 111, member A	4.36447		230203_at	FLJ46875	hypothetical LOC440918	7.43265
	202948_at	IL1R1	interleukin 1 receptor, type I	4.35488		239979_at	EPSTI1	epithelial stromal interaction 1 (breast)	7.39095
	207375_s_at	IL15RA	interleukin 15 receptor, alpha	4.33258		210511_s_at	INHBA	inhibin, beta A	7.36426
	208707_at	EIF5	eukaryotic translation initiation factor 5	4.28362		227708_at	EEF1A1	eukaryotic translation elongation factor 1 alpha 1	7.30555
	228013_at	PPP2R2A	protein phosphatase 2 (formerly 2A), regulatory subunit B, alpha isoform	4.26974		240013_at			7.26264
	208070_s_at	REV3L	REV3-like, catalytic subunit of DNA polymerase zeta (yeast)	4.26006		208392_x_at	SP110	SP110 nuclear body protein	7.25667
	204205_at	APOBEC3G	apolipoprotein B mRNA editing enzyme, catalytic polypeptide-like 3G	4.25866		235309_at			7.25116
	218280_x_at	HIST2H2AA3	histone cluster 2, H2aa3	4.25334		208776_at	PSMD11	proteasome (prosome, macropain) 26S subunit, non-ATPase, 11	7.24987
	206838_at	TBX19	T-box 19	4.24327		202307_s_at	TAP1	transporter 1, ATP-binding cassette, sub-family B (MDR/TAP)	7.2428
	230031_at	HSPA5	heat shock 70kDa protein 5 (glucose-regulated protein, 78kDa)	4.23291		229720_at	BAG1	BCL2-associated athanogene	7.13317
	208392_x_at	SP110	SP110 nuclear body protein	4.23042		242388_x_at			7.11661
	242907_at	GBP2	guanylate binding protein 2, interferon-inducible	4.21499		236703_at			7.10144
	212733_at	KIAA0226	KIAA0226	4.19482		225762_x_at	LOC284801	hypothetical protein LOC284801	7.06834
	1555689_at	CD80	CD80 molecule	4.18383		202869_at	OAS1	2',5'-oligoadenylate synthetase 1, 40/46kDa	7.06033
	226301_at	C6orf192	chromosome 6 open reading frame 192	4.17804		242181_at			7.00396
	210705_s_at	TRIM5	tripartite motif-containing 5	4.17684		227777_at	C10orf18	chromosome 10 open reading frame 18	7.00308
	226140_s_at	OTUD1	OTU domain containing 1	4.16921		205277_at	PRDM2	PR domain containing 2, with ZNF domain	6.93066
	221766_s_at	FAM46A	family with sequence similarity 46, member A	4.14718		226419_s_at	SFRS1	splicing factor, arginine/serine-rich 1 (splicing factor 2, alternate splicing factor)	6.9145
	208066_s_at	GTF2B	general transcription factor IIB	4.1337		204197_s_at	RUNX3	runt-related transcription factor 3	6.90979
	218694_at	ARMCX1	armadillo repeat containing, X-linked 1	4.12385		207574_s_at	GADD45B	growth arrest and DNA-damage-inducible, beta	6.90633
	213793_s_at	HOMER1	homer homolog 1 (Drosophila)	4.10122		202815_s_at	HEXIM1	hexamethylene bis-acetamide inducible 1	6.88484
	1569403_at	C7orf10	chromosome 7 open reading frame 10	4.06782		216627_s_at	B4GALT1	UDP-Gal:betaGlcNAc beta 1,4- galactosyltransferase, polypeptide 1	6.87998
	204780_s_at	FAS	Fas (TNF receptor superfamily, member 6)	4.06327		235422_at	LOC727804	hypothetical protein LOC727804	6.86605
	202357_s_at	CFB	complement factor B	4.05286		201631_s_at	IER3	immediate early response 3	6.86476
	238389_s_at			4.03231		228626_at			6.86472
	242790_at	SNF8	SNF8, ESCRT-II complex subunit, homolog (S. cerevisiae)	4.01991		210118_s_at	IL1A	interleukin 1, alpha	6.86214
	222748_s_at	TXNL4B	thioredoxin-like 4B	4.01405		212642_s_at	HIVEP2	human immunodeficiency virus type I enhancer binding protein 2	6.82324
	225128_at	KDELC2	KDEL (Lys-Asp-Glu-Leu) containing 2	3.997		204912_at	IL10RA	interleukin 10 receptor, alpha	6.80864
	230110_at	MCOLN2	mucolipin 2	3.99057		224807_at	GRAMD1A	GRAM domain containing 1A	6.72615
	230937_at	LOC285835	hypothetical protein LOC285835	3.958		214097_at	RPS21	ribosomal protein S21	6.72132
	213138_at	ARID5A	AT rich interactive domain 5A (MRF1-like)	3.93537		202071_at	SDC4	syndecan 4	6.68321
	202779_s_at	UBE2S	ubiquitin-conjugating enzyme E2S	3.87805		1569403_at	C7orf10	chromosome 7 open reading frame 10	6.6791
	230657_at	CLOCK	clock homolog (mouse)	3.85923		215071_s_at	HIST1H2AC	histone cluster 1, H2ac	6.6681
	201328_at	ETS2	v-ets erythroblastosis virus E26 oncogene homolog 2 (avian)	3.78532		229572_at			6.65879
	232024_at	GIMAP2	GTPase, IMAP family member 2	3.77748		223339_at	ATPIF1	ATPase inhibitory factor 1	6.65832
	207996_s_at	C18orf1	chromosome 18 open reading frame 1	3.75536		226458_at			6.62981
	205227_at	IL1RAP	interleukin 1 receptor accessory protein	3.74286		215978_x_at	LOC152719	hypothetical protein LOC152719	6.61855
	204959_at	MNDA	myeloid cell nuclear differentiation antigen	3.72174		205241_at	SCO2	SCO cytochrome oxidase deficient homolog 2 (yeast)	6.5985
	203765_at	GCA	grancalcin, EF-hand calcium binding protein	3.69598		242838_at	MAP6D1	MAP6 domain containing 1	6.59649
	225076_s_at	ZNFX1	zinc finger, NFX1-type containing 1	3.68858		202725_at	POLR2A	polymerase (RNA) II (DNA directed) polypeptide A, 220kDa	6.55145
	227935_s_at	PCGF5	polycomb group ring finger 5	3.68539		202638_s_at	ICAM1	intercellular adhesion molecule 1 (CD54), human rhinovirus receptor	6.51671
	1555852_at	PSMB9	proteasome (prosome, macropain) subunit, beta type, 9 (large multifunctional peptidase 2)	3.66489		201328_at	ETS2	v-ets erythroblastosis virus E26 oncogene homolog 2 (avian)	6.48388
	204070_at	RARRES3	retinoic acid receptor responder (tazarotene induced) 3	3.66032		238725_at			6.43377
	202554_s_at	GSTM3	glutathione S-transferase M3 (brain)	3.65895		218706_s_at	GRAMD3	GRAM domain containing 3	6.43359
	204103_at	CCL4	chemokine (C-C motif) ligand 4	3.64271		232044_at	RBBP6	retinoblastoma binding protein 6	6.41566
	227180_at	ELOVL7	ELOVL family member 7, elongation of long chain fatty acids (yeast)	3.63921		209409_at	GRB10	growth factor receptor-bound protein 10	6.41131
	220252_x_at	CXorf21	chromosome X open reading frame 21	3.62692		211538_s_at	HSPA2	heat shock 70kDa protein 2	6.39813
	223393_s_at	TSHZ3	teashirt zinc finger homeobox 3	3.60744		208741_at	SAP18	Sin3A-associated protein, 18kDa	6.37964
	200628_s_at	WARS	tryptophanyl-tRNA synthetase	3.60138		202759_s_at	PALM2-AKAP2	PALM2-AKAP2 protein	6.36208
	202923_s_at	GCLC	glutamate-cysteine ligase, catalytic subunit	3.59709		1558938_at	C14orf122	chromosome 14 open reading frame 122	6.34821
	214104_at	GPR161	G protein-coupled receptor 161	3.58607		230966_at	NUP62	nucleoporin 62kDa	6.33306
	200940_s_at	RERE	arginine-glutamic acid dipeptide (RE) repeats	3.584		201995_at	EXT1	exostoses (multiple) 1	6.29368
	209939_x_at	CFLAR	CASP8 and FADD-like apoptosis regulator	3.57729		239252_at			6.28872
	225886_at			3.56229		235174_s_at	LOC728923	hypothetical protein LOC728923	6.25146
	226458_at			3.55993		206026_s_at	TNFAIP6	tumor necrosis factor, alpha-induced protein 6	6.23051
	201368_at	ZFP36L2	zinc finger protein 36, C3H type-like 2	3.55086		229549_at	OPN1SW	opsin 1 (cone pigments), short-wave-sensitive (color blindness, tritan)	6.20389
	212642_s_at	HIVEP2	human immunodeficiency virus type I enhancer binding protein 2	3.55084		235993_at	PSMF1	proteasome (prosome, macropain) inhibitor subunit 1 (PI31)	6.19246
	232079_s_at	PVRL2	poliovirus receptor-related 2 (herpesvirus entry mediator B)	3.5495		203725_at	GADD45A	growth arrest and DNA-damage-inducible, alpha	6.1301
	225415_at	DTX3L	deltex 3-like (Drosophila)	3.52669		206724_at	CBX4	chromobox homolog 4 (Pc class homolog, Drosophila)	6.11055
	1559051_s_at	C6orf150	chromosome 6 open reading frame 150	3.52208		225418_at	PVRL2	poliovirus receptor-related 2 (herpesvirus entry mediator B)	6.10823
	212614_at	ARID5B	AT rich interactive domain 5B (MRF1-like)	3.52083		230376_at	GCNT3	glucosaminyl (N-acetyl) transferase 3, mucin type	6.02513
	218400_at	OAS3	2'-5'-oligoadenylate synthetase 3, 100kDa	3.52069		228548_at			6.02468
	207655_s_at	BLNK	B-cell linker	3.50928		232229_at	SETX	senataxin	6.0218
	203387_s_at	TBC1D4	TBC1 domain family, member 4	3.50738		213895_at	EMP1	epithelial membrane protein 1	6.00008
	209878_s_at	RELA	v-rel reticuloendotheliosis viral oncogene homolog A, nuclear factor of kappa light polypeptide gene enhancer in B-cells 3, p65 (avian)	3.50653		209593_s_at	TOR1B	torsin family 1, member B (torsin B)	5.99515
	205807_s_at	TUFT1	tuftelin 1	3.50593		212565_at	STK38L	serine/threonine kinase 38 like	5.96218
	1556228_a_at	VCPIP1	valosin containing protein (p97)/p47 complex interacting protein 1	3.47597		210069_at	CPT1B	carnitine palmitoyltransferase 1B (muscle)	5.9135
	201703_s_at	PPP1R10	protein phosphatase 1, regulatory (inhibitor) subunit 10	3.40952		1568623_a_at	SLC35E4	solute carrier family 35, member E4	5.89943
	1554057_at	LOC645676	hypothetical LOC645676	3.3798		209878_s_at	RELA	v-rel reticuloendotheliosis viral oncogene homolog A, nuclear factor of kappa light polypeptide gene enhancer in B-cells 3, p65 (avian)	5.89576
	225814_at	XRN1	5'-3' exoribonuclease 1	3.37494		206765_at	KCNJ2	potassium inwardly-rectifying channel, subfamily J, member 2	5.8839
	202702_at	TRIM26	tripartite motif-containing 26	3.35639		230082_at	LRRFIP2	leucine rich repeat (in FLII) interacting protein 2	5.86651
	217787_s_at	GALNT2	UDP-N-acetyl-alpha-D-galactosamine:polypeptide N-acetylgalactosaminyltransferase 2 (GalNAc-T2)	3.35506		229543_at	FAM26F	family with sequence similarity 26, member F	5.86551
	202446_s_at	PLSCR1	phospholipid scramblase 1	3.31187		229762_at	C7orf38	chromosome 7 open reading frame 38	5.86031
	206857_s_at	FKBP1B	FK506 binding protein 1B, 12.6 kDa	3.30651		228238_at	CENPL	centromere protein L	5.81969
	224454_at	ETNK1	ethanolamine kinase 1	3.29625		239629_at	CFLAR	CASP8 and FADD-like apoptosis regulator	5.78389
	208912_s_at	CNP	2',3'-cyclic nucleotide 3' phosphodiesterase	3.28588		213051_at	ZC3HAV1	zinc finger CCCH-type, antiviral 1	5.78378
	201693_s_at	EGR1	early growth response 1	3.28076		227029_at	C14orf24	chromosome 14 open reading frame 24	5.73399
	215411_s_at	TRAF3IP2	TRAF3 interacting protein 2	3.26493		222392_x_at	PERP	PERP, TP53 apoptosis effector	5.73078
	218640_s_at	PLEKHF2	pleckstrin homology domain containing, family F (with FYVE domain) member 2	3.23726		204794_at	DUSP2	dual specificity phosphatase 2	5.63021
	221827_at	RBCK1	RanBP-type and C3HC4-type zinc finger containing 1	3.22801		219500_at	CLCF1	cardiotrophin-like cytokine factor 1	5.62758
	229963_at	NGFRAP1L1	NGFRAP1-like 1	3.19804		202081_at	IER2	immediate early response 2	5.5956
	223705_s_at	GPBP1	GC-rich promoter binding protein 1	3.19261		218888_s_at	NETO2	neuropilin (NRP) and tolloid (TLL)-like 2	5.59421
	226753_at	FAM76B	family with sequence similarity 76, member B	3.17955		205899_at	CCNA1	cyclin A1	5.59283
	217897_at	FXYD6	FXYD domain containing ion transport regulator 6	3.17002		230383_x_at			5.59061
	213803_at	KPNB1	karyopherin (importin) beta 1	3.13174		209414_at	FZR1	fizzy/cell division cycle 20 related 1 (Drosophila)	5.58084
	206025_s_at	TNFAIP6	tumor necrosis factor, alpha-induced protein 6	3.13087		217848_s_at	PPA1	pyrophosphatase (inorganic) 1	5.53675
	230446_at			3.12946		201641_at	BST2	bone marrow stromal cell antigen 2	5.48614
	205419_at	EBI2	Epstein-Barr virus induced gene 2 (lymphocyte-specific G protein-coupled receptor)	3.11233		225863_s_at	C19orf12	chromosome 19 open reading frame 12	5.4669
	204415_at	IFI6	interferon, alpha-inducible protein 6	3.10062		203045_at	NINJ1	ninjurin 1	5.45649
	213251_at	SMARCA5	SWI/SNF related, matrix associated, actin dependent regulator of chromatin, subfamily a, member 5	3.08509		204451_at	FZD1	frizzled homolog 1 (Drosophila)	5.44906
	236831_at	CCDC50	coiled-coil domain containing 50	3.07424		209544_at	RIPK2	receptor-interacting serine-threonine kinase 2	5.4301
	228365_at	CPNE8	copine VIII	3.04322		229426_at	COX5A	cytochrome c oxidase subunit Va	5.41038
	54632_at	THADA	thyroid adenoma associated	3.00807		218883_s_at	MLF1IP	MLF1 interacting protein	5.40362
	232034_at	LOC203274	hypothetical protein LOC203274	2.9994		208082_x_at			5.3954
	200676_s_at	UBE2L3	ubiquitin-conjugating enzyme E2L 3	2.99792		213425_at	WNT5A	wingless-type MMTV integration site family, member 5A	5.3784
	212185_x_at	MT2A	metallothionein 2A	2.98937		237333_at	SYNC1	syncoilin, intermediate filament 1	5.37502
	1568592_at	TRIM69	tripartite motif-containing 69	2.97714		225142_at	JHDM1D	jumonji C domain-containing histone demethylase 1 homolog D (S. cerevisiae)	5.37126
	222631_at	PI4K2B	phosphatidylinositol 4-kinase type 2 beta	2.97457		230511_at	CREM	cAMP responsive element modulator	5.35845
	210102_at	LOH11CR2A	loss of heterozygosity, 11, chromosomal region 2, gene A	2.96707		219691_at	SAMD9	sterile alpha motif domain containing 9	5.34776
	207980_s_at	CITED2	Cbp/p300-interacting transactivator, with Glu/Asp-rich carboxy-terminal domain, 2	2.96359		209267_s_at	SLC39A8	solute carrier family 39 (zinc transporter), member 8	5.34581
	205061_s_at	EXOSC9	exosome component 9	2.94644		201473_at	JUNB	jun B proto-oncogene	5.34444
	208581_x_at	MT1X	metallothionein 1X	2.94459		205114_s_at	CCL3	chemokine (C-C motif) ligand 3	5.33753
	229937_x_at	LILRB1	leukocyte immunoglobulin-like receptor, subfamily B (with TM and ITIM domains), member 1	2.93687		230110_at	MCOLN2	mucolipin 2	5.33365
	215346_at	CD40	CD40 molecule, TNF receptor superfamily member 5	2.92878		212657_s_at	IL1RN	interleukin 1 receptor antagonist	5.29247
	202411_at	IFI27	interferon, alpha-inducible protein 27	2.89253		229068_at	CCT5	chaperonin containing TCP1, subunit 5 (epsilon)	5.27098
	205114_s_at	CCL3	chemokine (C-C motif) ligand 3	2.89184		204908_s_at	BCL3	B-cell CLL/lymphoma 3	5.20728
	206411_s_at	ABL2	v-abl Abelson murine leukemia viral oncogene homolog 2 (arg, Abelson-related gene)	2.84991		239648_at	DCUN1D3	DCN1, defective in cullin neddylation 1, domain containing 3 (S. cerevisiae)	5.18507
	227084_at	DTNA	dystrobrevin, alpha	2.84896		117_at	HSPA6	heat shock 70kDa protein 6 (HSP70B')	5.15541
	231871_at	GPR180	G protein-coupled receptor 180	2.84895		222480_at	UBE2Q1	ubiquitin-conjugating enzyme E2Q (putative) 1	5.14785
	210190_at	STX11	syntaxin 11	2.83654		215373_x_at	FLJ12151	hypothetical protein FLJ12151	5.10902
	203225_s_at	RFK	riboflavin kinase	2.8131		210731_s_at			5.10839
	205504_at	BTK	Bruton agammaglobulinemia tyrosine kinase	2.79955		206513_at	AIM2	absent in melanoma 2	5.09991
	234491_s_at	SAV1	salvador homolog 1 (Drosophila)	2.78457		209015_s_at	DNAJB6	DnaJ (Hsp40) homolog, subfamily B, member 6	5.08475
	229695_at	FAM107B	family with sequence similarity 107, member B	2.76426		221480_at	HNRPD	heterogeneous nuclear ribonucleoprotein D (AU-rich element RNA binding protein 1, 37kDa)	5.08376
	202081_at	IER2	immediate early response 2	2.76166		213038_at	RNF19B	ring finger protein 19B	5.0739
	208922_s_at	NXF1	nuclear RNA export factor 1	2.75966		223192_at	SLC25A28	solute carrier family 25, member 28	5.03724
	201695_s_at	NP	nucleoside phosphorylase	2.75242		227345_at	TNFRSF10D	tumor necrosis factor receptor superfamily, member 10d, decoy with truncated death domain	4.99902
	226218_at	IL7R	interleukin 7 receptor	2.74576		239310_at	DDB2	damage-specific DNA binding protein 2, 48kDa	4.98196
	205476_at	CCL20	chemokine (C-C motif) ligand 20	2.74547		230640_at	PRPF40B	PRP40 pre-mRNA processing factor 40 homolog B (S. cerevisiae)	4.97681
	214695_at	UBAP2L	ubiquitin associated protein 2-like	2.73404		1558167_a_at	MGC16275	hypothetical protein MGC16275	4.97613
	217985_s_at	BAZ1A	bromodomain adjacent to zinc finger domain, 1A	2.72977		206411_s_at	ABL2	v-abl Abelson murine leukemia viral oncogene homolog 2 (arg, Abelson-related gene)	4.96952
	237563_s_at	LOC440731	hypothetical LOC440731	2.72875		204447_at	ProSAPiP1	ProSAPiP1 protein	4.94762
	209015_s_at	DNAJB6	DnaJ (Hsp40) homolog, subfamily B, member 6	2.71476		227014_at	ASPHD2	aspartate beta-hydroxylase domain containing 2	4.93465
	225931_s_at	RNF213	ring finger protein 213	2.71074		244647_at			4.93151
	213293_s_at	TRIM22	tripartite motif-containing 22	2.70893		223394_at	SERTAD1	SERTA domain containing 1	4.93063
	201542_at	SAR1A	SAR1 gene homolog A (S. cerevisiae)	2.69332		228661_s_at			4.90938
	207740_s_at	NUP62	nucleoporin 62kDa	2.68393		214906_x_at	CG018	hypothetical gene CG018	4.90514
	35254_at	TRAFD1	TRAF-type zinc finger domain containing 1	2.66668		218810_at	ZC3H12A	zinc finger CCCH-type containing 12A	4.89737
	213191_at	TICAM1	toll-like receptor adaptor molecule 1	2.66617		232215_x_at	PRR11	proline rich 11	4.88432
	226524_at	C3orf38	chromosome 3 open reading frame 38	2.65586		213361_at	TDRD7	tudor domain containing 7	4.86212
	203596_s_at	IFIT5	interferon-induced protein with tetratricopeptide repeats 5	2.65335		235483_at			4.81579
	227571_at			2.64215		227293_at	LNX1	ligand of numb-protein X 1	4.81538
	218508_at	DCP1A	DCP1 decapping enzyme homolog A (S. cerevisiae)	2.6181		238389_s_at			4.81534
	227040_at	RP11-50D16.3	similar to RIKEN cDNA 8030451K01	2.61484		228292_at			4.80896
	223849_s_at	MOV10	Mov10, Moloney leukemia virus 10, homolog (mouse)	2.59014		201195_s_at	SLC7A5	solute carrier family 7 (cationic amino acid transporter, y+ system), member 5	4.80512
	226633_at	RAB8B	RAB8B, member RAS oncogene family	2.58922		201785_at	RNASE1	ribonuclease, RNase A family, 1 (pancreatic)	4.80038
	203550_s_at	C1orf2	chromosome 1 open reading frame 2	2.58322		204998_s_at	ATF5	activating transcription factor 5	4.79776
	204715_at	PANX1	pannexin 1	2.56999		228931_at	COQ4	coenzyme Q4 homolog (S. cerevisiae)	4.76357
	208370_s_at	RCAN1	regulator of calcineurin 1	2.56877		211844_s_at	NRP2	neuropilin 2	4.74079
	202643_s_at	TNFAIP3	tumor necrosis factor, alpha-induced protein 3	2.55533		218330_s_at	NAV2	neuron navigator 2	4.73074
	225636_at	STAT2	signal transducer and activator of transcription 2, 113kDa	2.54847		238893_at	LOC338758	hypothetical protein LOC338758	4.72847
	217419_x_at	AGRN	agrin	2.53491		230917_at			4.72494
	201138_s_at	SSB	Sjogren syndrome antigen B (autoantigen La)	2.52334		201189_s_at	ITPR3	inositol 1,4,5-triphosphate receptor, type 3	4.7148
	1563315_s_at	ERICH1	glutamate-rich 1	2.51873		223741_s_at	TTYH2	tweety homolog 2 (Drosophila)	4.69667
	226843_s_at	PAPD5	PAP associated domain containing 5	2.49145		201316_at	PSMA2	proteasome (prosome, macropain) subunit, alpha type, 2	4.67393
	210549_s_at	CCL23	chemokine (C-C motif) ligand 23	2.49041		203143_s_at	KIAA0040	KIAA0040	4.65704
	213341_at	FEM1C	fem-1 homolog c (C. elegans)	2.47489		226644_at	MIB2	mindbomb homolog 2 (Drosophila)	4.64543
	229630_s_at	WTAP	Wilms tumor 1 associated protein	2.46316		228397_at	TUG1	taurine upregulated gene 1	4.6436
	212305_s_at	MIA3	melanoma inhibitory activity family, member 3	2.45444		227140_at			4.6355
	216202_s_at	SPTLC2	serine palmitoyltransferase, long chain base subunit 2	2.44261		202531_at	IRF1	interferon regulatory factor 1	4.63477
	209310_s_at	CASP4	caspase 4, apoptosis-related cysteine peptidase	2.43661		1555847_a_at	LOC284454	hypothetical protein LOC284454	4.61913
	205547_s_at	TAGLN	transgelin	2.42823		203358_s_at	EZH2	enhancer of zeste homolog 2 (Drosophila)	4.60368
	209545_s_at	RIPK2	receptor-interacting serine-threonine kinase 2	2.42777		210790_s_at	SAR1A	SAR1 gene homolog A (S. cerevisiae)	4.60193
	211071_s_at	MLLT11	myeloid/lymphoid or mixed-lineage leukemia (trithorax homolog, Drosophila); translocated to, 11	2.42181		210151_s_at	DYRK3	dual-specificity tyrosine-(Y)-phosphorylation regulated kinase 3	4.6016
	209230_s_at	NUPR1	nuclear protein 1	2.41943		226275_at	MXD1	MAX dimerization protein 1	4.59606
	226045_at	FRS2	fibroblast growth factor receptor substrate 2	2.41655		229319_at			4.57826
	203024_s_at	C5orf15	chromosome 5 open reading frame 15	2.41172		1559051_s_at	C6orf150	chromosome 6 open reading frame 150	4.57332
	38269_at	PRKD2	protein kinase D2	2.39187		1569030_s_at	NUB1	negative regulator of ubiquitin-like proteins 1	4.54672
	228619_x_at	TIPRL	TIP41, TOR signaling pathway regulator-like (S. cerevisiae)	2.38857		236527_at	ATP6V0E1	ATPase, H+ transporting, lysosomal 9kDa, V0 subunit e1	4.54611
	205191_at	RP2	retinitis pigmentosa 2 (X-linked recessive)	2.37671		228987_at			4.53173
	225414_at	RNF149	ring finger protein 149	2.37376		225076_s_at	ZNFX1	zinc finger, NFX1-type containing 1	4.52483
	244397_at			2.36562		226858_at	CSNK1E	casein kinase 1, epsilon	4.51739
	210895_s_at	CD86	CD86 molecule	2.3601		232266_x_at	CDC2L5	cell division cycle 2-like 5 (cholinesterase-related cell division controller)	4.51451
	200880_at	DNAJA1	DnaJ (Hsp40) homolog, subfamily A, member 1	2.3588		215886_x_at	USP12	ubiquitin specific peptidase 12	4.51036
	209409_at	GRB10	growth factor receptor-bound protein 10	2.3562		207291_at	PRRG4	proline rich Gla (G-carboxyglutamic acid) 4 (transmembrane)	4.50673
	221230_s_at	ARID4B	AT rich interactive domain 4B (RBP1-like)	2.34422		242770_at	C20orf80	chromosome 20 open reading frame 80	4.50234
	221021_s_at	CTNNBL1	catenin, beta like 1	2.34281		236600_at	SPG20	spastic paraplegia 20 (Troyer syndrome)	4.50195
	217955_at	BCL2L13	BCL2-like 13 (apoptosis facilitator)	2.32368		230446_at			4.49963
	203164_at	SLC33A1	solute carrier family 33 (acetyl-CoA transporter), member 1	2.30904		237104_at	CTSS	cathepsin S	4.49906
	225010_at	CCDC6	coiled-coil domain containing 6	2.30265		235901_at			4.4872
	205067_at	IL1B	interleukin 1, beta	2.27209		219684_at	RTP4	receptor (chemosensory) transporter protein 4	4.47886
	218809_at	PANK2	pantothenate kinase 2 (Hallervorden-Spatz syndrome)	2.25739		226317_at	PPP4R2	protein phosphatase 4, regulatory subunit 2	4.47266
	228706_s_at	CLDN23	claudin 23	2.25739		226307_at	CRTC2	CREB regulated transcription coactivator 2	4.47098
	209318_x_at	PLAGL1	pleiomorphic adenoma gene-like 1	2.2545		1554110_at	CDCP1	CUB domain containing protein 1	4.46946
	221727_at	SUB1	SUB1 homolog (S. cerevisiae)	2.24556		222537_s_at	CDC42SE1	CDC42 small effector 1	4.45639
	200732_s_at	PTP4A1	protein tyrosine phosphatase type IVA, member 1	2.24318		235014_at	LOC147727	hypothetical protein LOC147727	4.45421
	1294_at	UBE1L	ubiquitin-activating enzyme E1-like	2.23576		238790_at	LOC374443	CLR pseudogene	4.4498
	209040_s_at	PSMB8	proteasome (prosome, macropain) subunit, beta type, 8 (large multifunctional peptidase 7)	2.22283		224648_at	GPBP1	GC-rich promoter binding protein 1	4.43897
	204211_x_at	EIF2AK2	eukaryotic translation initiation factor 2-alpha kinase 2	2.21839		212621_at	KIAA0286	KIAA0286 protein	4.43419
	201999_s_at	DYNLT1	dynein, light chain, Tctex-type 1	2.19665		227458_at			4.43368
	226457_at			2.19367		213005_s_at	ANKRD15	ankyrin repeat domain 15	4.42628
	202304_at	FNDC3A	fibronectin type III domain containing 3A	2.17674		215617_at			4.36973
	222952_at	TLR7	Toll like receptor 7	2.15
	238469_at			2.14946		227583_at	POP4	processing of precursor 4, ribonuclease P/MRP subunit (S. cerevisiae)	4.36029
	209141_at	UBE2G1	ubiquitin-conjugating enzyme E2G 1 (UBC7 homolog, yeast)	-2.06614		204495_s_at	C15orf39	chromosome 15 open reading frame 39	4.35778
	212535_at	LYSMD4	LysM, putative peptidoglycan-binding, domain containing 4	-2.07316		201389_at	ITGA5	integrin, alpha 5 (fibronectin receptor, alpha polypeptide)	4.35244
	235338_s_at	SETDB2	SET domain, bifurcated 2	-2.0838		205807_s_at	TUFT1	tuftelin 1	4.33858
	214112_s_at	CXorf40A	chromosome X open reading frame 40A	-2.09079		222471_s_at	KCMF1	potassium channel modulatory factor 1	4.33761
	202246_s_at	CDK4	cyclin-dependent kinase 4	-2.10297		235207_at			4.32603
	212871_at	MAPKAPK5	mitogen-activated protein kinase-activated protein kinase 5	-2.10673		235110_at	HRASLS3	HRAS-like suppressor 3	4.32005
	208773_s_at	ANKHD1	ankyrin repeat and KH domain containing 1	-2.12647		203068_at	KLHL21	kelch-like 21 (Drosophila)	4.30833
	227579_at			-2.1297		235061_at	PPM1K	protein phosphatase 1K (PP2C domain containing)	4.30458
	213628_at	CLCC1	chloride channel CLIC-like 1	-2.13208		202510_s_at	TNFAIP2	tumor necrosis factor, alpha-induced protein 2	4.30168
	209122_at	ADFP	adipose differentiation-related protein	-2.14885		209457_at	DUSP5	dual specificity phosphatase 5	4.29397
	214155_s_at	LARP4	La ribonucleoprotein domain family, member 4	-2.15204		207196_s_at	TNIP1	TNFAIP3 interacting protein 1	4.29396
	213581_at	PDCD2	programmed cell death 2	-2.15374		229723_at	TAGAP	T-cell activation GTPase activating protein	4.26577
	208838_at	CAND1	cullin-associated and neddylation-dissociated 1	-2.15771		208092_s_at	FAM49A	family with sequence similarity 49, member A	4.23117
	217915_s_at	C15orf15	chromosome 15 open reading frame 15	-2.15956		227066_at	MOBKL2C	MOB1, Mps One Binder kinase activator-like 2C (yeast)	4.2209
	212339_at	EPB41L1	erythrocyte membrane protein band 4.1-like 1	-2.17186		205896_at	SLC22A4	solute carrier family 22 (organic cation transporter), member 4	4.20927
	209649_at	STAM2	signal transducing adaptor molecule (SH3 domain and ITAM motif) 2	-2.18656		235516_at	SEPSECS	Sep (O-phosphoserine) tRNA:Sec (selenocysteine) tRNA synthase	4.19256
	202435_s_at	CYP1B1	cytochrome P450, family 1, subfamily B, polypeptide 1	-2.19133		213191_at	TICAM1	toll-like receptor adaptor molecule 1	4.17958
	222526_at	GATAD2A	GATA zinc finger domain containing 2A	-2.19406		224836_at	TP53INP2	tumor protein p53 inducible nuclear protein 2	4.10429
	226110_at	PTAR1	protein prenyltransferase alpha subunit repeat containing 1	-2.19862		229453_at	ELL3	elongation factor RNA polymerase II-like 3	4.08792
	202832_at	GCC2	GRIP and coiled-coil domain containing 2	-2.20155		220254_at	LRP12	low density lipoprotein-related protein 12	4.08716
	226120_at	TTC8	tetratricopeptide repeat domain 8	-2.20815		216153_x_at	RECK	reversion-inducing-cysteine-rich protein with kazal motifs	4.06611
	229232_at	LRRC57	leucine rich repeat containing 57	-2.21253		227219_x_at	MAP1LC3A	microtubule-associated protein 1 light chain 3 alpha	4.06597
	203089_s_at	HTRA2	HtrA serine peptidase 2	-2.21327		221867_at	N4BP1	Nedd4 binding protein 1	4.05986
	230029_x_at	ZNF650	zinc finger protein 650	-2.21954		226176_s_at	USP42	ubiquitin specific peptidase 42	4.04846
	225226_at	FAM40A	family with sequence similarity 40, member A	-2.22401		236446_at	FBXL3	F-box and leucine-rich repeat protein 3	4.04574
	225662_at	ZAK	sterile alpha motif and leucine zipper containing kinase AZK	-2.22837		210285_x_at	WTAP	Wilms tumor 1 associated protein	4.03422
	223157_at	C4orf14	chromosome 4 open reading frame 14	-2.23508		233899_x_at	ZBTB10	zinc finger and BTB domain containing 10	4.03308
	208393_s_at	RAD50	RAD50 homolog (S. cerevisiae)	-2.23547		212067_s_at	C1R	complement component 1, r subcomponent	4.02009
	239346_at	TCTN2	tectonic family member 2	-2.24164		229221_at	CD44	CD44 molecule (Indian blood group)	4.00503
	232432_s_at	SLC30A5	solute carrier family 30 (zinc transporter), member 5	-2.25604		200941_at	HSBP1	heat shock factor binding protein 1	4.00432
	34206_at	CENTD2	centaurin, delta 2	-2.25876		210146_x_at	LILRB2	leukocyte immunoglobulin-like receptor, subfamily B (with TM and ITIM domains), member 2	3.99542
	201821_s_at	TIMM17A	translocase of inner mitochondrial membrane 17 homolog A (yeast)	-2.26067		200988_s_at	PSME3	proteasome (prosome, macropain) activator subunit 3 (PA28 gamma; Ki)	3.97907
	225946_at	RASSF8	Ras association (RalGDS/AF-6) domain family 8	-2.26096		223647_x_at	HSCB	HscB iron-sulfur cluster co-chaperone homolog (E. coli)	3.97392
	221900_at	COL8A2	collagen, type VIII, alpha 2	-2.26237		213134_x_at	BTG3	BTG family, member 3	3.97066
	218027_at	MRPL15	mitochondrial ribosomal protein L15	-2.28378		206868_at	STARD8	StAR-related lipid transfer (START) domain containing 8	3.96193
	226866_at	ESCO1	establishment of cohesion 1 homolog 1 (S. cerevisiae)	-2.28385		208804_s_at	SFRS6	splicing factor, arginine/serine-rich 6	3.94379
	202535_at	FADD	Fas (TNFRSF6)-associated via death domain	-2.28413		230304_at			3.93693
	223650_s_at	NRBF2	nuclear receptor binding factor 2	-2.29278		219711_at	ZNF586	zinc finger protein 586	3.92597
	212920_at			-2.29584		223278_at	GJB2	gap junction protein, beta 2, 26kDa	3.92074
	219662_at	C2orf49	chromosome 2 open reading frame 49	-2.29752		226345_at			3.89254
	213203_at	SNAPC5	small nuclear RNA activating complex, polypeptide 5, 19kDa	-2.30232		202643_s_at	TNFAIP3	tumor necrosis factor, alpha-induced protein 3	3.88616
	218295_s_at	NUP50	nucleoporin 50kDa	-2.30437		209032_s_at	CADM1	cell adhesion molecule 1	3.88066
	227852_at	RP9	retinitis pigmentosa 9 (autosomal dominant)	-2.30451		244654_at	MYO1G	myosin IG	3.87438
	223214_s_at	ZHX1	zinc fingers and homeoboxes 1	-2.30869		226117_at	TIFA	TRAF-interacting protein with a forkhead-associated domain	3.87374
	207945_s_at	CSNK1D	casein kinase 1, delta	-2.3139		225348_at	LOC727922	similar to FUS-interacting serine-arginine-rich protein 1 (TLS-associated protein with Ser-Arg repeats) (TLS-associated protein with SR repeats) (TASR) (TLS-associated serine-arginine protein) (TLS-associated SR protein) (Neural-specific SR protein...	3.86745
	204336_s_at	RGS19	regulator of G-protein signaling 19	-2.31478		228142_at	UCRC	ubiquinol-cytochrome c reductase complex (7.2 kD)	3.86368
	212036_s_at	PNN	pinin, desmosome associated protein	-2.318		221779_at	MICALL1	MICAL-like 1	3.85592
	209725_at	UTP20	UTP20, small subunit (SSU) processome component, homolog (yeast)	-2.32342		242263_at	TMED5	transmembrane emp24 protein transport domain containing 5	3.84763
	213388_at	LOC727942	similar to phosphodiesterase 4D interacting protein isoform 2	-2.32399		1560071_a_at			3.83931
	224730_at	WDR68	WD repeat domain 68	-2.32405		235479_at	CPEB2	cytoplasmic polyadenylation element binding protein 2	3.8309
	235384_at			-2.32603		211678_s_at	ZNF313	zinc finger protein 313	3.83048
	209370_s_at	SH3BP2	SH3-domain binding protein 2	-2.32746		218789_s_at	C11orf71	chromosome 11 open reading frame 71	3.82249
	238476_at	LOC153222	adult retina protein	-2.32862		203528_at	SEMA4D	sema domain, immunoglobulin domain (Ig), transmembrane domain (TM) and short cytoplasmic domain, (semaphorin) 4D	3.81205
	201379_s_at	TPD52L2	tumor protein D52-like 2	-2.33017		225012_at	HDLBP	high density lipoprotein binding protein (vigilin)	3.80588
	202860_at	DENND4B	DENN/MADD domain containing 4B	-2.33442		224387_at	COMMD5	COMM domain containing 5	3.79994
	236155_at	ZCCHC6	zinc finger, CCHC domain containing 6	-2.33638		219209_at	IFIH1	interferon induced with helicase C domain 1	3.79693
	226660_at	RPS6KB1	ribosomal protein S6 kinase, 70kDa, polypeptide 1	-2.33932		227516_at	SF3A1	splicing factor 3a, subunit 1, 120kDa	3.78905
	36030_at	HOM-TES-103	hypothetical protein LOC25900	-2.34131		200685_at	SFRS11	splicing factor, arginine/serine-rich 11	3.78655
	212842_x_at	RGPD5	RANBP2-like and GRIP domain containing 5	-2.34331		226582_at	LOC400043	hypothetical gene supported by BC009385	3.78422
	204299_at	FUSIP1	FUS interacting protein (serine/arginine-rich) 1	-2.34454		228013_at	PPP2R2A	protein phosphatase 2 (formerly 2A), regulatory subunit B, alpha isoform	3.77805
	214383_x_at	KLHDC3	kelch domain containing 3	-2.34495		238430_x_at	SLFN5	schlafen family member 5	3.77698
	225068_at	KLHL12	kelch-like 12 (Drosophila)	-2.34929		239431_at	TICAM2	toll-like receptor adaptor molecule 2	3.77567
	204357_s_at	LIMK1	LIM domain kinase 1	-2.34953		208922_s_at	NXF1	nuclear RNA export factor 1	3.76978
	212373_at	FEM1B	fem-1 homolog b (C. elegans)	-2.3521		238624_at	NLK	nemo-like kinase	3.76861
	210878_s_at	JMJD1B	jumonji domain containing 1B	-2.35286		202193_at	LIMK2	LIM domain kinase 2	3.76816
	221820_s_at	MYST1	MYST histone acetyltransferase 1	-2.3549		200880_at	DNAJA1	DnaJ (Hsp40) homolog, subfamily A, member 1	3.75501
	224962_at	C9orf69	chromosome 9 open reading frame 69	-2.36102		218294_s_at	NUP50	nucleoporin 50kDa	3.75105
	224674_at	TTYH3	tweety homolog 3 (Drosophila)	-2.36172		203024_s_at	C5orf15	chromosome 5 open reading frame 15	3.7474
	225055_at	AMZ2	archaemetzincins-2	-2.36336		238923_at	SPOP	speckle-type POZ protein	3.71246
	213111_at	PIP5K3	phosphatidylinositol-3-phosphate/phosphatidylinositol 5-kinase, type III	-2.3656		226934_at			3.70171
	226909_at	KIAA1729	KIAA1729 protein	-2.36597		226650_at	ZFAND2A	zinc finger, AN1-type domain 2A	3.69787
	233085_s_at	OBFC2A	oligonucleotide/oligosaccharide-binding fold containing 2A	-2.37185		226692_at	SERF2	small EDRK-rich factor 2	3.69746
	225139_at	RBM35B	RNA binding motif protein 35B	-2.37255		209928_s_at	MSC	musculin (activated B-cell factor-1)	3.68996
	224791_at	DDEF1	development and differentiation enhancing factor 1	-2.38291		202837_at	TRAFD1	TRAF-type zinc finger domain containing 1	3.66718
	201454_s_at	NPEPPS	aminopeptidase puromycin sensitive	-2.38821		239888_at			3.64664
	214662_at	WDR43	WD repeat domain 43	-2.38822		217645_at	C14orf112	chromosome 14 open reading frame 112	3.64265
	200919_at	PHC2	polyhomeotic homolog 2 (Drosophila)	-2.38955		200676_s_at	UBE2L3	ubiquitin-conjugating enzyme E2L 3	3.64127
	222431_at	SPIN1	spindlin 1	-2.39266		222524_s_at	SENP2	SUMO1/sentrin/SMT3 specific peptidase 2	3.63233
	223092_at	ANKH	ankylosis, progressive homolog (mouse)	-2.39886		36019_at	STK19	serine/threonine kinase 19	3.60679
	202958_at	PTPN9	protein tyrosine phosphatase, non-receptor type 9	-2.39989		232160_s_at	TNIP2	TNFAIP3 interacting protein 2	3.60386
	201519_at	TOMM70A	translocase of outer mitochondrial membrane 70 homolog A (S. cerevisiae)	-2.40019		202734_at	TRIP10	thyroid hormone receptor interactor 10	3.60259
	222700_at	ARL6IP2	ADP-ribosylation factor-like 6 interacting protein 2	-2.40511		204715_at	PANX1	pannexin 1	3.60049
	216996_s_at	FASTKD2	FAST kinase domains 2	-2.40533		218700_s_at	RAB7L1	RAB7, member RAS oncogene family-like 1	3.59792
	224578_at	RCC2	regulator of chromosome condensation 2	-2.40591		1558487_a_at	TMED4	transmembrane emp24 protein transport domain containing 4	3.59577
	224250_s_at	SECISBP2	SECIS binding protein 2	-2.41132		229321_s_at			3.5926
	202181_at	KIAA0247	KIAA0247	-2.41384		210542_s_at	SLCO3A1	solute carrier organic anion transporter family, member 3A1	3.58376
	213031_s_at	WDR73	WD repeat domain 73	-2.41454		237563_s_at	LOC440731	hypothetical LOC440731	3.56869
	226547_at	MYST3	MYST histone acetyltransferase (monocytic leukemia) 3	-2.4158		203378_at	PCF11	PCF11, cleavage and polyadenylation factor subunit, homolog (S. cerevisiae)	3.56854
	226842_at	LOC90110	hypothetical protein LOC90110	-2.41816		52741_at	C14orf172	chromosome 14 open reading frame 172	3.56774
	223819_x_at	COMMD5	COMM domain containing 5	-2.41884		236692_at	LOC729839	similar to DTW domain containing 2	3.56139
	224995_at	SPIRE1	spire homolog 1 (Drosophila)	-2.42012		231861_at	LRP10	low density lipoprotein receptor-related protein 10	3.56066
	227531_at	TMEM165	transmembrane protein 165	-2.4243		218508_at	DCP1A	DCP1 decapping enzyme homolog A (S. cerevisiae)	3.55725
	223222_at	SLC25A19	solute carrier family 25 (mitochondrial thiamine pyrophosphate carrier), member 19	-2.43503		225344_at	NCOA7	nuclear receptor coactivator 7	3.54813
	222656_at	UBE2W	ubiquitin-conjugating enzyme E2W (putative)	-2.43729		226990_at	CAPRIN1	cell cycle associated protein 1	3.54229
	1558620_at	ZNF621	zinc finger protein 621	-2.43773		205811_at	POLG2	polymerase (DNA directed), gamma 2, accessory subunit	3.53261
	235072_s_at			-2.43854		217905_at	C10orf119	chromosome 10 open reading frame 119	3.52743
	221899_at	PFAAP5	phosphonoformate immuno-associated protein 5	-2.43907		219117_s_at	FKBP11	FK506 binding protein 11, 19 kDa	3.5245
	1555841_at	C9orf30	chromosome 9 open reading frame 30	-2.44269		217787_s_at	GALNT2	UDP-N-acetyl-alpha-D-galactosamine:polypeptide N-acetylgalactosaminyltransferase 2 (GalNAc-T2)	3.50866
	200907_s_at	PALLD	palladin, cytoskeletal associated protein	-2.44478		220553_s_at	PRPF39	PRP39 pre-mRNA processing factor 39 homolog (S. cerevisiae)	3.50661
	209682_at	CBLB	Cas-Br-M (murine) ecotropic retroviral transforming sequence b	-2.44943		204170_s_at	CKS2	CDC28 protein kinase regulatory subunit 2	3.5011
	204735_at	PDE4A	phosphodiesterase 4A, cAMP-specific (phosphodiesterase E2 dunce homolog, Drosophila)	-2.45125		203097_s_at	RAPGEF2	Rap guanine nucleotide exchange factor (GEF) 2	3.48554
	222623_s_at	ZNF639	zinc finger protein 639	-2.45658		229366_at	CRBN	cereblon	3.48428
	227031_at			-2.46459		223276_at	MST150	MSTP150	3.48358
	223774_at	C1orf79	chromosome 1 open reading frame 79	-2.46644		228762_at	LFNG	LFNG O-fucosylpeptide 3-beta-N-acetylglucosaminyltransferase	3.47419
	244103_at	C1orf55	chromosome 1 open reading frame 55	-2.47607		222475_at	SAP30BP	SAP30 binding protein	3.46776
	218988_at	SLC35E3	solute carrier family 35, member E3	-2.47666		205568_at	AQP9	aquaporin 9	3.45551
	212516_at	CENTD2	centaurin, delta 2	-2.47845		206907_at	TNFSF9	tumor necrosis factor (ligand) superfamily, member 9	3.44951
	203318_s_at	ZNF148	zinc finger protein 148	-2.4826		205436_s_at	H2AFX	H2A histone family, member X	3.44429
	229285_at	RNASEL	ribonuclease L (2',5'-oligoisoadenylate synthetase-dependent)	-2.48354		203476_at	TPBG	trophoblast glycoprotein	3.44379
	209681_at	SLC19A2	solute carrier family 19 (thiamine transporter), member 2	-2.48531		226183_at			3.43886
	209362_at	MED21	mediator complex subunit 21	-2.48619		205322_s_at	MTF1	metal-regulatory transcription factor 1	3.43726
	212688_at	PIK3CB	phosphoinositide-3-kinase, catalytic, beta polypeptide	-2.48725		212109_at	HN1L	hematological and neurological expressed 1-like	3.43615
	218632_at	HECTD3	HECT domain containing 3	-2.49032		201067_at	PSMC2	proteasome (prosome, macropain) 26S subunit, ATPase, 2	3.43435
	225102_at	MGLL	monoglyceride lipase	-2.49356		200719_at	SKP1A	S-phase kinase-associated protein 1A (p19A)	3.4232
	203087_s_at	KIF2A	kinesin heavy chain member 2A	-2.49377		225657_at	LOC152217	hypothetical protein BC007882	3.41981
	231815_at	PHF12	PHD finger protein 12	-2.49506		1556033_at	LOC727820	hypothetical protein LOC727820	3.41599
	212904_at	LRRC47	leucine rich repeat containing 47	-2.4982		200904_at	HLA-E	major histocompatibility complex, class I, E	3.41566
	223331_s_at	DDX20	DEAD (Asp-Glu-Ala-Asp) box polypeptide 20	-2.49903		235670_at	STX11	syntaxin 11	3.41217
	219716_at	APOL6	apolipoprotein L, 6	-2.50319		213415_at	CLIC2	chloride intracellular channel 2	3.40247
	201794_s_at	SMG7	Smg-7 homolog, nonsense mediated mRNA decay factor (C. elegans)	-2.50332		213526_s_at	LIN37	lin-37 homolog (C. elegans)	3.40012
	202040_s_at	JARID1A	jumonji, AT rich interactive domain 1A	-2.5036		206058_at	SLC6A12	solute carrier family 6 (neurotransmitter transporter, betaine/GABA), member 12	3.39091
	225629_s_at	ZBTB4	zinc finger and BTB domain containing 4	-2.50828		201829_at	NET1	neuroepithelial cell transforming gene 1	3.38706
	206914_at	CRTAM	cytotoxic and regulatory T cell molecule	-2.50898		229350_x_at	PARP10	poly (ADP-ribose) polymerase family, member 10	3.38533
	227527_at	MLL2	myeloid/lymphoid or mixed-lineage leukemia 2	-2.51689		228454_at	LCOR	ligand dependent nuclear receptor corepressor	3.38228
	225405_at	HNRPUL2	heterogeneous nuclear ribonucleoprotein U-like 2	-2.52706		200732_s_at	PTP4A1	protein tyrosine phosphatase type IVA, member 1	3.37984
	214751_at	ZNF468	zinc finger protein 468	-2.53001		202445_s_at	NOTCH2	Notch homolog 2 (Drosophila)	3.37728
	213090_s_at	TAF4	TAF4 RNA polymerase II, TATA box binding protein (TBP)-associated factor, 135kDa	-2.53404		204512_at	HIVEP1	human immunodeficiency virus type I enhancer binding protein 1	3.37059
	204236_at	FLI1	Friend leukemia virus integration 1	-2.53494		235556_at	LOC153222	adult retina protein	3.36883
	209341_s_at	IKBKB	inhibitor of kappa light polypeptide gene enhancer in B-cells, kinase beta	-2.53751		210260_s_at	TNFAIP8	tumor necrosis factor, alpha-induced protein 8	3.36796
	202946_s_at	BTBD3	BTB (POZ) domain containing 3	-2.53914		216977_x_at	SNRPA1	small nuclear ribonucleoprotein polypeptide A'	3.35118
	205006_s_at	NMT2	N-myristoyltransferase 2	-2.54021		200670_at	XBP1	X-box binding protein 1	3.34635
	209308_s_at	BNIP2	BCL2/adenovirus E1B 19kDa interacting protein 2	-2.54127		201449_at	TIA1	TIA1 cytotoxic granule-associated RNA binding protein	3.34099
	210835_s_at	CTBP2	C-terminal binding protein 2	-2.54542		200699_at			3.3375
	222745_s_at	C15orf29	chromosome 15 open reading frame 29	-2.55219		227200_at			3.32897
	218754_at	NOL9	nucleolar protein 9	-2.55284		1568877_a_at	ACBD5	acyl-Coenzyme A binding domain containing 5	3.32804
	212072_s_at	CSNK2A1	casein kinase 2, alpha 1 polypeptide	-2.55529		208499_s_at	DNAJC3	DnaJ (Hsp40) homolog, subfamily C, member 3	3.32736
	204001_at	SNAPC3	small nuclear RNA activating complex, polypeptide 3, 50kDa	-2.55653		212005_at	C1orf144	chromosome 1 open reading frame 144	3.3213
	217844_at	CTDSP1	CTD (carboxy-terminal domain, RNA polymerase II, polypeptide A) small phosphatase 1	-2.56117		1552613_s_at	CDC42SE2	CDC42 small effector 2	3.3212
	221748_s_at	TNS1	tensin 1	-2.5636		223186_at	TMEM189	transmembrane protein 189	3.31012
	213088_s_at	DNAJC9	DnaJ (Hsp40) homolog, subfamily C, member 9	-2.56402		203550_s_at	C1orf2	chromosome 1 open reading frame 2	3.30712
	227027_at			-2.56572		202906_s_at	NBN	nibrin	3.29107
	218911_at	YEATS4	YEATS domain containing 4	-2.5678		201763_s_at	DAXX	death-associated protein 6	3.28948
	227731_at			-2.56937		226784_at	TWISTNB	TWIST neighbor	3.28866
	205707_at	IL17RA	interleukin 17 receptor A	-2.5705		229253_at	THEM4	thioesterase superfamily member 4	3.28486
	212398_at	RDX	radixin	-2.57174		218371_s_at	PSPC1	paraspeckle component 1	3.28244
	225695_at	C2orf18	chromosome 2 open reading frame 18	-2.573		204789_at	FMNL1	formin-like 1	3.2766
	205246_at	PEX13	peroxisome biogenesis factor 13	-2.57323		226201_at	SF3A2	splicing factor 3a, subunit 2, 66kDa	3.27609
	224452_s_at	MGC12966	hypothetical protein LOC84792	-2.57436		209881_s_at	LAT	linker for activation of T cells	3.27601
	213812_s_at	CAMKK2	calcium/calmodulin-dependent protein kinase kinase 2, beta	-2.58006		219210_s_at	RAB8B	RAB8B, member RAS oncogene family	3.2716
	31874_at	GAS2L1	growth arrest-specific 2 like 1	-2.58623		226604_at	TMTC3	transmembrane and tetratricopeptide repeat containing 3	3.2547
	222759_at	SUV420H1	suppressor of variegation 4-20 homolog 1 (Drosophila)	-2.59092		203927_at	NFKBIE	nuclear factor of kappa light polypeptide gene enhancer in B-cells inhibitor, epsilon	3.25359
	221970_s_at	NOL11	nucleolar protein 11	-2.60396		222824_at	SEC61A2	Sec61 alpha 2 subunit (S. cerevisiae)	3.25269
	208328_s_at	MEF2A	myocyte enhancer factor 2A	-2.60569		204958_at	PLK3	polo-like kinase 3 (Drosophila)	3.25
	209180_at	RABGGTB	Rab geranylgeranyltransferase, beta subunit	-2.60674		228505_s_at	TMEM170	transmembrane protein 170	3.23748
	204331_s_at	MRPS12	mitochondrial ribosomal protein S12	-2.61067		1555785_a_at	XRN1	5'-3' exoribonuclease 1	3.23599
	1554414_a_at	OSGIN2	oxidative stress induced growth inhibitor family member 2	-2.62799		200042_at	C22orf28	chromosome 22 open reading frame 28	3.23157
	227131_at	MAP3K3	mitogen-activated protein kinase kinase kinase 3	-2.62879		204070_at	RARRES3	retinoic acid receptor responder (tazarotene induced) 3	3.22933
	203739_at	ZNF217	zinc finger protein 217	-2.62934		201925_s_at	CD55	CD55 molecule, decay accelerating factor for complement (Cromer blood group)	3.2289
	238524_at			-2.63029		218023_s_at	FAM53C	family with sequence similarity 53, member C	3.2171
	226554_at	ZBTB7A	zinc finger and BTB domain containing 7A	-2.63167		205875_s_at	TREX1	three prime repair exonuclease 1	3.21541
	242648_at	KLHL8	kelch-like 8 (Drosophila)	-2.6372		213138_at	ARID5A	AT rich interactive domain 5A (MRF1-like)	3.21318
	218530_at	FHOD1	formin homology 2 domain containing 1	-2.63914		203729_at	EMP3	epithelial membrane protein 3	3.21273
	223023_at	BET1L	blocked early in transport 1 homolog (S. cerevisiae)-like	-2.64135		214706_at	ZNF200	zinc finger protein 200	3.20839
	225530_at	MOBKL2A	MOB1, Mps One Binder kinase activator-like 2A (yeast)	-2.64191		226109_at	C21orf91	chromosome 21 open reading frame 91	3.20136
	218198_at	DHX32	DEAH (Asp-Glu-Ala-His) box polypeptide 32	-2.64604		224927_at	KIAA1949	KIAA1949	3.19271
	200050_at	ZNF146	zinc finger protein 146	-2.64894		210284_s_at	MAP3K7IP2	mitogen-activated protein kinase kinase kinase 7 interacting protein 2	3.18637
	226358_at	LOC145842	hypothetical protein LOC145842	-2.65878		202751_at	TFIP11	tuftelin interacting protein 11	3.18247
	213025_at	THUMPD1	THUMP domain containing 1	-2.66099		225133_at			3.18105
	225024_at	C20orf77	chromosome 20 open reading frame 77	-2.66124		202251_at	PRPF3	PRP3 pre-mRNA processing factor 3 homolog (S. cerevisiae)	3.18049
	223160_s_at	SMEK1	SMEK homolog 1, suppressor of mek1 (Dictyostelium)	-2.66207		53720_at	FLJ11286	hypothetical protein FLJ11286	3.1803
	226528_at	MTX3	metaxin 3	-2.6636		208873_s_at	REEP5	receptor accessory protein 5	3.17306
	209205_s_at	LMO4	LIM domain only 4	-2.67464		217985_s_at	BAZ1A	bromodomain adjacent to zinc finger domain, 1A	3.17096
	210554_s_at	CTBP2	C-terminal binding protein 2	-2.675		219290_x_at	DAPP1	dual adaptor of phosphotyrosine and 3-phosphoinositides	3.16245
	224622_at	TBC1D14	TBC1 domain family, member 14	-2.67593		214084_x_at	NCF1B	neutrophil cytosolic factor 1B pseudogene	3.15523
	212708_at	MSL-1	male-specific lethal-1 homolog	-2.67624		209068_at	HNRPDL	heterogeneous nuclear ribonucleoprotein D-like	3.14797
	200854_at	NCOR1	nuclear receptor co-repressor 1	-2.67637		205945_at	IL6R	interleukin 6 receptor	3.13901
	214948_s_at	TMF1	TATA element modulatory factor 1	-2.67858		228810_at	CCNYL1	cyclin Y-like 1	3.13544
	221985_at	KLHL24	kelch-like 24 (Drosophila)	-2.68007		201364_s_at	OAZ2	ornithine decarboxylase antizyme 2	3.13234
	225318_at	DDHD2	DDHD domain containing 2	-2.68302		201844_s_at	RYBP	RING1 and YY1 binding protein	3.12964
	235146_at			-2.68569		202498_s_at	SLC2A3	solute carrier family 2 (facilitated glucose transporter), member 3	3.10467
	200771_at	LAMC1	laminin, gamma 1 (formerly LAMB2)	-2.687		238765_at	ATP6V1G1	ATPase, H+ transporting, lysosomal 13kDa, V1 subunit G1	3.0985
	1555628_a_at	HAVCR2	hepatitis A virus cellular receptor 2	-2.68943		236526_x_at	FLJ13611	hypothetical protein FLJ13611	3.0916
	227638_at	KIAA1632	KIAA1632	-2.69792		1568763_s_at	LOC728613	programmed cell death protein 6-like	3.0852
	209633_at	PPP2R3A	protein phosphatase 2 (formerly 2A), regulatory subunit B'', alpha	-2.70274		220091_at	SLC2A6	solute carrier family 2 (facilitated glucose transporter), member 6	3.07265
	228768_at	FNIP1	folliculin interacting protein 1	-2.7037		225561_at	SELT	selenoprotein T	3.06879
	227930_at	EIF2C4	eukaryotic translation initiation factor 2C, 4	-2.70586		208686_s_at	BRD2	bromodomain containing 2	3.06866
	209234_at	KIF1B	kinesin family member 1B	-2.70966		206991_s_at	CCR5	chemokine (C-C motif) receptor 5	3.06323
	204458_at	LYPLA3	lysophospholipase 3 (lysosomal phospholipase A2)	-2.71184		201853_s_at	CDC25B	cell division cycle 25 homolog B (S. pombe)	3.05347
	226298_at	RUNDC1	RUN domain containing 1	-2.71197		230634_x_at	SCAMP4	secretory carrier membrane protein 4	3.05267
	213407_at	PHLPPL	PH domain and leucine rich repeat protein phosphatase-like	-2.71335		224868_at	ZDHHC5	zinc finger, DHHC-type containing 5	3.04855
	210054_at	C4orf15	chromosome 4 open reading frame 15	-2.71419		202048_s_at	CBX6	chromobox homolog 6	3.04266
	218211_s_at	MLPH	melanophilin	-2.71421		218240_at	NKIRAS2	NFKB inhibitor interacting Ras-like 2	3.03834
	55081_at	MICALL1	MICAL-like 1	-2.71704		213279_at	DHRS1	dehydrogenase/reductase (SDR family) member 1	3.03152
	204245_s_at	RPP14	ribonuclease P/MRP 14kDa subunit	-2.71784		224605_at	LOC401152	HCV F-transactivated protein 1	3.03006
	218016_s_at	POLR3E	polymerase (RNA) III (DNA directed) polypeptide E (80kD)	-2.71954		222703_s_at	YRDC	yrdC domain containing (E. coli)	3.02898
	201713_s_at	RANBP2	RAN binding protein 2	-2.72266		235427_at			3.02449
	203201_at	PMM2	phosphomannomutase 2	-2.72333		226175_at	TTC9C	tetratricopeptide repeat domain 9C	3.02231
	201479_at	DKC1	dyskeratosis congenita 1, dyskerin	-2.72771		202570_s_at	DLGAP4	discs, large (Drosophila) homolog-associated protein 4	3.01821
	224956_at	NUFIP2	nuclear fragile X mental retardation protein interacting protein 2	-2.72855		222026_at	RBM3	RNA binding motif (RNP1, RRM) protein 3	3.01379
	203286_at	RNF44	ring finger protein 44	-2.72858		210110_x_at	HNRPH3	heterogeneous nuclear ribonucleoprotein H3 (2H9)	3.0121
	201536_at	DUSP3	dual specificity phosphatase 3 (vaccinia virus phosphatase VH1-related)	-2.72976		32099_at	SAFB2	scaffold attachment factor B2	3.00586
	225470_at	NUP35	nucleoporin 35kDa	-2.73708		200800_s_at	HSPA1A	heat shock 70kDa protein 1A	3.00164
	215696_s_at	SEC16A	SEC16 homolog A (S. cerevisiae)	-2.74099		222548_s_at	MAP4K4	mitogen-activated protein kinase kinase kinase kinase 4	2.99727
	212907_at	SLC30A1	solute carrier family 30 (zinc transporter), member 1	-2.74772		223380_s_at	LATS2	LATS, large tumor suppressor, homolog 2 (Drosophila)	2.98193
	222697_s_at	ABHD10	abhydrolase domain containing 10	-2.75111		225897_at			2.98136
	227836_at	C8orf53	chromosome 8 open reading frame 53	-2.75239		207000_s_at	PPP3CC	protein phosphatase 3 (formerly 2B), catalytic subunit, gamma isoform	2.97515
	32259_at	EZH1	enhancer of zeste homolog 1 (Drosophila)	-2.7544		204961_s_at	NCF1	neutrophil cytosolic factor 1, (chronic granulomatous disease, autosomal 1)	2.97182
	223297_at	AMMECR1L	AMME chromosomal region gene 1-like	-2.75922		212666_at	SMURF1	SMAD specific E3 ubiquitin protein ligase 1	2.96864
	208510_s_at	PPARG	peroxisome proliferator-activated receptor gamma	-2.76136		230052_s_at	TA-NFKBH	T-cell activation NFKB-like protein	2.96461
	217862_at	PIAS1	protein inhibitor of activated STAT, 1	-2.76233		242363_at			2.95683
	225033_at	LOC286167	hypothetical protein LOC286167	-2.76764		200749_at	RAN	RAN, member RAS oncogene family	2.95596
	201917_s_at	SLC25A36	solute carrier family 25, member 36	-2.76803		204401_at	KCNN4	potassium intermediate/small conductance calcium-activated channel, subfamily N, member 4	2.94735
	203884_s_at	RAB11FIP2	RAB11 family interacting protein 2 (class I)	-2.77009		203840_at	BLZF1	basic leucine zipper nuclear factor 1 (JEM-1)	2.93976
	239277_at			-2.77436		225752_at	NIPA1	non imprinted in Prader-Willi/Angelman syndrome 1	2.93484
	209606_at	PSCDBP	pleckstrin homology, Sec7 and coiled-coil domains, binding protein	-2.77589		208623_s_at	VIL2	villin 2 (ezrin)	2.93402
	209647_s_at	SOCS5	suppressor of cytokine signaling 5	-2.77778		238469_at			2.93077
	225106_s_at	OGFOD1	2-oxoglutarate and iron-dependent oxygenase domain containing 1	-2.7786		201023_at	TAF7	TAF7 RNA polymerase II, TATA box binding protein (TBP)-associated factor, 55kDa	2.92976
	223305_at	MGC13379	HSPC244	-2.78335		201559_s_at	CLIC4	chloride intracellular channel 4	2.92807
	200961_at	SEPHS2	selenophosphate synthetase 2	-2.78394		207667_s_at	MAP2K3	mitogen-activated protein kinase kinase 3	2.91948
	212375_at	EP400	E1A binding protein p400	-2.78473		226986_at	WIPI2	WD repeat domain, phosphoinositide interacting 2	2.88812
	224922_at	CSNK2A2	casein kinase 2, alpha prime polypeptide	-2.78872		228603_at	LOC440900	hypothetical LOC440900	2.88736
	219284_at	HSPBAP1	HSPB (heat shock 27kDa) associated protein 1	-2.79054		200875_s_at	NOL5A	nucleolar protein 5A (56kDa with KKE/D repeat)	2.8753
	226372_at	CHST11	carbohydrate (chondroitin 4) sulfotransferase 11	-2.79207		226413_at	LOC400027	hypothetical gene supported by BC047417	2.87389
	202677_at	RASA1	RAS p21 protein activator (GTPase activating protein) 1	-2.79317		201466_s_at	JUN	jun oncogene	2.87379
	209193_at	PIM1	pim-1 oncogene	-2.79367		201502_s_at	NFKBIA	nuclear factor of kappa light polypeptide gene enhancer in B-cells inhibitor, alpha	2.87331
	202402_s_at	CARS	cysteinyl-tRNA synthetase	-2.79537		213223_at	RPL28	ribosomal protein L28	2.87318
	204382_at	NAT9	N-acetyltransferase 9	-2.79967		227025_at	PPHLN1	periphilin 1	2.87078
	218733_at	MSL2L1	male-specific lethal 2-like 1 (Drosophila)	-2.80027		222673_x_at	FAM122B	family with sequence similarity 122B	2.86942
	226447_at	ASH1L	ash1 (absent, small, or homeotic)-like (Drosophila)	-2.80657		224574_at	C17orf49	chromosome 17 open reading frame 49	2.86575
	221081_s_at	DENND2D	DENN/MADD domain containing 2D	-2.80771		209065_at	UQCRB	ubiquinol-cytochrome c reductase binding protein	2.86287
	201934_at	WDR82	WD repeat domain 82	-2.80913		244563_at	QSER1	glutamine and serine rich 1	2.86256
	238879_at			-2.80992		221962_s_at	UBE2H	ubiquitin-conjugating enzyme E2H (UBC8 homolog, yeast)	2.8609
	228164_at	AP4E1	adaptor-related protein complex 4, epsilon 1 subunit	-2.81482		235549_at	RNF144B	ring finger 144B	2.85501
	226430_at	RELL1	RELT-like 1	-2.81817		205841_at	JAK2	Janus kinase 2 (a protein tyrosine kinase)	2.84841
	204970_s_at	MAFG	v-maf musculoaponeurotic fibrosarcoma oncogene homolog G (avian)	-2.82536		221249_s_at	FAM117A	family with sequence similarity 117, member A	2.847
	225884_s_at	GZF1	GDNF-inducible zinc finger protein 1	-2.82587		202925_s_at	PLAGL2	pleiomorphic adenoma gene-like 2	2.84639
	202956_at	ARFGEF1	ADP-ribosylation factor guanine nucleotide-exchange factor 1(brefeldin A-inhibited)	-2.82654		209239_at	NFKB1	nuclear factor of kappa light polypeptide gene enhancer in B-cells 1 (p105)	2.84193
	212508_at	MOAP1	modulator of apoptosis 1	-2.82964		209959_at	NR4A3	nuclear receptor subfamily 4, group A, member 3	2.84149
	201642_at	IFNGR2	interferon gamma receptor 2 (interferon gamma transducer 1)	-2.84166		229872_s_at	LOC642441	hypothetical LOC642441	2.83668
	228771_at	ADRBK2	adrenergic, beta, receptor kinase 2	-2.84542		226558_at	LOC727764	similar to Tektin-3	2.8345
	226290_at	BDP1	B double prime 1, subunit of RNA polymerase III transcription initiation factor IIIB	-2.84783		204575_s_at	MMP19	matrix metallopeptidase 19	2.83037
	1554539_a_at	RHOF	ras homolog gene family, member F (in filopodia)	-2.85026		1552790_a_at	TLOC1	translocation protein 1	2.82943
	227087_at			-2.85036		222618_at	SMU1	smu-1 suppressor of mec-8 and unc-52 homolog (C. elegans)	2.81382
	227964_at	FRMD8	FERM domain containing 8	-2.85278		228026_at	SIKE	suppressor of IKK epsilon	2.81182
	226180_at	WDR36	WD repeat domain 36	-2.85434		213296_at	RER1	RER1 retention in endoplasmic reticulum 1 homolog (S. cerevisiae)	2.80503
	212474_at	KIAA0241	KIAA0241	-2.85563		215411_s_at	TRAF3IP2	TRAF3 interacting protein 2	2.80215
	226255_at	ZBTB33	zinc finger and BTB domain containing 33	-2.86317		225222_at	HIAT1	hippocampus abundant transcript 1	2.78503
	214724_at	DIXDC1	DIX domain containing 1	-2.87006		215732_s_at	DTX2	deltex homolog 2 (Drosophila)	2.78191
	222173_s_at	TBC1D2	TBC1 domain family, member 2	-2.87976		218088_s_at	RRAGC	Ras-related GTP binding C	2.7802
	218457_s_at	DNMT3A	DNA (cytosine-5-)-methyltransferase 3 alpha	-2.88036		202000_at	NDUFA6	NADH dehydrogenase (ubiquinone) 1 alpha subcomplex, 6, 14kDa	2.77764
	226636_at	PLD1	phospholipase D1, phosphatidylcholine-specific	-2.88403		212089_at	LMNA	lamin A/C	2.76471
	218356_at	FTSJ2	FtsJ homolog 2 (E. coli)	-2.88723		204181_s_at	ZBTB43	zinc finger and BTB domain containing 43	2.76298
	1555790_a_at	FLJ38482	hypothetical protein FLJ38482	-2.88982		204348_s_at	AK3L1	adenylate kinase 3-like 1	2.7616
	224705_s_at	TNRC6A	trinucleotide repeat containing 6A	-2.893		206034_at	SERPINB8	serpin peptidase inhibitor, clade B (ovalbumin), member 8	2.76007
	203690_at	TUBGCP3	tubulin, gamma complex associated protein 3	-2.89438		214695_at	UBAP2L	ubiquitin associated protein 2-like	2.75809
	226605_at	DGKQ	diacylglycerol kinase, theta 110kDa	-2.8955		216841_s_at	SOD2	superoxide dismutase 2, mitochondrial	2.75591
	222794_x_at	PAPD1	PAP associated domain containing 1	-2.90537		214093_s_at	FUBP1	far upstream element (FUSE) binding protein 1	2.75198
	212855_at	DCUN1D4	DCN1, defective in cullin neddylation 1, domain containing 4 (S. cerevisiae)	-2.91116		227863_at	CTSD	cathepsin D	2.74435
	242366_at	KIAA0701	KIAA0701 protein	-2.91545		202702_at	TRIM26	tripartite motif-containing 26	2.74175
	213649_at	SFRS7	splicing factor, arginine/serine-rich 7, 35kDa	-2.92229		227246_at	PLRG1	pleiotropic regulator 1 (PRL1 homolog, Arabidopsis)	2.74049
	222912_at	ARRB1	arrestin, beta 1	-2.92962		212735_at	KIAA0226	KIAA0226	2.73747
	218737_at	SBNO1	strawberry notch homolog 1 (Drosophila)	-2.93146		227693_at	WDR20	WD repeat domain 20	2.72744
	201103_x_at	XXyac-YX155B6.1	CLIP-190-like	-2.94004		228498_at			2.72608
	224681_at	GNA12	guanine nucleotide binding protein (G protein) alpha 12	-2.94093		224870_at	KIAA0114	KIAA0114	2.72197
	209050_s_at	RALGDS	ral guanine nucleotide dissociation stimulator	-2.94393		222768_s_at	TRMT6	tRNA methyltransferase 6 homolog (S. cerevisiae)	2.7209
	218605_at	TFB2M	transcription factor B2, mitochondrial	-2.94558		218714_at	PRR14	proline rich 14	2.71729
	44696_at	TBC1D13	TBC1 domain family, member 13	-2.94673		221903_s_at	CYLD	cylindromatosis (turban tumor syndrome)	2.70942
	212885_at	MPHOSPH10	M-phase phosphoprotein 10 (U3 small nucleolar ribonucleoprotein)	-2.94943		218669_at	RAP2C	RAP2C, member of RAS oncogene family	2.7082
	219053_s_at	VPS37C	vacuolar protein sorting 37 homolog C (S. cerevisiae)	-2.95082		202843_at	DNAJB9	DnaJ (Hsp40) homolog, subfamily B, member 9	2.70193
	225517_at	ZNF770	zinc finger protein 770	-2.95136		226719_at			2.69981
	235709_at	GAS2L3	growth arrest-specific 2 like 3	-2.95563		202719_s_at	TES	testis derived transcript (3 LIM domains)	2.69861
	224566_at	TncRNA	trophoblast-derived noncoding RNA	-2.95838		228012_at	MATR3	matrin 3	2.69835
	217954_s_at	PHF3	PHD finger protein 3	-2.95908		205260_s_at	ACYP1	acylphosphatase 1, erythrocyte (common) type	2.6979
	218304_s_at	OSBPL11	oxysterol binding protein-like 11	-2.95915		209907_s_at	ITSN2	intersectin 2	2.69764
	1552275_s_at	PXK	PX domain containing serine/threonine kinase	-2.95974		201858_s_at	SRGN	serglycin	2.68883
	226607_at	C20orf194	chromosome 20 open reading frame 194	-2.97166		218401_s_at	ZNF281	zinc finger protein 281	2.67468
	212632_at	STX7	syntaxin 7	-2.97449		208823_s_at	PCTK1	PCTAIRE protein kinase 1	2.67046
	235542_at	hCG_40738	hypothetical protein MGC22014	-2.97467		235587_at	LOC202781	hypothetical protein LOC202781	2.67012
	228106_at	C4orf30	chromosome 4 open reading frame 30	-2.97773		204669_s_at	RNF24	ring finger protein 24	2.66401
	222204_s_at	RRN3	RRN3 RNA polymerase I transcription factor homolog (S. cerevisiae)	-2.97878		226627_at	SEPT8	septin 8	2.6628
	218932_at	C1orf181	chromosome 1 open reading frame 181	-2.98012		218029_at	FAM65A	family with sequence similarity 65, member A	2.6618
	228242_at			-2.981		221021_s_at	CTNNBL1	catenin, beta like 1	2.65992
	222062_at	IL27RA	interleukin 27 receptor, alpha	-2.98128		235727_at	KLHL28	kelch-like 28 (Drosophila)	2.65864
	202106_at	GOLGA3	golgi autoantigen, golgin subfamily a, 3	-2.9829		212390_at	PDE4DIP	phosphodiesterase 4D interacting protein (myomegalin)	2.65797
	225845_at	ZBTB44	zinc finger and BTB domain containing 44	-2.98458		211985_s_at	CALM1	calmodulin 1 (phosphorylase kinase, delta)	2.65769
	201920_at	SLC20A1	solute carrier family 20 (phosphate transporter), member 1	-2.98468		218900_at	CNNM4	cyclin M4	2.65054
	218398_at	MRPS30	mitochondrial ribosomal protein S30	-2.98475		222631_at	PI4K2B	phosphatidylinositol 4-kinase type 2 beta	2.63689
	230078_at	RAPGEF6	Rap guanine nucleotide exchange factor (GEF) 6	-2.98637		212722_s_at	JMJD6	jumonji domain containing 6	2.63408
	222111_at			-2.98815		225711_at	ARL6IP6	ADP-ribosylation-like factor 6 interacting protein 6	2.63378
	218732_at	PTRH2	peptidyl-tRNA hydrolase 2	-2.9883		223089_at	VEZT	vezatin, adherens junctions transmembrane protein	2.63083
	209688_s_at	CCDC93	coiled-coil domain containing 93	-2.98968		228049_x_at			2.63004
	203927_at	NFKBIE	nuclear factor of kappa light polypeptide gene enhancer in B-cells inhibitor, epsilon	-2.9933		203274_at	F8A1	coagulation factor VIII-associated (intronic transcript) 1	2.62627
	203651_at	ZFYVE16	zinc finger, FYVE domain containing 16	-2.99534		55692_at	ELMO2	engulfment and cell motility 2	2.62116
	228991_at			-2.99734		223330_s_at	SUGT1	SGT1, suppressor of G2 allele of SKP1 (S. cerevisiae)	2.61902
	225980_at	C14orf43	chromosome 14 open reading frame 43	-2.99931		227731_at			2.60807
	202386_s_at	KIAA0430	KIAA0430	-3.00029		218177_at	CHMP1B	chromatin modifying protein 1B	2.60354
	213538_at	SON	SON DNA binding protein	-3.00769		220251_at	C1orf107	chromosome 1 open reading frame 107	2.59039
	218626_at	EIF4ENIF1	eukaryotic translation initiation factor 4E nuclear import factor 1	-3.00928		208747_s_at	C1S	complement component 1, s subcomponent	2.58222
	218245_at	TSKU	tsukushin	-3.00951		226566_at	TRIM11	tripartite motif-containing 11	2.5776
	225919_s_at	C9orf72	chromosome 9 open reading frame 72	-3.00986		242750_at	MMAA	methylmalonic aciduria (cobalamin deficiency) cblA type	2.57333
	205891_at	ADORA2B	adenosine A2b receptor	-3.01418		212928_at	TSPYL4	TSPY-like 4	2.55982
	218648_at	CRTC3	CREB regulated transcription coactivator 3	-3.01604		221485_at	B4GALT5	UDP-Gal:betaGlcNAc beta 1,4- galactosyltransferase, polypeptide 5	2.55906
	214449_s_at	RHOQ	ras homolog gene family, member Q	-3.01726		203956_at	MORC2	MORC family CW-type zinc finger 2	2.55304
	212846_at	RRP1B	ribosomal RNA processing 1 homolog B (S. cerevisiae)	-3.01952		209475_at	USP15	ubiquitin specific peptidase 15	2.55133
	219988_s_at	C1orf164	chromosome 1 open reading frame 164	-3.02095		205773_at	CPEB3	cytoplasmic polyadenylation element binding protein 3	2.55113
	226867_at	DENND4C	DENN/MADD domain containing 4C	-3.02101		227993_at	METAP2	methionyl aminopeptidase 2	2.54788
	202798_at	SEC24B	SEC24 related gene family, member B (S. cerevisiae)	-3.03149		207181_s_at	CASP7	caspase 7, apoptosis-related cysteine peptidase	2.54644
	224714_at	MKI67IP	MKI67 (FHA domain) interacting nucleolar phosphoprotein	-3.03469		211061_s_at	MGAT2	mannosyl (alpha-1,6-)-glycoprotein beta-1,2-N-acetylglucosaminyltransferase	2.54618
	225192_at	C10orf46	chromosome 10 open reading frame 46	-3.04078		200920_s_at	BTG1	B-cell translocation gene 1, anti-proliferative	2.54449
	225099_at	FBXO45	F-box protein 45	-3.04686		203026_at	ZBTB5	zinc finger and BTB domain containing 5	2.54446
	202822_at	LPP	LIM domain containing preferred translocation partner in lipoma	-3.05773		206247_at	MICB	MHC class I polypeptide-related sequence B	2.54187
	221844_x_at			-3.06578		1554966_a_at	FILIP1L	filamin A interacting protein 1-like	2.53322
	227507_at	ZNF592	zinc finger protein 592	-3.06993		226773_at			2.52606
	213376_at	ZBTB1	zinc finger and BTB domain containing 1	-3.07301		225075_at	PDRG1	p53 and DNA damage regulated 1	2.52258
	218634_at	PHLDA3	pleckstrin homology-like domain, family A, member 3	-3.07305		224780_at	RBM17	RNA binding motif protein 17	2.52233
	221755_at	EHBP1L1	EH domain binding protein 1-like 1	-3.07449		212185_x_at	MT2A	metallothionein 2A	2.51938
	209257_s_at	SMC3	structural maintenance of chromosomes 3	-3.07491		221208_s_at	C11orf61	chromosome 11 open reading frame 61	2.51813
	214949_at			-3.07695		209034_at	PNRC1	proline-rich nuclear receptor coactivator 1	2.51233
	200618_at	LASP1	LIM and SH3 protein 1	-3.07722		204141_at	TUBB2A	tubulin, beta 2A	2.51082
	203156_at	AKAP11	A kinase (PRKA) anchor protein 11	-3.08313		221534_at	C11orf68	chromosome 11 open reading frame 68	2.50976
	203906_at	IQSEC1	IQ motif and Sec7 domain 1	-3.09299		218322_s_at	ACSL5	acyl-CoA synthetase long-chain family member 5	2.50535
	226881_at	GRPEL2	GrpE-like 2, mitochondrial (E. coli)	-3.09921		225553_at			2.49486
	208322_s_at	ST3GAL1	ST3 beta-galactoside alpha-2,3-sialyltransferase 1	-3.10234		206583_at	ZNF673	zinc finger protein 673	2.49191
	212658_at	LHFPL2	lipoma HMGIC fusion partner-like 2	-3.11109		41512_at			2.48262
	202706_s_at	UMPS	uridine monophosphate synthetase (orotate phosphoribosyl transferase and orotidine-5'-decarboxylase)	-3.11198		213546_at	DKFZp586I1420	hypothetical protein DKFZp586I1420	2.47541
	225789_at	CENTG3	centaurin, gamma 3	-3.12245		218694_at	ARMCX1	armadillo repeat containing, X-linked 1	2.47081
	209236_at	SLC23A2	solute carrier family 23 (nucleobase transporters), member 2	-3.12327		223146_at	WDR33	WD repeat domain 33	2.45301
	221751_at	SLC2A3P1	solute carrier family 2 (facilitated glucose transporter), member 3 pseudogene 1	-3.12687		242300_at			2.43851
	226508_at	PHC3	polyhomeotic homolog 3 (Drosophila)	-3.12728		225077_at	CHD2	chromodomain helicase DNA binding protein 2	2.43051
	209565_at	RNF113A	ring finger protein 113A	-3.13068		201855_s_at	ASCIZ	ATM/ATR-Substrate Chk2-Interacting Zn2+-finger protein	2.42948
	227936_at	TMEM68	transmembrane protein 68	-3.13578		217765_at	NRBP1	nuclear receptor binding protein 1	2.42342
	221736_at	KIAA1219	KIAA1219	-3.13957		222691_at	SLC35B3	solute carrier family 35, member B3	2.42331
	218518_at	C5orf5	chromosome 5 open reading frame 5	-3.15154		206059_at	ZNF91	zinc finger protein 91	2.41228
	201675_at	AKAP1	A kinase (PRKA) anchor protein 1	-3.15214		200623_s_at	CALM3	calmodulin 3 (phosphorylase kinase, delta)	2.41014
	221522_at	ANKRD27	ankyrin repeat domain 27 (VPS9 domain)	-3.1576		221656_s_at	ARHGEF10L	Rho guanine nucleotide exchange factor (GEF) 10-like	2.40984
	203707_at	ZNF263	zinc finger protein 263	-3.17715		228760_at	SFRS2B	splicing factor, arginine/serine-rich 2B	2.40032
	241344_at	GLB1	galactosidase, beta 1	-3.18363		202512_s_at	ATG5	ATG5 autophagy related 5 homolog (S. cerevisiae)	2.39658
	227396_at	PTPRJ	protein tyrosine phosphatase, receptor type, J	-3.18581		223016_x_at	ZRANB2	zinc finger, RAN-binding domain containing 2	2.39348
	241068_at			-3.18764		208890_s_at	PLXNB2	plexin B2	2.39274
	212635_at	TNPO1	transportin 1	-3.1888		214440_at	NAT1	N-acetyltransferase 1 (arylamine N-acetyltransferase)	2.39172
	213612_x_at	NBPF12	neuroblastoma breakpoint family, member 12	-3.18919		216903_s_at	CBARA1	calcium binding atopy-related autoantigen 1	2.37772
	224938_at			-3.1944		206874_s_at			2.37633
	38918_at	SOX13	SRY (sex determining region Y)-box 13	-3.21124		217750_s_at	UBE2Z	ubiquitin-conjugating enzyme E2Z	2.36565
	219299_at	TRMT12	tRNA methyltransferase 12 homolog (S. cerevisiae)	-3.21294		31845_at	ELF4	E74-like factor 4 (ets domain transcription factor)	2.36263
	203544_s_at	STAM	signal transducing adaptor molecule (SH3 domain and ITAM motif) 1	-3.21909		224232_s_at	PRELID1	PRELI domain containing 1	2.36117
	212479_s_at	RMND5A	required for meiotic nuclear division 5 homolog A (S. cerevisiae)	-3.22		218283_at	SS18L2	synovial sarcoma translocation gene on chromosome 18-like 2	2.3584
	213168_at	SP3	Sp3 transcription factor	-3.2263		203090_at	SDF2	stromal cell-derived factor 2	2.35255
	229295_at	LOC150166	hypothetical protein LOC150166	-3.22691		228063_s_at	NAP1L5	nucleosome assembly protein 1-like 5	2.33653
	224318_s_at	FLJ10081	hypothetical protein FLJ10081	-3.23048		228244_at			2.33335
	225365_at	ZDHHC20	zinc finger, DHHC-type containing 20	-3.23178		229174_at	C3orf38	chromosome 3 open reading frame 38	2.318
	226738_at	WDR81	WD repeat domain 81	-3.23472		216396_s_at	EI24	etoposide induced 2.4 mRNA	2.30857
	204790_at	SMAD7	SMAD family member 7	-3.23536		211988_at	SMARCE1	SWI/SNF related, matrix associated, actin dependent regulator of chromatin, subfamily e, member 1	2.30809
	201104_x_at	NBPF14	neuroblastoma breakpoint family, member 14	-3.24004		220140_s_at	SNX11	sorting nexin 11	2.30547
	225160_x_at	MGC5370	hypothetical protein MGC5370	-3.24268		229937_x_at	LILRB1	leukocyte immunoglobulin-like receptor, subfamily B (with TM and ITIM domains), member 1	2.30383
	225356_at			-3.25418		224606_at	KLF6	Kruppel-like factor 6	2.299
	225935_at	CUTL1	cut-like 1, CCAAT displacement protein (Drosophila)	-3.25587		202304_at	FNDC3A	fibronectin type III domain containing 3A	2.29572
	222791_at	RSBN1	round spermatid basic protein 1	-3.2649		201181_at	GNAI3	guanine nucleotide binding protein (G protein), alpha inhibiting activity polypeptide 3	2.2812
	37152_at	PPARD	peroxisome proliferator-activated receptor delta	-3.2662		224784_at	MLLT6	myeloid/lymphoid or mixed-lineage leukemia (trithorax homolog, Drosophila); translocated to, 6	2.26081
	214011_s_at	HSPC111	hypothetical protein HSPC111	-3.26862		225775_at	TSPAN33	tetraspanin 33	2.25925
	219031_s_at	NIP7	nuclear import 7 homolog (S. cerevisiae)	-3.27103		207765_s_at	KIAA1539	KIAA1539	2.25509
	221864_at	ORAI3	ORAI calcium release-activated calcium modulator 3	-3.27889		206235_at	LIG4	ligase IV, DNA, ATP-dependent	2.24157
	204172_at	CPOX	coproporphyrinogen oxidase	-3.28111		222402_at	POMP	proteasome maturation protein	2.23627
	200702_s_at	DDX24	DEAD (Asp-Glu-Ala-Asp) box polypeptide 24	-3.28152		202630_at	APPBP2	amyloid beta precursor protein (cytoplasmic tail) binding protein 2	2.22365
	226219_at	ARHGAP30	Rho GTPase activating protein 30	-3.28466		220127_s_at	FBXL12	F-box and leucine-rich repeat protein 12	2.21926
	218803_at	CHFR	checkpoint with forkhead and ring finger domains	-3.28914		219141_s_at	FLJ20294	hypothetical protein FLJ20294	2.21591
	227117_at			-3.29481		227808_at	DNAJC15	DnaJ (Hsp40) homolog, subfamily C, member 15	2.21247
	227518_at	SLC35E1	solute carrier family 35, member E1	-3.29903		229120_s_at	C1orf56	chromosome 1 open reading frame 56	2.20924
	218819_at	INTS6	integrator complex subunit 6	-3.30764		219966_x_at	BANP	BTG3 associated nuclear protein	2.15953
	225007_at			-3.31601		210213_s_at	EIF6	eukaryotic translation initiation factor 6	2.15579
	219457_s_at	RIN3	Ras and Rab interactor 3	-3.31646		208938_at	PRCC	papillary renal cell carcinoma (translocation-associated)	2.13337
	238668_at			-3.31941		202819_s_at	TCEB3	transcription elongation factor B (SIII), polypeptide 3 (110kDa, elongin A)	2.08555
	212672_at	ATM	ataxia telangiectasia mutated	-3.31942		227357_at	MAP3K7IP3	mitogen-activated protein kinase kinase kinase 7 interacting protein 3	2.0476
	227143_s_at	BID	BH3 interacting domain death agonist	-3.32323		203227_s_at	TSPAN31	tetraspanin 31	-2.04564
	213294_at			-3.335		231784_s_at	WDSOF1	WD repeats and SOF1 domain containing	-2.06969
	218757_s_at	UPF3B	UPF3 regulator of nonsense transcripts homolog B (yeast)	-3.33781		219161_s_at	CKLF	chemokine-like factor	-2.0814
	217853_at	TNS3	tensin 3	-3.34179		224445_s_at	ZFYVE21	zinc finger, FYVE domain containing 21	-2.08331
	1556000_s_at	BTBD7	BTB (POZ) domain containing 7	-3.342		203615_x_at	SULT1A1	sulfotransferase family, cytosolic, 1A, phenol-preferring, member 1	-2.09065
	225927_at	MAP3K1	mitogen-activated protein kinase kinase kinase 1	-3.34812		226743_at	SLFN11	schlafen family member 11	-2.1153
	212893_at	ZZZ3	zinc finger, ZZ-type containing 3	-3.34963		205415_s_at	ATXN3	ataxin 3	-2.12101
	202449_s_at	RXRA	retinoid X receptor, alpha	-3.35364		207508_at	ATP5G3	ATP synthase, H+ transporting, mitochondrial F0 complex, subunit C3 (subunit 9)	-2.14382
	218486_at	KLF11	Kruppel-like factor 11	-3.35656		212117_at	PIGF	phosphatidylinositol glycan anchor biosynthesis, class F	-2.14838
	229173_at			-3.36474		212711_at	CAMSAP1	calmodulin regulated spectrin-associated protein 1	-2.16525
	219007_at	NUP43	nucleoporin 43kDa	-3.36644		202124_s_at	TRAK2	trafficking protein, kinesin binding 2	-2.16897
	243099_at	NFAM1	NFAT activating protein with ITAM motif 1	-3.36811		218684_at	LRRC8D	leucine rich repeat containing 8 family, member D	-2.17884
	218071_s_at	MKRN2	makorin, ring finger protein, 2	-3.36965		201658_at	ARL1	ADP-ribosylation factor-like 1	-2.1905
	226143_at	RAI1	retinoic acid induced 1	-3.37043		201734_at	CLCN3	chloride channel 3	-2.19086
	212910_at	THAP11	THAP domain containing 11	-3.37557		229519_at	FXR1	fragile X mental retardation, autosomal homolog 1	-2.2012
	200083_at	USP22	ubiquitin specific peptidase 22	-3.37913		226430_at	RELL1	RELT-like 1	-2.20335
	224978_s_at	USP36	ubiquitin specific peptidase 36	-3.38787		212254_s_at	DST	dystonin	-2.21882
	233559_s_at	WDFY1	WD repeat and FYVE domain containing 1	-3.38856		201420_s_at	WDR77	WD repeat domain 77	-2.22246
	218421_at	CERK	ceramide kinase	-3.39118		201380_at	CRTAP	cartilage associated protein	-2.22824
	204957_at	ORC5L	origin recognition complex, subunit 5-like (yeast)	-3.39294		203746_s_at	HCCS	holocytochrome c synthase (cytochrome c heme-lyase)	-2.23132
	228446_at	KIAA2026	KIAA2026	-3.39863		210153_s_at	ME2	malic enzyme 2, NAD(+)-dependent, mitochondrial	-2.23196
	219901_at	FGD6	FYVE, RhoGEF and PH domain containing 6	-3.40817		221059_s_at	CHST6	carbohydrate (N-acetylglucosamine 6-O) sulfotransferase 6	-2.24651
	212205_at	H2AFV	H2A histone family, member V	-3.41126		226883_at			-2.24813
	231894_at	SARS	seryl-tRNA synthetase	-3.41555		203200_s_at	MTRR	5-methyltetrahydrofolate-homocysteine methyltransferase reductase	-2.25977
	235022_at	C18orf19	chromosome 18 open reading frame 19	-3.42646		201000_at	AARS	alanyl-tRNA synthetase	-2.26175
	230748_at	SLC16A6	solute carrier family 16, member 6 (monocarboxylic acid transporter 7)	-3.42813		226842_at	LOC90110	hypothetical protein LOC90110	-2.26491
	237444_at			-3.43423		203039_s_at	NDUFS1	NADH dehydrogenase (ubiquinone) Fe-S protein 1, 75kDa (NADH-coenzyme Q reductase)	-2.28104
	223019_at	FAM129B	family with sequence similarity 129, member B	-3.43833		205412_at	ACAT1	acetyl-Coenzyme A acetyltransferase 1 (acetoacetyl Coenzyme A thiolase)	-2.28499
	212978_at	LRRC8B	leucine rich repeat containing 8 family, member B	-3.43939		226083_at	TMEM70	transmembrane protein 70	-2.28672
	204700_x_at	C1orf107	chromosome 1 open reading frame 107	-3.43996		224581_s_at			-2.29215
	209717_at	EVI5	ecotropic viral integration site 5	-3.44186		209092_s_at	GLOD4	glyoxalase domain containing 4	-2.29464
	225992_at	MLLT10	myeloid/lymphoid or mixed-lineage leukemia (trithorax homolog, Drosophila); translocated to, 10	-3.44612		39729_at	PRDX2	peroxiredoxin 2	-2.30139
	209489_at	CUGBP1	CUG triplet repeat, RNA binding protein 1	-3.44987		221726_at	RPL22	ribosomal protein L22	-2.30909
	204725_s_at	NCK1	NCK adaptor protein 1	-3.45086		204227_s_at	TK2	thymidine kinase 2, mitochondrial	-2.31571
	204436_at	PLEKHQ1	pleckstrin homology domain containing, family Q member 1	-3.45257		201938_at	CDK2AP1	CDK2-associated protein 1	-2.31722
	224481_s_at	HECTD1	HECT domain containing 1	-3.45562		207270_x_at	CD300C	CD300c molecule	-2.32362
	203057_s_at	PRDM2	PR domain containing 2, with ZNF domain	-3.4564		210740_s_at	ITPK1	inositol 1,3,4-triphosphate 5/6 kinase	-2.3281
	209501_at	CDR2	cerebellar degeneration-related protein 2, 62kDa	-3.45788		1555349_a_at	ITGB2	integrin, beta 2 (complement component 3 receptor 3 and 4 subunit)	-2.33413
	201373_at	PLEC1	plectin 1, intermediate filament binding protein 500kDa	-3.46474		223507_at	CLPX	ClpX caseinolytic peptidase X homolog (E. coli)	-2.35364
	214054_at	DOK2	docking protein 2, 56kDa	-3.46836		218740_s_at	CDK5RAP3	CDK5 regulatory subunit associated protein 3	-2.35397
	223018_at	NOB1	NIN1/RPN12 binding protein 1 homolog (S. cerevisiae)	-3.47325		225798_at	JAZF1	JAZF zinc finger 1	-2.36376
	226000_at	CTTNBP2NL	CTTNBP2 N-terminal like	-3.47482		223035_s_at	FARSB	phenylalanyl-tRNA synthetase, beta subunit	-2.36743
	207992_s_at	AMPD3	adenosine monophosphate deaminase (isoform E)	-3.48129		201736_s_at	C3HC46	membrane-associated ring finger (C3HC4) 6	-2.36813
	209422_at	PHF20	PHD finger protein 20	-3.48218		218098_at			-2.36879
	223056_s_at	XPO5	exportin 5	-3.48364		224819_at	TCEAL8	transcription elongation factor A (SII)-like 8	-2.37488
	220934_s_at	MGC3196	hypothetical protein MGC3196	-3.48439		224651_at	CCNY	cyclin Y	-2.37822
	203693_s_at	E2F3	E2F transcription factor 3	-3.48518		223253_at	EPDR1	ependymin related protein 1 (zebrafish)	-2.38314
	224778_s_at			-3.48529		219952_s_at	MCOLN1	mucolipin 1	-2.38729
	203521_s_at	ZNF318	zinc finger protein 318	-3.48942		202534_x_at	DHFR	dihydrofolate reductase	-2.38882
	219286_s_at	RBM15	RNA binding motif protein 15	-3.49939		203327_at	IDE	insulin-degrading enzyme	-2.39003
	223804_s_at	THUMPD3	THUMP domain containing 3	-3.50726		53071_s_at	FLJ22222	hypothetical protein FLJ22222	-2.39124
	221746_at	UBL4A	ubiquitin-like 4A	-3.51787		209444_at	RAP1GDS1	RAP1, GTP-GDP dissociation stimulator 1	-2.39186
	233970_s_at	TRMT6	tRNA methyltransferase 6 homolog (S. cerevisiae)	-3.51828		221523_s_at	RRAGD	Ras-related GTP binding D	-2.40223
	36865_at	ANGEL1	angel homolog 1 (Drosophila)	-3.52175		235458_at	HAVCR2	hepatitis A virus cellular receptor 2	-2.4034
	225337_at	ABHD2	abhydrolase domain containing 2	-3.53157		221931_s_at	SEH1L	SEH1-like (S. cerevisiae)	-2.40355
	202657_s_at	SERTAD2	SERTA domain containing 2	-3.53475		224583_at	COTL1	coactosin-like 1 (Dictyostelium)	-2.4133
	228543_at	CSRP2BP	CSRP2 binding protein	-3.53611		225845_at	ZBTB44	zinc finger and BTB domain containing 44	-2.43083
	235315_at	TSC22D1	TSC22 domain family, member 1	-3.54117		219770_at	GTDC1	glycosyltransferase-like domain containing 1	-2.43795
	201013_s_at	PAICS	phosphoribosylaminoimidazole carboxylase, phosphoribosylaminoimidazole succinocarboxamide synthetase	-3.55815		222483_at	EFHD2	EF-hand domain family, member D2	-2.44006
	205340_at	ZBTB24	zinc finger and BTB domain containing 24	-3.55925		205823_at	RGS12	regulator of G-protein signaling 12	-2.44011
	202530_at	MAPK14	mitogen-activated protein kinase 14	-3.56378		201568_at	UQCRQ	ubiquinol-cytochrome c reductase, complex III subunit VII, 9.5kDa	-2.44601
	224804_s_at	C15orf17	chromosome 15 open reading frame 17	-3.58284		200842_s_at	EPRS	glutamyl-prolyl-tRNA synthetase	-2.44771
	221858_at	TBC1D12	TBC1 domain family, member 12	-3.58976		212415_at	SEPT6	septin 6	-2.452
	212499_s_at	C14orf32	chromosome 14 open reading frame 32	-3.59186		222730_s_at	ZDHHC2	zinc finger, DHHC-type containing 2	-2.45398
	229742_at	LOC145853	hypothetical LOC145853	-3.60162		202026_at	SDHD	succinate dehydrogenase complex, subunit D, integral membrane protein	-2.4567
	213073_at	ZFYVE26	zinc finger, FYVE domain containing 26	-3.60322		226073_at	LOC219854	hypothetical protein LOC219854	-2.46369
	228456_s_at	LOC149832	hypothetical protein LOC149832	-3.61869		218099_at	TEX2	testis expressed 2	-2.46886
	226509_at	ZNF641	zinc finger protein 641	-3.61966		202371_at	TCEAL4	transcription elongation factor A (SII)-like 4	-2.46905
	224881_at	VKORC1L1	vitamin K epoxide reductase complex, subunit 1-like 1	-3.62706		223099_s_at	LONP2	lon peptidase 2, peroxisomal	-2.46955
	225030_at	FAM44B	family with sequence similarity 44, member B	-3.64378		212213_x_at	OPA1	optic atrophy 1 (autosomal dominant)	-2.47042
	1554966_a_at	FILIP1L	filamin A interacting protein 1-like	-3.64439		207081_s_at	PI4KA	phosphatidylinositol 4-kinase, catalytic, alpha	-2.48084
	213135_at	TIAM1	T-cell lymphoma invasion and metastasis 1	-3.64554		218235_s_at	UTP11L	UTP11-like, U3 small nucleolar ribonucleoprotein, (yeast)	-2.4853
	204568_at	KIAA0831	KIAA0831	-3.64712		218633_x_at	ABHD10	abhydrolase domain containing 10	-2.48969
	242230_at	ATXN1	ataxin 1	-3.64735		209003_at	SLC25A11	solute carrier family 25 (mitochondrial carrier; oxoglutarate carrier), member 11	-2.50096
	225971_at			-3.65422		226538_at	MAN2A1	mannosidase, alpha, class 2A, member 1	-2.50136
	223758_s_at	GTF2H2	general transcription factor IIH, polypeptide 2, 44kDa	-3.65614		212155_at	RNF187	ring finger protein 187	-2.50215
	227026_at	HSMPP8	M-phase phosphoprotein, mpp8	-3.65629		212958_x_at	PAM	peptidylglycine alpha-amidating monooxygenase	-2.50573
	225283_at	ARRDC4	arrestin domain containing 4	-3.65959		218046_s_at	MRPS16	mitochondrial ribosomal protein S16	-2.51322
	212560_at	SORL1	sortilin-related receptor, L(DLR class) A repeats-containing	-3.66578		223576_at	C6orf203	chromosome 6 open reading frame 203	-2.51344
	225558_at	GIT2	G protein-coupled receptor kinase interactor 2	-3.6853		216594_x_at	AKR1C1	aldo-keto reductase family 1, member C1 (dihydrodiol dehydrogenase 1; 20-alpha (3-alpha)-hydroxysteroid dehydrogenase)	-2.51532
	231896_s_at	DENR	density-regulated protein	-3.68541		202916_s_at	FAM20B	family with sequence similarity 20, member B	-2.51549
	225189_s_at	RAPH1	Ras association (RalGDS/AF-6) and pleckstrin homology domains 1	-3.69953		225395_s_at	FAM120AOS	family with sequence similarity 120A opposite strand	-2.51936
	235534_at			-3.71301		225851_at	FNTB	farnesyltransferase, CAAX box, beta	-2.51953
	225479_at	LRRC58	leucine rich repeat containing 58	-3.72389		222633_at	TBL1XR1	transducin (beta)-like 1X-linked receptor 1	-2.52072
	239294_at			-3.73976		204479_at	OSTF1	osteoclast stimulating factor 1	-2.52912
	226978_at	PPARA	peroxisome proliferator-activated receptor alpha	-3.73986		203253_s_at	HISPPD1	histidine acid phosphatase domain containing 1	-2.52944
	222393_s_at	NAT13	N-acetyltransferase 13	-3.743		221530_s_at	BHLHB3	basic helix-loop-helix domain containing, class B, 3	-2.52992
	228315_at			-3.76035		215091_s_at	GTF3A	general transcription factor IIIA	-2.53012
	238462_at	STS-1	Cbl-interacting protein Sts-1	-3.76269		225092_at	NUP88	nucleoporin 88kDa	-2.54169
	228914_at			-3.77282		204616_at	UCHL3	ubiquitin carboxyl-terminal esterase L3 (ubiquitin thiolesterase)	-2.55003
	226579_at	KLC1	kinesin light chain 1	-3.78242		205761_s_at	DUS4L	dihydrouridine synthase 4-like (S. cerevisiae)	-2.56134
	224518_s_at	ZNF559	zinc finger protein 559	-3.78578		208758_at	ATIC	5-aminoimidazole-4-carboxamide ribonucleotide formyltransferase/IMP cyclohydrolase	-2.56369
	214693_x_at	NBPF10	neuroblastoma breakpoint family, member 10	-3.78853		209605_at	TST	thiosulfate sulfurtransferase (rhodanese)	-2.56389
	202855_s_at	SLC16A3	solute carrier family 16, member 3 (monocarboxylic acid transporter 4)	-3.80143		213398_s_at	C14orf124	chromosome 14 open reading frame 124	-2.56596
	226816_s_at	KIAA1143	KIAA1143	-3.80208		201362_at	IVNS1ABP	influenza virus NS1A binding protein	-2.57421
	1555762_s_at	MKL1	megakaryoblastic leukemia (translocation) 1	-3.80677		220486_x_at	TMEM164	transmembrane protein 164	-2.57992
	203957_at	E2F6	E2F transcription factor 6	-3.80854		229699_at			-2.58608
	221877_at			-3.80935		200931_s_at	VCL	vinculin	-2.59686
	212333_at	FAM98A	family with sequence similarity 98, member A	-3.80979		226119_at	PCMTD1	protein-L-isoaspartate (D-aspartate) O-methyltransferase domain containing 1	-2.59887
	209240_at	OGT	O-linked N-acetylglucosamine (GlcNAc) transferase (UDP-N-acetylglucosamine:polypeptide-N-acetylglucosaminyl transferase)	-3.82127		204112_s_at	HNMT	histamine N-methyltransferase	-2.59954
	212137_at	LARP1	La ribonucleoprotein domain family, member 1	-3.82388		206833_s_at	ACYP2	acylphosphatase 2, muscle type	-2.60142
	232103_at	BPNT1	3'(2'), 5'-bisphosphate nucleotidase 1	-3.82454		218271_s_at	PARL	presenilin associated, rhomboid-like	-2.60211
	228559_at	CENPN	centromere protein N	-3.82477		223824_at	C10orf59	chromosome 10 open reading frame 59	-2.62029
	222481_at	FXC1	fracture callus 1 homolog (rat)	-3.82782		202950_at	CRYZ	crystallin, zeta (quinone reductase)	-2.62199
	223113_at	TMEM138	transmembrane protein 138	-3.83293		225127_at	TMEM181	transmembrane protein 181	-2.63648
	219006_at	C6orf66	chromosome 6 open reading frame 66	-3.84899		220948_s_at	ATP1A1	ATPase, Na+/K+ transporting, alpha 1 polypeptide	-2.6365
	216563_at	ANKRD12	ankyrin repeat domain 12	-3.86994		204168_at	MGST2	microsomal glutathione S-transferase 2	-2.63689
	212295_s_at	SLC7A1	solute carrier family 7 (cationic amino acid transporter, y+ system), member 1	-3.87195		216941_s_at	TAF1B	TATA box binding protein (TBP)-associated factor, RNA polymerase I, B, 63kDa	-2.63734
	217832_at	SYNCRIP	synaptotagmin binding, cytoplasmic RNA interacting protein	-3.87721		226954_at	UBE2R2	ubiquitin-conjugating enzyme E2R 2	-2.64425
	225718_at	KIAA1715	KIAA1715	-3.87731		223227_at	BBS2	Bardet-Biedl syndrome 2	-2.64785
	233557_s_at	MON1B	MON1 homolog B (yeast)	-3.87861		209184_s_at	IRS2	insulin receptor substrate 2	-2.65146
	217925_s_at	C6orf106	chromosome 6 open reading frame 106	-3.88486		217777_s_at	PTPLAD1	protein tyrosine phosphatase-like A domain containing 1	-2.65571
	219526_at	C14orf169	chromosome 14 open reading frame 169	-3.88573		203060_s_at	PAPSS2	3'-phosphoadenosine 5'-phosphosulfate synthase 2	-2.65952
	219496_at	ANKRD57	ankyrin repeat domain 57	-3.8903		218109_s_at	MFSD1	major facilitator superfamily domain containing 1	-2.66027
	221902_at	GPR153	G protein-coupled receptor 153	-3.89366		211961_s_at	RAB7A	RAB7A, member RAS oncogene family	-2.66097
	235767_x_at			-3.89689		224861_at	GNAQ	guanine nucleotide binding protein (G protein), q polypeptide	-2.66565
	225163_at	FRMD4A	FERM domain containing 4A	-3.89704		224523_s_at	C3orf26	chromosome 3 open reading frame 26	-2.66577
	226683_at	SNAG1	sorting nexin associated golgi protein 1	-3.91018		214919_s_at	ANKHD1	ankyrin repeat and KH domain containing 1	-2.66623
	64488_at			-3.91163		223155_at	HDHD2	haloacid dehalogenase-like hydrolase domain containing 2	-2.66701
	210275_s_at	ZFAND5	zinc finger, AN1-type domain 5	-3.91276		223320_s_at	ABCB10	ATP-binding cassette, sub-family B (MDR/TAP), member 10	-2.6706
	218412_s_at	GTF2IRD1	GTF2I repeat domain containing 1	-3.9181		212055_at	C18orf10	chromosome 18 open reading frame 10	-2.6743
	226895_at	NFIC	nuclear factor I/C (CCAAT-binding transcription factor)	-3.92143		204357_s_at	LIMK1	LIM domain kinase 1	-2.6794
	220305_at	MGC3260	hypothetical protein MGC3260	-3.92863		226875_at	DOCK11	dedicator of cytokinesis 11	-2.6803
	219558_at	ATP13A3	ATPase type 13A3	-3.93339		225841_at	C1orf59	chromosome 1 open reading frame 59	-2.69461
	202981_x_at	SIAH1	seven in absentia homolog 1 (Drosophila)	-3.93427		210028_s_at	ORC3L	origin recognition complex, subunit 3-like (yeast)	-2.69758
	226377_at			-3.93573		202138_x_at	JTV1	JTV1 gene	-2.69761
	228487_s_at	RREB1	ras responsive element binding protein 1	-3.9385		218328_at	COQ4	coenzyme Q4 homolog (S. cerevisiae)	-2.70035
	224986_s_at	PDPK1	3-phosphoinositide dependent protein kinase-1	-3.94209		218301_at	RNPEPL1	arginyl aminopeptidase (aminopeptidase B)-like 1	-2.70152
	212944_at	SLC5A3	solute carrier family 5 (inositol transporters), member 3	-3.94291		235198_at	OSTM1	osteopetrosis associated transmembrane protein 1	-2.70241
	213478_at	KIAA1026	kazrin	-3.94407		242648_at	KLHL8	kelch-like 8 (Drosophila)	-2.70516
	227102_at	TRIM35	tripartite motif-containing 35	-3.94967		224743_at	IMPAD1	inositol monophosphatase domain containing 1	-2.70676
	213327_s_at	USP12	ubiquitin specific peptidase 12	-3.95694		225377_at	C9orf86	chromosome 9 open reading frame 86	-2.70807
	234983_at			-3.98889		215380_s_at	C7orf24	chromosome 7 open reading frame 24	-2.71086
	214700_x_at	RIF1	RAP1 interacting factor homolog (yeast)	-3.99527		224879_at	C9orf123	chromosome 9 open reading frame 123	-2.71328
	224813_at	WASL	Wiskott-Aldrich syndrome-like	-4.00411		202377_at			-2.71538
	212799_at	STX6	syntaxin 6	-4.00907		222538_s_at	APPL1	adaptor protein, phosphotyrosine interaction, PH domain and leucine zipper containing 1	-2.71587
	227229_at			-4.01069		215051_x_at	AIF1	allograft inflammatory factor 1	-2.71702
	1555833_a_at			-4.01745		203166_at	CFDP1	craniofacial development protein 1	-2.72623
	202392_s_at	PISD	phosphatidylserine decarboxylase	-4.02188		227665_at	MCART1	mitochondrial carrier triple repeat 1	-2.72835
	229297_at			-4.02283		212175_s_at	AK2	adenylate kinase 2	-2.73026
	218705_s_at	SNX24	sorting nexin 24	-4.04553		218391_at	SNF8	SNF8, ESCRT-II complex subunit, homolog (S. cerevisiae)	-2.73596
	235451_at	SMAD5	SMAD family member 5	-4.04609		235722_at	SYNJ2BP	synaptojanin 2 binding protein	-2.73663
	225649_s_at	STK35	serine/threonine kinase 35	-4.04788		234107_s_at	DTD1	D-tyrosyl-tRNA deacylase 1 homolog (S. cerevisiae)	-2.73842
	225407_at	MBP	myelin basic protein	-4.05422		241955_at	HECTD1	HECT domain containing 1	-2.73983
	226532_at	LZIC	leucine zipper and CTNNBIP1 domain containing	-4.06206		226844_at	MOBKL2B	MOB1, Mps One Binder kinase activator-like 2B (yeast)	-2.74433
	203749_s_at	RARA	retinoic acid receptor, alpha	-4.08024		224397_s_at	TMTC1	transmembrane and tetratricopeptide repeat containing 1	-2.74639
	204341_at	TRIM16	tripartite motif-containing 16	-4.08158		213099_at	ANGEL1	angel homolog 1 (Drosophila)	-2.74741
	227776_at			-4.08193		229635_at			-2.74851
	235625_at	VPS41	vacuolar protein sorting 41 homolog (S. cerevisiae)	-4.08424		202749_at	WRB	tryptophan rich basic protein	-2.74948
	221704_s_at	VPS37B	vacuolar protein sorting 37 homolog B (S. cerevisiae)	-4.08916		225795_at	C22orf32	chromosome 22 open reading frame 32	-2.75037
	201574_at	ETF1	eukaryotic translation termination factor 1	-4.09314		207563_s_at	OGT	O-linked N-acetylglucosamine (GlcNAc) transferase (UDP-N-acetylglucosamine:polypeptide-N-acetylglucosaminyl transferase)	-2.75211
	222518_at	ARFGEF2	ADP-ribosylation factor guanine nucleotide-exchange factor 2 (brefeldin A-inhibited)	-4.09529		222412_s_at	SSR3	signal sequence receptor, gamma (translocon-associated protein gamma)	-2.75279
	227290_at			-4.10388		235916_at	YPEL4	yippee-like 4 (Drosophila)	-2.75408
	218929_at	CDKN2AIP	CDKN2A interacting protein	-4.11847		200903_s_at	AHCY	S-adenosylhomocysteine hydrolase	-2.75449
	218987_at	ATF7IP	activating transcription factor 7 interacting protein	-4.12026		201475_x_at	MARS	methionyl-tRNA synthetase	-2.75549
	209580_s_at	MBD4	methyl-CpG binding domain protein 4	-4.12852		202258_s_at	PFAAP5	phosphonoformate immuno-associated protein 5	-2.75606
	228497_at	SLC22A15	solute carrier family 22 (organic cation transporter), member 15	-4.14041		217960_s_at	TOMM22	translocase of outer mitochondrial membrane 22 homolog (yeast)	-2.75793
	227205_at	TAF1	TAF1 RNA polymerase II, TATA box binding protein (TBP)-associated factor, 250kDa	-4.14364		202425_x_at	PPP3CA	protein phosphatase 3 (formerly 2B), catalytic subunit, alpha isoform	-2.75845
	226741_at	SLC12A6	solute carrier family 12 (potassium/chloride transporters), member 6	-4.15379		218992_at	C9orf46	chromosome 9 open reading frame 46	-2.75846
	226581_at	ZFYVE20	zinc finger, FYVE domain containing 20	-4.15416		204093_at	CCNH	cyclin H	-2.76446
	1555781_at	PQLC2	PQ loop repeat containing 2	-4.15658		201338_x_at	GTF3A	general transcription factor IIIA	-2.76816
	222633_at	TBL1XR1	transducin (beta)-like 1X-linked receptor 1	-4.16808		222687_s_at	PHCA	phytoceramidase, alkaline	-2.77282
	212116_at	TRIM27	tripartite motif-containing 27	-4.18722		209658_at	CDC16	cell division cycle 16 homolog (S. cerevisiae)	-2.77318
	226203_at			-4.18739		221759_at	G6PC3	glucose 6 phosphatase, catalytic, 3	-2.77446
	225623_at	KIAA1737	KIAA1737	-4.19615		209301_at	CA2	carbonic anhydrase II	-2.7756
	228394_at	STK10	serine/threonine kinase 10	-4.19719		218354_at	TRAPPC2L	trafficking protein particle complex 2-like	-2.77647
	201278_at	DAB2	disabled homolog 2, mitogen-responsive phosphoprotein (Drosophila)	-4.20098		204799_at	ZBED4	zinc finger, BED-type containing 4	-2.77753
	1555370_a_at	CAMTA1	calmodulin binding transcription activator 1	-4.20518		201611_s_at	ICMT	isoprenylcysteine carboxyl methyltransferase	-2.78335
	1556698_a_at	GPRIN3	GPRIN family member 3	-4.21846		226203_at			-2.78371
	227369_at	SERBP1	SERPINE1 mRNA binding protein 1	-4.22176		240173_at			-2.78932
	222763_s_at	WDR33	WD repeat domain 33	-4.24696		219242_at	CEP63	centrosomal protein 63kDa	-2.79808
	228299_at	KCTD20	potassium channel tetramerisation domain containing 20	-4.24827		229235_at	NFATC2IP	nuclear factor of activated T-cells, cytoplasmic, calcineurin-dependent 2 interacting protein	-2.79843
	225313_at	C20orf177	chromosome 20 open reading frame 177	-4.25494		210385_s_at	ARTS-1	type 1 tumor necrosis factor receptor shedding aminopeptidase regulator	-2.80149
	202887_s_at	DDIT4	DNA-damage-inducible transcript 4	-4.26266		208931_s_at	ILF3	interleukin enhancer binding factor 3, 90kDa	-2.80293
	212500_at	C10orf22	chromosome 10 open reading frame 22	-4.26427		212054_x_at	TBC1D9B	TBC1 domain family, member 9B (with GRAM domain)	-2.80919
	229699_at			-4.26585		219968_at	ZNF589	zinc finger protein 589	-2.81147
	226348_at			-4.26608		224666_at	NSMCE1	non-SMC element 1 homolog (S. cerevisiae)	-2.8192
	225376_at	C20orf11	chromosome 20 open reading frame 11	-4.27946		201037_at	PFKP	phosphofructokinase, platelet	-2.82353
	223000_s_at	F11R	F11 receptor	-4.28341		202592_at	BLOC1S1	biogenesis of lysosome-related organelles complex-1, subunit 1	-2.82924
	225434_at	DEDD2	death effector domain containing 2	-4.29617		212350_at	TBC1D1	TBC1 (tre-2/USP6, BUB2, cdc16) domain family, member 1	-2.83261
	225136_at	PLEKHA2	pleckstrin homology domain containing, family A (phosphoinositide binding specific) member 2	-4.30697		225661_at	IFNAR1	interferon (alpha, beta and omega) receptor 1	-2.83968
	224738_x_at	RPL7L1	ribosomal protein L7-like 1	-4.30748		209207_s_at	SEC22B	SEC22 vesicle trafficking protein homolog B (S. cerevisiae)	-2.84342
	223228_at	LDOC1L	leucine zipper, down-regulated in cancer 1-like	-4.31117		37943_at	ZFYVE26	zinc finger, FYVE domain containing 26	-2.85066
	228184_at	DISP1	dispatched homolog 1 (Drosophila)	-4.32425		226796_at	LOC116236	hypothetical protein LOC116236	-2.85142
	218098_at			-4.33439		226723_at	CCDC23	coiled-coil domain containing 23	-2.85178
	229428_at	PARG	poly (ADP-ribose) glycohydrolase	-4.33521		201563_at	SORD	sorbitol dehydrogenase	-2.85566
	225364_at	STK4	serine/threonine kinase 4	-4.33587		221006_s_at	SNX27	sorting nexin family member 27	-2.86009
	205538_at	CORO2A	coronin, actin binding protein, 2A	-4.34507		212464_s_at	FN1	fibronectin 1	-2.86115
	227049_at	ZADH2	zinc binding alcohol dehydrogenase, domain containing 2	-4.35537		209025_s_at	SYNCRIP	synaptotagmin binding, cytoplasmic RNA interacting protein	-2.8663
	235360_at			-4.36127		212871_at	MAPKAPK5	mitogen-activated protein kinase-activated protein kinase 5	-2.86923
	201739_at	SGK	serum/glucocorticoid regulated kinase	-4.36721		219217_at	NARS2	asparaginyl-tRNA synthetase 2, mitochondrial (putative)	-2.87078
	228762_at	LFNG	LFNG O-fucosylpeptide 3-beta-N-acetylglucosaminyltransferase	-4.38352		214501_s_at	H2AFY	H2A histone family, member Y	-2.87312
	227782_at	ZBTB7C	zinc finger and BTB domain containing 7C	-4.39115		226017_at	CMTM7	CKLF-like MARVEL transmembrane domain containing 7	-2.87814
	225430_at	15E1.2	hypothetical protein LOC283459	-4.44131		218327_s_at	SNAP29	synaptosomal-associated protein, 29kDa	-2.88057
	226251_at	ASXL2	additional sex combs like 2 (Drosophila)	-4.44509		202528_at	GALE	UDP-galactose-4-epimerase	-2.88317
	224952_at	TANC2	tetratricopeptide repeat, ankyrin repeat and coiled-coil containing 2	-4.45346		202427_s_at	BRP44	brain protein 44	-2.88372
	43511_s_at			-4.45709		1569129_s_at			-2.88964
	203066_at	GALNAC4S-6ST	B cell RAG associated protein	-4.46016		219020_at	HS1BP3	HCLS1 binding protein 3	-2.89236
	213119_at	SLC36A1	solute carrier family 36 (proton/amino acid symporter), member 1	-4.46533		211423_s_at	SC5DL	sterol-C5-desaturase (ERG3 delta-5-desaturase homolog, S. cerevisiae)-like	-2.89341
	203100_s_at	CDYL	chromodomain protein, Y-like	-4.46873		213836_s_at	WIPI1	WD repeat domain, phosphoinositide interacting 1	-2.89578
	227150_at	MTF1	metal-regulatory transcription factor 1	-4.47418		208914_at	GGA2	golgi associated, gamma adaptin ear containing, ARF binding protein 2	-2.89646
	204435_at	NUPL1	nucleoporin like 1	-4.47818		202017_at	EPHX1	epoxide hydrolase 1, microsomal (xenobiotic)	-2.90283
	243463_s_at	RIT1	Ras-like without CAAX 1	-4.48044		204608_at	ASL	argininosuccinate lyase	-2.90291
	225755_at	KLHDC8B	kelch domain containing 8B	-4.48431		200992_at	IPO7	importin 7	-2.90716
	212237_at	ASXL1	additional sex combs like 1 (Drosophila)	-4.49114		225489_at	TMEM18	transmembrane protein 18	-2.9083
	224928_at	SETD7	SET domain containing (lysine methyltransferase) 7	-4.49658		212627_s_at	EXOSC7	exosome component 7	-2.90942
	225725_at			-4.50346		214061_at	WDR67	WD repeat domain 67	-2.90969
	231870_s_at	NMD3	NMD3 homolog (S. cerevisiae)	-4.5074		215090_x_at	LOC440434	hypothetical protein FLJ11822	-2.91139
	201566_x_at	ID2	inhibitor of DNA binding 2, dominant negative helix-loop-helix protein	-4.51139		214449_s_at	RHOQ	ras homolog gene family, member Q	-2.91678
	212919_at	DCP2	DCP2 decapping enzyme homolog (S. cerevisiae)	-4.51341		224448_s_at	C6orf125	chromosome 6 open reading frame 125	-2.91718
	225116_at	HIPK2	homeodomain interacting protein kinase 2	-4.52027		221081_s_at	DENND2D	DENN/MADD domain containing 2D	-2.91987
	226886_at			-4.52062		228334_x_at	KIAA1712	KIAA1712	-2.92179
	225917_at			-4.52945		227776_at			-2.92632
	204593_s_at	SMCR7L	Smith-Magenis syndrome chromosome region, candidate 7-like	-4.54344		224695_at	C2orf29	chromosome 2 open reading frame 29	-2.92906
	226542_at			-4.55255		225359_at	DNAJC19	DnaJ (Hsp40) homolog, subfamily C, member 19	-2.93213
	227073_at	MAP3K2	mitogen-activated protein kinase kinase kinase 2	-4.5538		202944_at	NAGA	N-acetylgalactosaminidase, alpha-	-2.94168
	226652_at	USP3	ubiquitin specific peptidase 3	-4.55923		203122_at	TTC15	tetratricopeptide repeat domain 15	-2.94451
	213268_at	CAMTA1	calmodulin binding transcription activator 1	-4.56183		221895_at	MOSPD2	motile sperm domain containing 2	-2.94534
	227280_s_at	CCNYL1	cyclin Y-like 1	-4.5662		206363_at	MAF	v-maf musculoaponeurotic fibrosarcoma oncogene homolog (avian)	-2.94731
	203250_at	RBM16	RNA binding motif protein 16	-4.56986		218396_at	VPS13C	vacuolar protein sorting 13 homolog C (S. cerevisiae)	-2.94981
	214755_at	UAP1L1	UDP-N-acteylglucosamine pyrophosphorylase 1-like 1	-4.57426		207467_x_at	CAST	calpastatin	-2.95483
	1552846_s_at	RAB42	RAB42, member RAS oncogene family	-4.58475		202710_at	BET1	BET1 homolog (S. cerevisiae)	-2.9571
	226711_at	FOXN2	forkhead box N2	-4.59213		227446_s_at	C14orf167	chromosome 14 open reading frame 167	-2.95794
	224611_s_at	DNAJC5	DnaJ (Hsp40) homolog, subfamily C, member 5	-4.59553		244052_at	CBR4	carbonyl reductase 4	-2.96004
	218229_s_at	POGK	pogo transposable element with KRAB domain	-4.62351		201432_at	CAT	catalase	-2.96012
	202683_s_at	RNMT	RNA (guanine-7-) methyltransferase	-4.62626		201729_s_at	KIAA0100	KIAA0100	-2.96426
	235889_at			-4.62662		209166_s_at	MAN2B1	mannosidase, alpha, class 2B, member 1	-2.96699
	226011_at	CCDC12	coiled-coil domain containing 12	-4.6269		222116_s_at	TBC1D16	TBC1 domain family, member 16	-2.96767
	225853_at	GNPNAT1	glucosamine-phosphate N-acetyltransferase 1	-4.65193		218211_s_at	MLPH	melanophilin	-2.97638
	205249_at	EGR2	early growth response 2 (Krox-20 homolog, Drosophila)	-4.65673		209084_s_at	RFC1	replication factor C (activator 1) 1, 145kDa	-2.97821
	202519_at	MLXIP	MLX interacting protein	-4.66988		225362_at	FAM122B	family with sequence similarity 122B	-2.97978
	227897_at	RAP2B	RAP2B, member of RAS oncogene family	-4.68586		202305_s_at	FEZ2	fasciculation and elongation protein zeta 2 (zygin II)	-2.99246
	226267_at	JDP2	jun dimerization protein 2	-4.68879		202813_at	TARBP1	TAR (HIV-1) RNA binding protein 1	-2.9929
	227274_at			-4.70168		224619_at	CASC4	cancer susceptibility candidate 4	-2.99331
	212993_at			-4.72065		1553043_a_at	CD300LF	CD300 molecule-like family member f	-2.99336
	203123_s_at	SLC11A2	solute carrier family 11 (proton-coupled divalent metal ion transporters), member 2	-4.73326		203970_s_at	PEX3	peroxisomal biogenesis factor 3	-2.99352
	225539_at	ZNF295	zinc finger protein 295	-4.73451		218168_s_at	CABC1	chaperone, ABC1 activity of bc1 complex homolog (S. pombe)	-2.99608
	213750_at	RSL1D1	ribosomal L1 domain containing 1	-4.73745		211033_s_at	PEX7	peroxisomal biogenesis factor 7	-2.99712
	203185_at	RASSF2	Ras association (RalGDS/AF-6) domain family 2	-4.75801		208309_s_at	MALT1	mucosa associated lymphoid tissue lymphoma translocation gene 1	-2.99786
	223185_s_at	BHLHB3	basic helix-loop-helix domain containing, class B, 3	-4.76261		218253_s_at	LGTN	ligatin	-2.99936
	1552691_at	ARL11	ADP-ribosylation factor-like 11	-4.76508		235093_at			-3.00593
	223249_at	CLDN12	claudin 12	-4.76542		217106_x_at	DIMT1L	DIM1 dimethyladenosine transferase 1-like (S. cerevisiae)	-3.00625
	227112_at	TMCC1	transmembrane and coiled-coil domain family 1	-4.77013		218080_x_at	FAF1	Fas (TNFRSF6) associated factor 1	-3.01024
	232504_at	LOC285628	hypothetical protein LOC285628	-4.7848		203706_s_at	FZD7	frizzled homolog 7 (Drosophila)	-3.01215
	214722_at	NOTCH2NL	Notch homolog 2 (Drosophila) N-terminal like	-4.81401		209581_at	HRASLS3	HRAS-like suppressor 3	-3.02127
	227184_at			-4.83289		229236_s_at	SFXN4	sideroflexin 4	-3.02614
	228992_at	MED28	mediator complex subunit 28	-4.89533		205786_s_at	ITGAM	integrin, alpha M (complement component 3 receptor 3 subunit)	-3.02635
	218708_at	NXT1	NTF2-like export factor 1	-4.89631		219649_at	ALG6	asparagine-linked glycosylation 6 homolog (S. cerevisiae, alpha-1,3-glucosyltransferase)	-3.02695
	225286_at	ARSD	arylsulfatase D	-4.9053		218549_s_at	FAM82B	family with sequence similarity 82, member B	-3.03022
	221840_at	PTPRE	protein tyrosine phosphatase, receptor type, E	-4.90788		202426_s_at	RXRA	retinoid X receptor, alpha	-3.03117
	227199_at	DIP2A	DIP2 disco-interacting protein 2 homolog A (Drosophila)	-4.94051		212509_s_at	MXRA7	matrix-remodelling associated 7	-3.03638
	244261_at	IL28RA	interleukin 28 receptor, alpha (interferon, lambda receptor)	-4.95703		222388_s_at	VPS35	vacuolar protein sorting 35 homolog (S. cerevisiae)	-3.03662
	235215_at			-4.9739		222503_s_at	WDR41	WD repeat domain 41	-3.04029
	212115_at	HN1L	hematological and neurological expressed 1-like	-4.97397		225006_x_at	TH1L	TH1-like (Drosophila)	-3.04068
	212615_at	CHD9	chromodomain helicase DNA binding protein 9	-4.98126		224821_at	ABHD14B	abhydrolase domain containing 14B	-3.04289
	205590_at	RASGRP1	RAS guanyl releasing protein 1 (calcium and DAG-regulated)	-4.99236		213039_at	ARHGEF18	rho/rac guanine nucleotide exchange factor (GEF) 18	-3.04378
	212017_at	LOC130074	p20	-5.00011		208802_at	SRP72	signal recognition particle 72kDa	-3.04885
	202916_s_at	FAM20B	family with sequence similarity 20, member B	-5.02234		215772_x_at	SUCLG2	succinate-CoA ligase, GDP-forming, beta subunit	-3.05402
	218613_at	PSD3	pleckstrin and Sec7 domain containing 3	-5.02648		201157_s_at	NMT1	N-myristoyltransferase 1	-3.05955
	227415_at	DGKH	diacylglycerol kinase, eta	-5.0357		225673_at	MYADM	myeloid-associated differentiation marker	-3.06127
	225285_at	BCAT1	branched chain aminotransferase 1, cytosolic	-5.04922		214264_s_at	C14orf143	chromosome 14 open reading frame 143	-3.06231
	214467_at	GPR65	G protein-coupled receptor 65	-5.07475		212396_s_at	KIAA0090	KIAA0090	-3.06648
	223474_at	C14orf4	chromosome 14 open reading frame 4	-5.10791		1554627_a_at	ASCC1	activating signal cointegrator 1 complex subunit 1	-3.06854
	221565_s_at	FAM26B	family with sequence similarity 26, member B	-5.12767		228456_s_at	LOC149832	hypothetical protein LOC149832	-3.07153
	205042_at	GNE	glucosamine (UDP-N-acetyl)-2-epimerase/N-acetylmannosamine kinase	-5.1327		218287_s_at	EIF2C1	eukaryotic translation initiation factor 2C, 1	-3.07203
	227109_at	CYP2R1	cytochrome P450, family 2, subfamily R, polypeptide 1	-5.15769		221767_x_at	HDLBP	high density lipoprotein binding protein (vigilin)	-3.07694
	204669_s_at	RNF24	ring finger protein 24	-5.16846		209998_at	PIGO	phosphatidylinositol glycan anchor biosynthesis, class O	-3.07785
	212611_at	DTX4	deltex 4 homolog (Drosophila)	-5.17145		1555736_a_at	AGTRAP	angiotensin II receptor-associated protein	-3.08063
	50221_at	TFEB	transcription factor EB	-5.1847		201521_s_at	NCBP2	nuclear cap binding protein subunit 2, 20kDa	-3.08719
	225232_at	MTMR12	myotubularin related protein 12	-5.19899		217757_at	A2M	alpha-2-macroglobulin	-3.0929
	223159_s_at	NEK6	NIMA (never in mitosis gene a)-related kinase 6	-5.21712		200665_s_at	SPARC	secreted protein, acidic, cysteine-rich (osteonectin)	-3.09516
	219344_at	SLC29A3	solute carrier family 29 (nucleoside transporters), member 3	-5.26685		218024_at	BRP44L	brain protein 44-like	-3.09895
	229810_at			-5.30026		224566_at	TncRNA	trophoblast-derived noncoding RNA	-3.10257
	226720_at	MST101	MSTP101	-5.30289		221494_x_at	EIF3K	eukaryotic translation initiation factor 3, subunit K	-3.10358
	224939_at			-5.31871		202677_at	RASA1	RAS p21 protein activator (GTPase activating protein) 1	-3.10434
	227586_at	TMEM170	transmembrane protein 170	-5.33075		211755_s_at	ATP5F1	ATP synthase, H+ transporting, mitochondrial F0 complex, subunit B1	-3.10456
	40255_at	DDX28	DEAD (Asp-Glu-Ala-Asp) box polypeptide 28	-5.3361		225718_at	KIAA1715	KIAA1715	-3.11812
	217922_at			-5.33685		226264_at	SUSD1	sushi domain containing 1	-3.1205
	209048_s_at	ZMYND8	zinc finger, MYND-type containing 8	-5.34039		219960_s_at	UCHL5	ubiquitin carboxyl-terminal hydrolase L5	-3.12192
	212702_s_at	BICD2	bicaudal D homolog 2 (Drosophila)	-5.34066		225503_at	DHRSX	dehydrogenase/reductase (SDR family) X-linked	-3.12475
	218019_s_at	PDXK	pyridoxal (pyridoxine, vitamin B6) kinase	-5.38167		218017_s_at	HGSNAT	heparan-alpha-glucosaminide N-acetyltransferase	-3.12563
	229968_at	TLR1	toll-like receptor 1	-5.39337		203683_s_at	VEGFB	vascular endothelial growth factor B	-3.12885
	225868_at	TRIM47	tripartite motif-containing 47	-5.40101		223266_at	ALS2CR2	amyotrophic lateral sclerosis 2 (juvenile) chromosome region, candidate 2	-3.13325
	203723_at	ITPKB	inositol 1,4,5-trisphosphate 3-kinase B	-5.41793		227274_at			-3.13363
	228073_at	NANP	N-acetylneuraminic acid phosphatase	-5.43399		226879_at	HVCN1	hydrogen voltage-gated channel 1	-3.13777
	204346_s_at	RASSF1	Ras association (RalGDS/AF-6) domain family 1	-5.44645		218853_s_at	MOSPD1	motile sperm domain containing 1	-3.14211
	235121_at	ZNF542	zinc finger protein 542	-5.53465		226985_at	FGD5	FYVE, RhoGEF and PH domain containing 5	-3.14296
	205020_s_at	ARL4A	ADP-ribosylation factor-like 4A	-5.53713		228805_at	C5orf25	chromosome 5 open reading frame 25	-3.14383
	226865_at			-5.57168		225651_at	UBE2E2	ubiquitin-conjugating enzyme E2E 2 (UBC4/5 homolog, yeast)	-3.14389
	202241_at	TRIB1	tribbles homolog 1 (Drosophila)	-5.57748		230179_at	LOC285812	hypothetical protein LOC285812	-3.14675
	211661_x_at	PTAFR	platelet-activating factor receptor	-5.59511		213853_at	DPH4	DPH4, JJJ3 homolog (S. cerevisiae)	-3.1505
	227665_at	MCART1	mitochondrial carrier triple repeat 1	-5.59759		200785_s_at	LRP1	low density lipoprotein-related protein 1 (alpha-2-macroglobulin receptor)	-3.15518
	227116_at			-5.70065		218184_at	TULP4	tubby like protein 4	-3.16
	225661_at	IFNAR1	interferon (alpha, beta and omega) receptor 1	-5.74214		205726_at	DIAPH2	diaphanous homolog 2 (Drosophila)	-3.16075
	203940_s_at	VASH1	vasohibin 1	-5.74592		201930_at	MCM6	minichromosome maintenance complex component 6	-3.16148
	238756_at	MTPN	myotrophin	-5.77668		220547_s_at	FAM35A	family with sequence similarity 35, member A	-3.16288
	229394_s_at	GRLF1	glucocorticoid receptor DNA binding factor 1	-5.7916		201092_at	RBBP7	retinoblastoma binding protein 7	-3.16498
	222889_at	DCLRE1B	DNA cross-link repair 1B (PSO2 homolog, S. cerevisiae)	-5.79593		208796_s_at	CCNG1	cyclin G1	-3.1663
	223441_at	SLC17A5	solute carrier family 17 (anion/sugar transporter), member 5	-5.84527		219375_at	CEPT1	choline/ethanolamine phosphotransferase 1	-3.17211
	226832_at	RNF168	ring finger protein 168	-5.85541		209721_s_at	HOM-TES-103	hypothetical protein LOC25900	-3.17577
	219256_s_at	SH3TC1	SH3 domain and tetratricopeptide repeats 1	-5.86216		227586_at	TMEM170	transmembrane protein 170	-3.17651
	217122_s_at	LOC728661	similar to solute carrier family 35, member E2	-5.8808		225317_at	ACBD6	acyl-Coenzyme A binding domain containing 6	-3.19137
	227002_at	FAM78A	family with sequence similarity 78, member A	-5.88967		218481_at	EXOSC5	exosome component 5	-3.19508
	225256_at			-5.92828		214170_x_at	FH	fumarate hydratase	-3.19562
	219968_at	ZNF589	zinc finger protein 589	-5.92853		223177_at	NT5DC1	5'-nucleotidase domain containing 1	-3.1962
	226793_at	LOC283267	hypothetical protein LOC283267	-5.93082		208899_x_at	ATP6V1D	ATPase, H+ transporting, lysosomal 34kDa, V1 subunit D	-3.19779
	212964_at	HIC2	hypermethylated in cancer 2	-5.93641		224968_at	CCDC104	coiled-coil domain containing 104	-3.19852
	224959_at	SLC26A2	solute carrier family 26 (sulfate transporter), member 2	-5.95068		226727_at	CISD3	CDGSH iron sulfur domain 3	-3.1991
	202849_x_at	GRK6	G protein-coupled receptor kinase 6	-5.95347		212615_at	CHD9	chromodomain helicase DNA binding protein 9	-3.19956
	231968_at			-6.02468		202283_at	SERPINF1	serpin peptidase inhibitor, clade F (alpha-2 antiplasmin, pigment epithelium derived factor), member 1	-3.19987
	205251_at	PER2	period homolog 2 (Drosophila)	-6.03319		208074_s_at	AP2S1	adaptor-related protein complex 2, sigma 1 subunit	-3.20473
	227080_at	ZNF697	zinc finger protein 697	-6.08532		228963_at			-3.20531
	225609_at	GSR	glutathione reductase	-6.08591		200789_at	ECH1	enoyl Coenzyme A hydratase 1, peroxisomal	-3.22131
	1556588_at	C15orf37	chromosome 15 open reading frame 37	-6.0879		219622_at	RAB20	RAB20, member RAS oncogene family	-3.22749
	221538_s_at	PLXNA1	plexin A1	-6.1042		221495_s_at	TCF25	transcription factor 25 (basic helix-loop-helix)	-3.23256
	209307_at	SWAP70	SWAP-70 protein	-6.11255		203040_s_at	HMBS	hydroxymethylbilane synthase	-3.2356
	213355_at	ST3GAL6	ST3 beta-galactoside alpha-2,3-sialyltransferase 6	-6.11573		226797_at	NME1	non-metastatic cells 1, protein (NM23A) expressed in	-3.23757
	226336_at	PPIA	peptidylprolyl isomerase A (cyclophilin A)	-6.17515		202929_s_at	DDT	D-dopachrome tautomerase	-3.23827
	217678_at	SLC7A11	solute carrier family 7, (cationic amino acid transporter, y+ system) member 11	-6.29085		226747_at	TXNDC16	thioredoxin domain containing 16	-3.23876
	228918_at	SLC43A2	solute carrier family 43, member 2	-6.35591		201589_at	SMC1A	structural maintenance of chromosomes 1A	-3.24661
	204039_at	CEBPA	CCAAT/enhancer binding protein (C/EBP), alpha	-6.38987		218291_at	MAPBPIP	mitogen-activated protein-binding protein-interacting protein	-3.24812
	224835_at	RP5-1022P6.2	hypothetical protein KIAA1434	-6.39849		225740_x_at	MDM4	Mdm4, transformed 3T3 cell double minute 4, p53 binding protein (mouse)	-3.25015
	228167_at	KLHL6	kelch-like 6 (Drosophila)	-6.42973		227001_at	NPAL2	NIPA-like domain containing 2	-3.25276
	227995_at			-6.45045		223133_at	TMEM14B	transmembrane protein 14B	-3.25396
	231972_at	TBC1D7	TBC1 domain family, member 7	-6.45511		204220_at	GMFG	glia maturation factor, gamma	-3.25502
	235647_at	AP4S1	adaptor-related protein complex 4, sigma 1 subunit	-6.47938		212192_at	KCTD12	potassium channel tetramerisation domain containing 12	-3.25808
	213052_at	PRKAR2A	protein kinase, cAMP-dependent, regulatory, type II, alpha	-6.49511		208923_at	CYFIP1	cytoplasmic FMR1 interacting protein 1	-3.26569
	225545_at	EEF2K	eukaryotic elongation factor-2 kinase	-6.50309		223162_s_at	KIAA1147	KIAA1147	-3.26646
	203665_at	HMOX1	heme oxygenase (decycling) 1	-6.54337		214728_x_at	SMARCA4	SWI/SNF related, matrix associated, actin dependent regulator of chromatin, subfamily a, member 4	-3.26925
	203887_s_at	THBD	thrombomodulin	-6.55209		219693_at	AGPAT4	1-acylglycerol-3-phosphate O-acyltransferase 4 (lysophosphatidic acid acyltransferase, delta)	-3.26979
	231925_at	P2RY1	purinergic receptor P2Y, G-protein coupled, 1	-6.61484		226171_at	ZDHHC3	zinc finger, DHHC-type containing 3	-3.27025
	212248_at	MTDH	metadherin	-6.72119		221078_s_at	CCDC88A	coiled-coil domain containing 88A	-3.27593
	235142_at	ZBTB8	zinc finger and BTB domain containing 8	-6.79106		226923_at	SCFD2	sec1 family domain containing 2	-3.28137
	226254_s_at	KIAA1430	KIAA1430	-6.83125		225000_at	PRKAR2A	protein kinase, cAMP-dependent, regulatory, type II, alpha	-3.28236
	225522_at	AAK1	AP2 associated kinase 1	-6.84163		204957_at	ORC5L	origin recognition complex, subunit 5-like (yeast)	-3.28374
	226364_at	HIP1	huntingtin interacting protein 1	-7.02914		226741_at	SLC12A6	solute carrier family 12 (potassium/chloride transporters), member 6	-3.28505
	224811_at			-7.08146		43977_at	TMEM161A	transmembrane protein 161A	-3.29916
	218507_at	HIG2	hypoxia-inducible protein 2	-7.10049		226437_at	YIF1B	Yip1 interacting factor homolog B (S. cerevisiae)	-3.30265
	225904_at	C1orf96	chromosome 1 open reading frame 96	-7.1107		232149_s_at	NSMAF	neutral sphingomyelinase (N-SMase) activation associated factor	-3.30277
	225231_at	CBL	Cas-Br-M (murine) ecotropic retroviral transforming sequence	-7.19994		212516_at	CENTD2	centaurin, delta 2	-3.3054
	217100_s_at	UBXD7	UBX domain containing 7	-7.20011		226607_at	C20orf194	chromosome 20 open reading frame 194	-3.3109
	1559584_a_at	C16orf54	chromosome 16 open reading frame 54	-7.20925		226068_at	SYK	spleen tyrosine kinase	-3.31145
	212230_at	PPAP2B	phosphatidic acid phosphatase type 2B	-7.22469		208647_at	FDFT1	farnesyl-diphosphate farnesyltransferase 1	-3.31486
	226215_s_at	FBXL10	F-box and leucine-rich repeat protein 10	-7.2744		218259_at	MKL2	MKL/myocardin-like 2	-3.3161
	226739_at	RNF169	ring finger protein 169	-7.27878		218709_s_at	IFT52	intraflagellar transport 52 homolog (Chlamydomonas)	-3.32486
	218031_s_at	FOXN3	forkhead box N3	-7.3184		227063_at	C17orf61	chromosome 17 open reading frame 61	-3.32647
	208914_at	GGA2	golgi associated, gamma adaptin ear containing, ARF binding protein 2	-7.4633		225928_at	VTI1B	vesicle transport through interaction with t-SNAREs homolog 1B (yeast)	-3.32712
	235093_at			-7.47231		203218_at	MAPK9	mitogen-activated protein kinase 9	-3.32724
	223553_s_at	DOK3	docking protein 3	-7.51885		227930_at	EIF2C4	eukaryotic translation initiation factor 2C, 4	-3.33437
	229410_at	PAEP	progestagen-associated endometrial protein (placental protein 14, pregnancy-associated endometrial alpha-2-globulin, alpha uterine protein)	-7.59415		220741_s_at	PPA2	pyrophosphatase (inorganic) 2	-3.33575
	219289_at	HEATR3	HEAT repeat containing 3	-7.63894		209932_s_at	DUT	dUTP pyrophosphatase	-3.34289
	1554345_a_at	GIN1	gypsy retrotransposon integrase 1	-7.64666		203922_s_at	CYBB	cytochrome b-245, beta polypeptide (chronic granulomatous disease)	-3.34384
	239377_at	MGC11102	hypothetical protein MGC11102	-7.69153		214658_at	TICAM2	toll-like receptor adaptor molecule 2	-3.34385
	212124_at	ZMIZ1	zinc finger, MIZ-type containing 1	-7.70012		205888_s_at	JAKMIP2	janus kinase and microtubule interacting protein 2	-3.34448
	225107_at	HNRNPA2B1	heterogeneous nuclear ribonucleoprotein A2/B1	-7.9238		202275_at	G6PD	glucose-6-phosphate dehydrogenase	-3.34682
	236769_at	LOC158402	hypothetical protein LOC158402	-7.95986		212707_s_at	RASA4	RAS p21 protein activator 4	-3.35575
	226883_at			-8.00639		227268_at	LOC51136	PTD016 protein	-3.35889
	209567_at	RRS1	RRS1 ribosome biogenesis regulator homolog (S. cerevisiae)	-8.01232		204279_at	PSMB9	proteasome (prosome, macropain) subunit, beta type, 9 (large multifunctional peptidase 2)	-3.35909
	242871_at	PAQR5	progestin and adipoQ receptor family member V	-8.02204		213294_at			-3.35957
	1566766_a_at			-8.04905		203148_s_at	TRIM14	tripartite motif-containing 14	-3.36087
	222996_s_at	CXXC5	CXXC finger 5	-8.16501		218179_s_at	FLJ12716	FLJ12716 protein	-3.3618
	227696_at	EXOSC6	exosome component 6	-8.24684		203633_at	CPT1A	carnitine palmitoyltransferase 1A (liver)	-3.36307
	225127_at	TMEM181	transmembrane protein 181	-8.27556		204546_at	KIAA0513	KIAA0513	-3.36387
	218259_at	MKL2	MKL/myocardin-like 2	-8.36579		210027_s_at	APEX1	APEX nuclease (multifunctional DNA repair enzyme) 1	-3.36402
	227420_at	TNFAIP8L1	tumor necrosis factor, alpha-induced protein 8-like 1	-8.37628		217823_s_at	UBE2J1	ubiquitin-conjugating enzyme E2, J1 (UBC6 homolog, yeast)	-3.36472
	225740_x_at	MDM4	Mdm4, transformed 3T3 cell double minute 4, p53 binding protein (mouse)	-8.43517		226894_at	SLC35A3	solute carrier family 35 (UDP-N-acetylglucosamine (UDP-GlcNAc) transporter), member A3	-3.36486
	226249_at	SNX30	sorting nexin family member 30	-8.44215		212145_at	MRPS27	mitochondrial ribosomal protein S27	-3.36612
	228710_at			-8.5513		230011_at	RP5-821D11.2	meiosis defective 1	-3.3666
	221571_at	TRAF3	TNF receptor-associated factor 3	-8.58318		221478_at	BNIP3L	BCL2/adenovirus E1B 19kDa interacting protein 3-like	-3.3671
	212441_at	KIAA0232	KIAA0232	-8.68969		210131_x_at	SDHC	succinate dehydrogenase complex, subunit C, integral membrane protein, 15kDa	-3.36819
	231928_at	HES2	hairy and enhancer of split 2 (Drosophila)	-8.82199		217761_at	ADI1	acireductone dioxygenase 1	-3.36908
	226381_at	PS1TP4	HBV preS1-transactivated protein 4	-9.01112		223591_at	RNF135	ring finger protein 135	-3.36953
	228841_at	LYRM7	Lyrm7 homolog (mouse)	-9.1479		210786_s_at	FLI1	Friend leukemia virus integration 1	-3.36953
	202968_s_at	DYRK2	dual-specificity tyrosine-(Y)-phosphorylation regulated kinase 2	-9.23121		208717_at	OXA1L	oxidase (cytochrome c) assembly 1-like	-3.37054
	226347_at			-9.2747		209360_s_at	RUNX1	runt-related transcription factor 1 (acute myeloid leukemia 1; aml1 oncogene)	-3.3731
	207907_at	TNFSF14	tumor necrosis factor (ligand) superfamily, member 14	-9.42829		218281_at	MRPL48	mitochondrial ribosomal protein L48	-3.37342
	225780_at	RSC1A1	regulatory solute carrier protein, family 1, member 1	-9.46232		204169_at	IMPDH1	IMP (inosine monophosphate) dehydrogenase 1	-3.39515
	225225_at	KRTAP4-7	keratin associated protein 4-7	-9.73333		225530_at	MOBKL2A	MOB1, Mps One Binder kinase activator-like 2A (yeast)	-3.39556
	226395_at	LOC286170	hypothetical protein LOC286170	-9.74063		225624_at	LOC92017	similar to RIKEN cDNA 4933437K13	-3.39611
	226744_at	METT10D	methyltransferase 10 domain containing	-9.77398		219073_s_at	OSBPL10	oxysterol binding protein-like 10	-3.39935
	212710_at	CAMSAP1	calmodulin regulated spectrin-associated protein 1	-9.78509		226025_at	ANKRD28	ankyrin repeat domain 28	-3.40154
	225731_at	ANKRD50	ankyrin repeat domain 50	-9.80306		219648_at	MREG	melanoregulin	-3.41365
	232181_at	LOC153346	hypothetical protein LOC153346	-9.83308		215813_s_at	PTGS1	prostaglandin-endoperoxide synthase 1 (prostaglandin G/H synthase and cyclooxygenase)	-3.41412
	228479_at			-9.83675		231925_at	P2RY1	purinergic receptor P2Y, G-protein coupled, 1	-3.41716
	201490_s_at	PPIF	peptidylprolyl isomerase F (cyclophilin F)	-9.86173		218163_at	MCTS1	malignant T cell amplified sequence 1	-3.42017
	227144_at	C22orf9	chromosome 22 open reading frame 9	-10.3954		235474_at			-3.4223
	225199_at	C16orf72	chromosome 16 open reading frame 72	-10.43		204236_at	FLI1	Friend leukemia virus integration 1	-3.42315
	217998_at	PHLDA1	pleckstrin homology-like domain, family A, member 1	-10.5121		228559_at	CENPN	centromere protein N	-3.42491
	218145_at	TRIB3	tribbles homolog 3 (Drosophila)	-10.9431		202009_at	TWF2	twinfilin, actin-binding protein, homolog 2 (Drosophila)	-3.42493
	201416_at	SOX4	SRY (sex determining region Y)-box 4	-10.9436		227085_at	H2AFV	H2A histone family, member V	-3.42744
	213817_at			-11.9503		60471_at	RIN3	Ras and Rab interactor 3	-3.42752
	224793_s_at	TGFBR1	transforming growth factor, beta receptor I (activin A receptor type II-like kinase, 53kDa)	-12.1124		224622_at	TBC1D14	TBC1 domain family, member 14	-3.42873
	233116_at			-12.556		212169_at	FKBP9	FK506 binding protein 9, 63 kDa	-3.43141
	203702_s_at	TTLL4	tubulin tyrosine ligase-like family, member 4	-12.5776		218424_s_at	STEAP3	STEAP family member 3	-3.43611
	1559067_a_at			-12.7757		208510_s_at	PPARG	peroxisome proliferator-activated receptor gamma	-3.4388
	221753_at	SSH1	slingshot homolog 1 (Drosophila)	-12.9837		218243_at	RUFY1	RUN and FYVE domain containing 1	-3.43967
	227647_at	KCNE3	potassium voltage-gated channel, Isk-related family, member 3	-13.6674		226274_at	CLCN5	chloride channel 5 (nephrolithiasis 2, X-linked, Dent disease)	-3.44099
	225858_s_at	BIRC4	baculoviral IAP repeat-containing 4	-13.9571		213133_s_at	GCSH	glycine cleavage system protein H (aminomethyl carrier)	-3.44612
	227970_at	GPR157	G protein-coupled receptor 157	-13.9823		236297_at			-3.44845
	204206_at	MNT	MAX binding protein	-14.0478		225499_at			-3.44892
	202971_s_at	DYRK2	dual-specificity tyrosine-(Y)-phosphorylation regulated kinase 2	-14.1521		218488_at	EIF2B3	eukaryotic translation initiation factor 2B, subunit 3 gamma, 58kDa	-3.45061
	1553979_at			-14.6089		211661_x_at	PTAFR	platelet-activating factor receptor	-3.45097
	225338_at	ZYG11B	zyg-11 homolog B (C. elegans)	-14.8121		224576_at	ERGIC1	endoplasmic reticulum-golgi intermediate compartment (ERGIC) 1	-3.45999
	232130_at	SNX12	sorting nexin 12	-15.4129		220985_s_at	RNF170	ring finger protein 170	-3.4645
	202969_at			-15.6611		203430_at	HEBP2	heme binding protein 2	-3.46534
	226116_at			-16.017		202471_s_at	IDH3G	isocitrate dehydrogenase 3 (NAD+) gamma	-3.4696
	232151_at			-18.8512		223405_at	NPL	N-acetylneuraminate pyruvate lyase (dihydrodipicolinate synthase)	-3.47164
	219878_s_at	KLF13	Kruppel-like factor 13	-18.9465		222714_s_at	LACTB2	lactamase, beta 2	-3.47541
	221861_at			-19.6313		201118_at	PGD	phosphogluconate dehydrogenase	-3.48735
	211668_s_at	PLAU	plasminogen activator, urokinase	-22.8222		212807_s_at	SORT1	sortilin 1	-3.4884
	238604_at			-29.2297		208655_at	CCNI	cyclin I	-3.48932
	223912_s_at	CLN8	ceroid-lipofuscinosis, neuronal 8 (epilepsy, progressive with mental retardation)	-72.8575		209459_s_at	ABAT	4-aminobutyrate aminotransferase	-3.49313
						212946_at	RP11-125A7.3	KIAA0564 protein	-3.49371
						204034_at	ETHE1	ethylmalonic encephalopathy 1	-3.4938
						228578_at	RBM45	RNA binding motif protein 45	-3.49954
						200715_x_at	RPL13A	ribosomal protein L13a	-3.4996
						223037_at	PDZD11	PDZ domain containing 11	-3.50087
						202699_s_at	TMEM63A	transmembrane protein 63A	-3.5024
						221196_x_at	BRCC3	BRCA1/BRCA2-containing complex, subunit 3	-3.50988
						210644_s_at	LAIR1	leukocyte-associated immunoglobulin-like receptor 1	-3.51743
						219680_at	NLRX1	NLR family member X1	-3.51879
						209845_at	MKRN1	makorin, ring finger protein, 1	-3.51959
						202174_s_at	PCM1	pericentriolar material 1	-3.52232
						224932_at	C22orf16	chromosome 22 open reading frame 16	-3.52636
						218460_at	HEATR2	HEAT repeat containing 2	-3.52914
						218303_x_at	KRCC1	lysine-rich coiled-coil 1	-3.53238
						226254_s_at	KIAA1430	KIAA1430	-3.53579
						209180_at	RABGGTB	Rab geranylgeranyltransferase, beta subunit	-3.54238
						214054_at	DOK2	docking protein 2, 56kDa	-3.54294
						233568_x_at	CWF19L1	CWF19-like 1, cell cycle control (S. pombe)	-3.54766
						202158_s_at	CUGBP2	CUG triplet repeat, RNA binding protein 2	-3.55678
						203405_at	DSCR2	Down syndrome critical region gene 2	-3.56353
						203388_at	ARRB2	arrestin, beta 2	-3.56531
						205351_at	GGCX	gamma-glutamyl carboxylase	-3.56633
						218167_at	AMZ2	archaemetzincins-2	-3.57066
						213428_s_at	COL6A1	collagen, type VI, alpha 1	-3.57928
						224451_x_at	ARHGAP9	Rho GTPase activating protein 9	-3.57938
						219342_at	CASD1	CAS1 domain containing 1	-3.58469
						204024_at	OSGIN2	oxidative stress induced growth inhibitor family member 2	-3.59094
						200783_s_at	STMN1	stathmin 1/oncoprotein 18	-3.59438
						224835_at	RP5-1022P6.2	hypothetical protein KIAA1434	-3.59534
						219082_at	AMDHD2	amidohydrolase domain containing 2	-3.59557
						204984_at	GPC4	glypican 4	-3.59925
						203232_s_at	ATXN1	ataxin 1	-3.59996
						211653_x_at	AKR1C2	aldo-keto reductase family 1, member C2 (dihydrodiol dehydrogenase 2; bile acid binding protein; 3-alpha hydroxysteroid dehydrogenase, type III)	-3.60318
						203767_s_at	STS	steroid sulfatase (microsomal), isozyme S	-3.60403
						201707_at	PEX19	peroxisomal biogenesis factor 19	-3.61091
						226422_at	ERGIC2	ERGIC and golgi 2	-3.61196
						228077_at	MGC3207	hypothetical protein MGC3207	-3.61441
						225554_s_at	ANAPC7	anaphase promoting complex subunit 7	-3.61726
						219452_at	DPEP2	dipeptidase 2	-3.62515
						1555522_s_at	MEMO1	mediator of cell motility 1	-3.62548
						225725_at			-3.6288
						219481_at	TTC13	tetratricopeptide repeat domain 13	-3.633
						222258_s_at	SH3BP4	SH3-domain binding protein 4	-3.63336
						209276_s_at	GLRX	glutaredoxin (thioltransferase)	-3.63879
						213817_at			-3.63945
						227865_at	C9orf103	chromosome 9 open reading frame 103	-3.64046
						226453_at	RNASEH2C	ribonuclease H2, subunit C	-3.6428
						204690_at	STX8	syntaxin 8	-3.64714
						231727_s_at	MIF4GD	MIF4G domain containing	-3.64733
						203831_at	R3HDM2	R3H domain containing 2	-3.65069
						200832_s_at	SCD	stearoyl-CoA desaturase (delta-9-desaturase)	-3.65661
						209760_at	KIAA0922	KIAA0922	-3.65886
						206472_s_at	TLE3	transducin-like enhancer of split 3 (E(sp1) homolog, Drosophila)	-3.65988
						208848_at	ADH5	alcohol dehydrogenase 5 (class III), chi polypeptide	-3.65998
						219654_at	PTPLA	protein tyrosine phosphatase-like (proline instead of catalytic arginine), member A	-3.66754
						202565_s_at	SVIL	supervillin	-3.66756
						209113_s_at	HMG20B	high-mobility group 20B	-3.67728
						226438_at	MTBP	Mdm2, transformed 3T3 cell double minute 2, p53 binding protein (mouse) binding protein, 104kDa	-3.68128
						221893_s_at	ADCK2	aarF domain containing kinase 2	-3.68169
						202983_at	HLTF	helicase-like transcription factor	-3.68297
						222759_at	SUV420H1	suppressor of variegation 4-20 homolog 1 (Drosophila)	-3.68519
						1555037_a_at	IDH1	isocitrate dehydrogenase 1 (NADP+), soluble	-3.68574
						220690_s_at	DHRS7B	dehydrogenase/reductase (SDR family) member 7B	-3.69302
						203860_at	PCCA	propionyl Coenzyme A carboxylase, alpha polypeptide	-3.69468
						200883_at	UQCRC2	ubiquinol-cytochrome c reductase core protein II	-3.70543
						213224_s_at	LOC92482	hypothetical protein LOC92482	-3.71701
						212652_s_at	SNX4	sorting nexin 4	-3.71902
						235696_at			-3.73228
						217837_s_at	VPS24	vacuolar protein sorting 24 homolog (S. cerevisiae)	-3.7357
						227897_at	RAP2B	RAP2B, member of RAS oncogene family	-3.73774
						228479_at			-3.74835
						200657_at	SLC25A5	solute carrier family 25 (mitochondrial carrier; adenine nucleotide translocator), member 5	-3.75268
						227322_s_at	BCCIP	BRCA2 and CDKN1A interacting protein	-3.75612
						203535_at	S100A9	S100 calcium binding protein A9	-3.75828
						221879_at	CALML4	calmodulin-like 4	-3.75951
						200615_s_at	AP2B1	adaptor-related protein complex 2, beta 1 subunit	-3.77588
						231928_at	HES2	hairy and enhancer of split 2 (Drosophila)	-3.77757
						220615_s_at	MLSTD1	male sterility domain containing 1	-3.78584
						210510_s_at	NRP1	neuropilin 1	-3.78929
						212040_at	TGOLN2	trans-golgi network protein 2	-3.79181
						205404_at	HSD11B1	hydroxysteroid (11-beta) dehydrogenase 1	-3.7938
						205920_at	SLC6A6	solute carrier family 6 (neurotransmitter transporter, taurine), member 6	-3.82106
						202784_s_at	NNT	nicotinamide nucleotide transhydrogenase	-3.82109
						225556_at	LOC203547	hypothetical protein LOC203547	-3.82112
						235396_at	C22orf25	chromosome 22 open reading frame 25	-3.82649
						229606_at			-3.82741
						220587_s_at	GBL	G protein beta subunit-like	-3.82766
						209177_at	C3orf60	chromosome 3 open reading frame 60	-3.83543
						200696_s_at	GSN	gelsolin (amyloidosis, Finnish type)	-3.83817
						212539_at	CHD1L	chromodomain helicase DNA binding protein 1-like	-3.85607
						201307_at	SEPT11	septin 11	-3.86473
						204146_at	RAD51AP1	RAD51 associated protein 1	-3.86586
						228391_at	CYP4V2	cytochrome P450, family 4, subfamily V, polypeptide 2	-3.87448
						201059_at	CTTN	cortactin	-3.87798
						212499_s_at	C14orf32	chromosome 14 open reading frame 32	-3.88149
						226668_at	WDSUB1	WD repeat, sterile alpha motif and U-box domain containing 1	-3.88337
						231835_at	C1orf93	chromosome 1 open reading frame 93	-3.89345
						229498_at			-3.89379
						223804_s_at	THUMPD3	THUMP domain containing 3	-3.89537
						202263_at	CYB5R1	cytochrome b5 reductase 1	-3.90531
						204417_at	GALC	galactosylceramidase	-3.90672
						235798_at			-3.91009
						225603_s_at			-3.9416
						37965_at	PARVB	parvin, beta	-3.94409
						227276_at	PLXDC2	plexin domain containing 2	-3.95157
						210102_at	LOH11CR2A	loss of heterozygosity, 11, chromosomal region 2, gene A	-3.95496
						204702_s_at	NFE2L3	nuclear factor (erythroid-derived 2)-like 3	-3.95574
						227579_at			-3.9573
						202785_at	NDUFA7	NADH dehydrogenase (ubiquinone) 1 alpha subcomplex, 7, 14.5kDa	-3.96901
						202867_s_at	DNAJB12	DnaJ (Hsp40) homolog, subfamily B, member 12	-3.96935
						52159_at	HEMK1	HemK methyltransferase family member 1	-3.97194
						203329_at	PTPRM	protein tyrosine phosphatase, receptor type, M	-3.98429
						204923_at	CXorf9	chromosome X open reading frame 9	-3.98474
						212228_s_at	COQ9	coenzyme Q9 homolog (S. cerevisiae)	-3.98504
						201743_at	CD14	CD14 molecule	-3.98652
						211615_s_at	LRPPRC	leucine-rich PPR-motif containing	-3.98846
						227117_at			-3.99454
						209817_at	PPP3CB	protein phosphatase 3 (formerly 2B), catalytic subunit, beta isoform	-4.01079
						230925_at	APBB1IP	amyloid beta (A4) precursor protein-binding, family B, member 1 interacting protein	-4.01237
						212632_at	STX7	syntaxin 7	-4.01319
						1556285_s_at	PPA2	pyrophosphatase (inorganic) 2	-4.01641
						239069_s_at			-4.01976
						224959_at	SLC26A2	solute carrier family 26 (sulfate transporter), member 2	-4.02104
						219628_at	ZMAT3	zinc finger, matrin type 3	-4.0218
						204238_s_at	C6orf108	chromosome 6 open reading frame 108	-4.02295
						203880_at	COX17	COX17 cytochrome c oxidase assembly homolog (S. cerevisiae)	-4.02379
						216308_x_at	GRHPR	glyoxylate reductase/hydroxypyruvate reductase	-4.02993
						212690_at	DDHD2	DDHD domain containing 2	-4.03565
						218145_at	TRIB3	tribbles homolog 3 (Drosophila)	-4.04729
						202239_at	PARP4	poly (ADP-ribose) polymerase family, member 4	-4.05516
						202697_at	NUDT21	nudix (nucleoside diphosphate linked moiety X)-type motif 21	-4.06156
						225365_at	ZDHHC20	zinc finger, DHHC-type containing 20	-4.06635
						226150_at	PPAPDC1B	phosphatidic acid phosphatase type 2 domain containing 1B	-4.07098
						215464_s_at	TAX1BP3	Tax1 (human T-cell leukemia virus type I) binding protein 3	-4.0847
						207808_s_at	PROS1	protein S (alpha)	-4.0887
						235005_at	DIS3L	DIS3 mitotic control homolog (S. cerevisiae)-like	-4.0907
						203124_s_at	SLC11A2	solute carrier family 11 (proton-coupled divalent metal ion transporters), member 2	-4.09361
						218673_s_at	ATG7	ATG7 autophagy related 7 homolog (S. cerevisiae)	-4.09491
						213475_s_at	ITGAL	integrin, alpha L (antigen CD11A (p180), lymphocyte function-associated antigen 1; alpha polypeptide)	-4.09556
						51200_at	C19orf60	chromosome 19 open reading frame 60	-4.09573
						210046_s_at	IDH2	isocitrate dehydrogenase 2 (NADP+), mitochondrial	-4.10814
						202032_s_at	MAN2A2	mannosidase, alpha, class 2A, member 2	-4.11111
						201954_at	ARPC1B	actin related protein 2/3 complex, subunit 1B, 41kDa	-4.11386
						1554077_a_at	TMEM53	transmembrane protein 53	-4.11467
						222686_s_at	FLJ11151	hypothetical protein FLJ11151	-4.11478
						227438_at	ALPK1	alpha-kinase 1	-4.12007
						223422_s_at	ARHGAP24	Rho GTPase activating protein 24	-4.12724
						212224_at	ALDH1A1	aldehyde dehydrogenase 1 family, member A1	-4.13461
						217808_s_at	MAPKAP1	mitogen-activated protein kinase associated protein 1	-4.14077
						228605_at			-4.14281
						229983_at	TIGD2	tigger transposable element derived 2	-4.15047
						218034_at	FIS1	fission 1 (mitochondrial outer membrane) homolog (S. cerevisiae)	-4.16736
						202104_s_at	SPG7	spastic paraplegia 7 (pure and complicated autosomal recessive)	-4.16997
						224494_x_at	HSD17B14	hydroxysteroid (17-beta) dehydrogenase 14	-4.1704
						232687_at			-4.17147
						204552_at			-4.17159
						231896_s_at	DENR	density-regulated protein	-4.17279
						211933_s_at	HNRPA3	heterogeneous nuclear ribonucleoprotein A3	-4.17392
						216250_s_at	LPXN	leupaxin	-4.17612
						229746_x_at	CEBPZ	CCAAT/enhancer binding protein zeta	-4.17732
						219858_s_at	FLJ20160	FLJ20160 protein	-4.18181
						204985_s_at	TRAPPC6A	trafficking protein particle complex 6A	-4.18668
						1554479_a_at	CARD8	caspase recruitment domain family, member 8	-4.18887
						225600_at	LOC286144	hypothetical protein LOC286144	-4.1905
						212954_at	DYRK4	dual-specificity tyrosine-(Y)-phosphorylation regulated kinase 4	-4.1939
						204119_s_at	ADK	adenosine kinase	-4.1959
						208663_s_at	TTC3	tetratricopeptide repeat domain 3	-4.19894
						201284_s_at	APEH	N-acylaminoacyl-peptide hydrolase	-4.20076
						222742_s_at	RABL5	RAB, member RAS oncogene family-like 5	-4.20391
						205538_at	CORO2A	coronin, actin binding protein, 2A	-4.20541
						209233_at	EMG1	EMG1 nucleolar protein homolog (S. cerevisiae)	-4.21157
						226050_at	TMCO3	transmembrane and coiled-coil domains 3	-4.21515
						201968_s_at	PGM1	phosphoglucomutase 1	-4.22039
						219467_at	GIN1	gypsy retrotransposon integrase 1	-4.22647
						202337_at	PMF1	polyamine-modulated factor 1	-4.24879
						219603_s_at	ZNF226	zinc finger protein 226	-4.2573
						226372_at	CHST11	carbohydrate (chondroitin 4) sulfotransferase 11	-4.25895
						225073_at	PPHLN1	periphilin 1	-4.26036
						212510_at	GPD1L	glycerol-3-phosphate dehydrogenase 1-like	-4.26421
						222386_s_at	COPZ1	coatomer protein complex, subunit zeta 1	-4.2682
						221782_at	DNAJC10	DnaJ (Hsp40) homolog, subfamily C, member 10	-4.26845
						202447_at	DECR1	2,4-dienoyl CoA reductase 1, mitochondrial	-4.2687
						229410_at	PAEP	progestagen-associated endometrial protein (placental protein 14, pregnancy-associated endometrial alpha-2-globulin, alpha uterine protein)	-4.27638
						218412_s_at	GTF2IRD1	GTF2I repeat domain containing 1	-4.27696
						221510_s_at	GLS	glutaminase	-4.27776
						219865_at	HSPC157	HSPC157 protein	-4.27927
						222530_s_at	MKKS	McKusick-Kaufman syndrome	-4.28637
						236217_at	SLC31A1	solute carrier family 31 (copper transporters), member 1	-4.29082
						226825_s_at	TMEM165	transmembrane protein 165	-4.29765
						204867_at	GCHFR	GTP cyclohydrolase I feedback regulator	-4.32111
						1557458_s_at	SHB	Src homology 2 domain containing adaptor protein B	-4.32246
						33778_at	TBC1D22A	TBC1 domain family, member 22A	-4.32558
						235593_at	ZEB2	zinc finger E-box binding homeobox 2	-4.33989
						225007_at			-4.34423
						218153_at	CARS2	cysteinyl-tRNA synthetase 2, mitochondrial (putative)	-4.34996
						239377_at	MGC11102	hypothetical protein MGC11102	-4.36211
						224952_at	TANC2	tetratricopeptide repeat, ankyrin repeat and coiled-coil containing 2	-4.36829
						203711_s_at	HIBCH	3-hydroxyisobutyryl-Coenzyme A hydrolase	-4.36847
						238021_s_at	hCG_1815491	hCG1815491	-4.38619
						202364_at	MXI1	MAX interactor 1	-4.38826
						228532_at	C1orf162	chromosome 1 open reading frame 162	-4.39623
						1563111_a_at	PIGX	phosphatidylinositol glycan anchor biosynthesis, class X	-4.3973
						212694_s_at	PCCB	propionyl Coenzyme A carboxylase, beta polypeptide	-4.40091
						218877_s_at	TRMT11	tRNA methyltransferase 11 homolog (S. cerevisiae)	-4.40396
						223441_at	SLC17A5	solute carrier family 17 (anion/sugar transporter), member 5	-4.40428
						224990_at	C4orf34	chromosome 4 open reading frame 34	-4.43725
						212672_at	ATM	ataxia telangiectasia mutated	-4.44908
						203980_at	FABP4	fatty acid binding protein 4, adipocyte	-4.45281
						235215_at			-4.45349
						222637_at	COMMD10	COMM domain containing 10	-4.45375
						239135_at			-4.47201
						214091_s_at	GPX3	glutathione peroxidase 3 (plasma)	-4.4778
						227778_at	KIAA1833	hypothetical protein KIAA1833	-4.48113
						220934_s_at	MGC3196	hypothetical protein MGC3196	-4.48557
						222750_s_at	SRD5A2L	steroid 5 alpha-reductase 2-like	-4.48734
						225441_x_at	LSMD1	LSM domain containing 1	-4.49403
						218323_at	RHOT1	ras homolog gene family, member T1	-4.4943
						235109_at			-4.50211
						224452_s_at	MGC12966	hypothetical protein LOC84792	-4.50485
						204883_s_at	HUS1	HUS1 checkpoint homolog (S. pombe)	-4.50704
						59644_at	BMP2K	BMP2 inducible kinase	-4.50719
						229693_at	LOC388335	similar to RIKEN cDNA A730055C05 gene	-4.51387
						225019_at	CAMK2D	calcium/calmodulin-dependent protein kinase (CaM kinase) II delta	-4.51492
						225101_s_at	SNX14	sorting nexin 14	-4.52793
						223279_s_at	UACA	uveal autoantigen with coiled-coil domains and ankyrin repeats	-4.52889
						208997_s_at	UCP2	uncoupling protein 2 (mitochondrial, proton carrier)	-4.53056
						221532_s_at	WDR61	WD repeat domain 61	-4.53856
						228106_at	C4orf30	chromosome 4 open reading frame 30	-4.54171
						225545_at	EEF2K	eukaryotic elongation factor-2 kinase	-4.5485
						204663_at	ME3	malic enzyme 3, NADP(+)-dependent, mitochondrial	-4.55346
						207438_s_at	SNUPN	snurportin 1	-4.55382
						201397_at	PHGDH	phosphoglycerate dehydrogenase	-4.55503
						201080_at	PIP4K2B	phosphatidylinositol-5-phosphate 4-kinase, type II, beta	-4.55532
						223241_at	SNX8	sorting nexin 8	-4.55815
						203629_s_at	COG5	component of oligomeric golgi complex 5	-4.56115
						229285_at	RNASEL	ribonuclease L (2',5'-oligoisoadenylate synthetase-dependent)	-4.57099
						220917_s_at	WDR19	WD repeat domain 19	-4.58382
						230259_at	C10orf125	chromosome 10 open reading frame 125	-4.5884
						229394_s_at	GRLF1	glucocorticoid receptor DNA binding factor 1	-4.58988
						225407_at	MBP	myelin basic protein	-4.59605
						210075_at	C3HC42	membrane-associated ring finger (C3HC4) 2	-4.59639
						218844_at	FLJ20920	hypothetical protein FLJ20920	-4.60452
						218376_s_at	MICAL1	microtubule associated monoxygenase, calponin and LIM domain containing 1	-4.60618
						242786_at	MYST2	MYST histone acetyltransferase 2	-4.6127
						209009_at	ESD	esterase D/formylglutathione hydrolase	-4.61321
						226013_at	TRAK1	trafficking protein, kinesin binding 1	-4.62054
						226760_at	LOC203411	hypothetical protein LOC203411	-4.62174
						223328_at	ARMC10	armadillo repeat containing 10	-4.63948
						227970_at	GPR157	G protein-coupled receptor 157	-4.6404
						239598_s_at	AYTL1	acyltransferase like 1	-4.64119
						212162_at	KIDINS220	kinase D-interacting substrate of 220 kDa	-4.66944
						1557411_s_at	SLC25A43	solute carrier family 25, member 43	-4.66957
						210896_s_at	ASPH	aspartate beta-hydroxylase	-4.69261
						227012_at	SLC25A40	solute carrier family 25, member 40	-4.70043
						224435_at	C10orf58	chromosome 10 open reading frame 58	-4.71179
						208858_s_at	FAM62A	family with sequence similarity 62 (C2 domain containing), member A	-4.71268
						1553954_at	ALG14	asparagine-linked glycosylation 14 homolog (S. cerevisiae)	-4.71729
						212552_at	HPCAL1	hippocalcin-like 1	-4.72073
						213478_at	KIAA1026	kazrin	-4.72322
						204091_at	PDE6D	phosphodiesterase 6D, cGMP-specific, rod, delta	-4.73479
						225297_at	CCDC5	coiled-coil domain containing 5 (spindle associated)	-4.74917
						228415_at			-4.75545
						226074_at	PPM1M	protein phosphatase 1M (PP2C domain containing)	-4.77051
						226348_at			-4.78649
						205036_at	LSM6	LSM6 homolog, U6 small nuclear RNA associated (S. cerevisiae)	-4.78767
						224996_at	RLBP1L1	retinaldehyde binding protein 1-like 1	-4.78859
						222640_at	DNMT3A	DNA (cytosine-5-)-methyltransferase 3 alpha	-4.79178
						219007_at	NUP43	nucleoporin 43kDa	-4.79378
						203387_s_at	TBC1D4	TBC1 domain family, member 4	-4.80448
						205891_at	ADORA2B	adenosine A2b receptor	-4.80508
						221581_s_at	LAT2	linker for activation of T cells family, member 2	-4.81251
						228315_at			-4.82371
						218031_s_at	FOXN3	forkhead box N3	-4.83494
						213220_at	LOC92482	hypothetical protein LOC92482	-4.84472
						202990_at	PYGL	phosphorylase, glycogen; liver (Hers disease, glycogen storage disease type VI)	-4.84504
						208998_at	UCP2	uncoupling protein 2 (mitochondrial, proton carrier)	-4.84906
						223318_s_at	ALKBH7	alkB, alkylation repair homolog 7 (E. coli)	-4.84942
						219797_at	MGAT4A	mannosyl (alpha-1,3-)-glycoprotein beta-1,4-N-acetylglucosaminyltransferase, isozyme A	-4.85055
						231968_at			-4.85089
						204671_s_at	ANKRD6	ankyrin repeat domain 6	-4.85746
						223114_at	COQ5	coenzyme Q5 homolog, methyltransferase (S. cerevisiae)	-4.86705
						212880_at	WDR7	WD repeat domain 7	-4.87271
						212816_s_at	CBS	cystathionine-beta-synthase	-4.87859
						222427_s_at	LARS	leucyl-tRNA synthetase	-4.88064
						221042_s_at	CLMN	calmin (calponin-like, transmembrane)	-4.8912
						202241_at	TRIB1	tribbles homolog 1 (Drosophila)	-4.9067
						1554093_a_at	SNAPC5	small nuclear RNA activating complex, polypeptide 5, 19kDa	-4.90672
						239161_at	FDX1	ferredoxin 1	-4.91971
						225113_at	AGPS	alkylglycerone phosphate synthase	-4.92628
						214934_at	ATP9B	ATPase, Class II, type 9B	-4.92844
						210112_at	HPS1	Hermansky-Pudlak syndrome 1	-4.93888
						203335_at	PHYH	phytanoyl-CoA 2-hydroxylase	-4.94959
						202862_at	FAH	fumarylacetoacetate hydrolase (fumarylacetoacetase)	-4.95184
						221584_s_at	KCNMA1	potassium large conductance calcium-activated channel, subfamily M, alpha member 1	-4.95609
						220935_s_at	CDK5RAP2	CDK5 regulatory subunit associated protein 2	-4.9616
						205140_at	FPGT	fucose-1-phosphate guanylyltransferase	-4.97387
						207071_s_at	ACO1	aconitase 1, soluble	-4.9847
						226089_at	RABL3	RAB, member of RAS oncogene family-like 3	-4.99807
						205485_at	RYR1	ryanodine receptor 1 (skeletal)	-5.00588
						204215_at	C7orf23	chromosome 7 open reading frame 23	-5.03089
						213995_at	ATP5S	ATP synthase, H+ transporting, mitochondrial F0 complex, subunit s (factor B)	-5.03523
						228497_at	SLC22A15	solute carrier family 22 (organic cation transporter), member 15	-5.03678
						203906_at	IQSEC1	IQ motif and Sec7 domain 1	-5.03732
						203702_s_at	TTLL4	tubulin tyrosine ligase-like family, member 4	-5.04432
						219991_at	SLC2A9	solute carrier family 2 (facilitated glucose transporter), member 9	-5.04725
						202847_at	PCK2	phosphoenolpyruvate carboxykinase 2 (mitochondrial)	-5.04909
						225904_at	C1orf96	chromosome 1 open reading frame 96	-5.05376
						225173_at	ARHGAP18	Rho GTPase activating protein 18	-5.05405
						204082_at	PBX3	pre-B-cell leukemia homeobox 3	-5.08928
						209146_at	SC4MOL	sterol-C4-methyl oxidase-like	-5.09102
						205206_at	KAL1	Kallmann syndrome 1 sequence	-5.10457
						204240_s_at	SMC2	structural maintenance of chromosomes 2	-5.11013
						221666_s_at	PYCARD	PYD and CARD domain containing	-5.11757
						238455_at			-5.12021
						217792_at	SNX5	sorting nexin 5	-5.1473
						220201_at	RC3H2	ring finger and CCCH-type zinc finger domains 2	-5.1479
						211795_s_at	FYB	FYN binding protein (FYB-120/130)	-5.15861
						232946_s_at	NADSYN1	NAD synthetase 1	-5.16135
						213160_at	DOCK2	dedicator of cytokinesis 2	-5.17235
						203774_at	MTR	5-methyltetrahydrofolate-homocysteine methyltransferase	-5.18058
						225665_at	ZAK	sterile alpha motif and leucine zipper containing kinase AZK	-5.18093
						225646_at	CTSC	cathepsin C	-5.18653
						208982_at	PECAM1	platelet/endothelial cell adhesion molecule (CD31 antigen)	-5.2099
						213017_at	ABHD3	abhydrolase domain containing 3	-5.21048
						224812_at	HIBADH	3-hydroxyisobutyrate dehydrogenase	-5.21494
						1553432_s_at	OTOA	otoancorin	-5.21577
						219681_s_at	RAB11FIP1	RAB11 family interacting protein 1 (class I)	-5.22835
						213379_at	COQ2	coenzyme Q2 homolog, prenyltransferase (yeast)	-5.23325
						228745_at	SGTB	small glutamine-rich tetratricopeptide repeat (TPR)-containing, beta	-5.25103
						209935_at	ATP2C1	ATPase, Ca++ transporting, type 2C, member 1	-5.25904
						218298_s_at	C14orf159	chromosome 14 open reading frame 159	-5.25945
						204072_s_at	FRY	furry homolog (Drosophila)	-5.26156
						227356_at	TMCC1	transmembrane and coiled-coil domain family 1	-5.28672
						202053_s_at	ALDH3A2	aldehyde dehydrogenase 3 family, member A2	-5.29382
						218383_at	C14orf94	chromosome 14 open reading frame 94	-5.29395
						227420_at	TNFAIP8L1	tumor necrosis factor, alpha-induced protein 8-like 1	-5.31988
						206790_s_at	NDUFB1	NADH dehydrogenase (ubiquinone) 1 beta subcomplex, 1, 7kDa	-5.32941
						225197_at	C16orf72	chromosome 16 open reading frame 72	-5.34529
						208944_at	TGFBR2	transforming growth factor, beta receptor II (70/80kDa)	-5.37681
						227442_at	COX18	COX18 cytochrome c oxidase assembly homolog (S. cerevisiae)	-5.37906
						228771_at	ADRBK2	adrenergic, beta, receptor kinase 2	-5.38697
						213727_x_at	MPPE1	metallophosphoesterase 1	-5.39909
						213129_s_at	LOC730107	similar to Glycine cleavage system H protein, mitochondrial precursor	-5.40493
						225522_at	AAK1	AP2 associated kinase 1	-5.42206
						202971_s_at	DYRK2	dual-specificity tyrosine-(Y)-phosphorylation regulated kinase 2	-5.43543
						225285_at	BCAT1	branched chain aminotransferase 1, cytosolic	-5.4359
						212912_at	RPS6KA2	ribosomal protein S6 kinase, 90kDa, polypeptide 2	-5.44014
						238756_at	MTPN	myotrophin	-5.4416
						204039_at	CEBPA	CCAAT/enhancer binding protein (C/EBP), alpha	-5.44576
						221156_x_at	CCPG1	cell cycle progression 1	-5.44811
						216944_s_at	ITPR1	inositol 1,4,5-triphosphate receptor, type 1	-5.4495
						204744_s_at	IARS	isoleucyl-tRNA synthetase	-5.48161
						200862_at	DHCR24	24-dehydrocholesterol reductase	-5.48426
						225214_at	PSMB7	proteasome (prosome, macropain) subunit, beta type, 7	-5.50035
						226616_s_at	NDUFV3	NADH dehydrogenase (ubiquinone) flavoprotein 3, 10kDa	-5.50467
						219289_at	HEATR3	HEAT repeat containing 3	-5.51444
						217906_at	KLHDC2	kelch domain containing 2	-5.52636
						218557_at	NIT2	nitrilase family, member 2	-5.53565
						206060_s_at	PTPN22	protein tyrosine phosphatase, non-receptor type 22 (lymphoid)	-5.55302
						1553978_at	MEF2B	myocyte enhancer factor 2B	-5.55487
						201816_s_at	GBAS	glioblastoma amplified sequence	-5.56322
						212230_at	PPAP2B	phosphatidic acid phosphatase type 2B	-5.56911
						1559591_s_at	CHDH	choline dehydrogenase	-5.5692
						232798_at	DNAJC5B	DnaJ (Hsp40) homolog, subfamily C, member 5 beta	-5.57185
						209734_at	NCKAP1L	NCK-associated protein 1-like	-5.59392
						226106_at	RNF141	ring finger protein 141	-5.61526
						1552256_a_at	SCARB1	scavenger receptor class B, member 1	-5.62578
						227948_at	FGD4	FYVE, RhoGEF and PH domain containing 4	-5.62696
						219697_at	HS3ST2	heparan sulfate (glucosamine) 3-O-sulfotransferase 2	-5.63015
						218637_at	IMPACT	Impact homolog (mouse)	-5.63221
						235142_at	ZBTB8	zinc finger and BTB domain containing 8	-5.6331
						203723_at	ITPKB	inositol 1,4,5-trisphosphate 3-kinase B	-5.63448
						212026_s_at	EXOC7	exocyst complex component 7	-5.6415
						213305_s_at	PPP2R5C	protein phosphatase 2, regulatory subunit B', gamma isoform	-5.65021
						217122_s_at	LOC728661	similar to solute carrier family 35, member E2	-5.65079
						225338_at	ZYG11B	zyg-11 homolog B (C. elegans)	-5.65095
						221019_s_at	COLEC12	collectin sub-family member 12	-5.65469
						1555886_at	PDSS2	prenyl (decaprenyl) diphosphate synthase, subunit 2	-5.66961
						202481_at	DHRS3	dehydrogenase/reductase (SDR family) member 3	-5.67211
						225579_at	PQLC3	PQ loop repeat containing 3	-5.67779
						203435_s_at	MME	membrane metallo-endopeptidase	-5.6805
						225710_at	GNB4	guanine nucleotide binding protein (G protein), beta polypeptide 4	-5.71135
						206420_at	IGSF6	immunoglobulin superfamily, member 6	-5.72285
						214500_at	H2AFY	H2A histone family, member Y	-5.72405
						203549_s_at	LPL	lipoprotein lipase	-5.73553
						221900_at	COL8A2	collagen, type VIII, alpha 2	-5.74627
						203173_s_at	MGC16824	esophageal cancer associated protein	-5.75606
						203582_s_at	RAB4A	RAB4A, member RAS oncogene family	-5.76815
						223004_s_at	C3orf1	chromosome 3 open reading frame 1	-5.77627
						235568_at	TRAPPC5	trafficking protein particle complex 5	-5.78679
						219547_at	COX15	COX15 homolog, cytochrome c oxidase assembly protein (yeast)	-5.78721
						204774_at	EVI2A	ecotropic viral integration site 2A	-5.79732
						227280_s_at	CCNYL1	cyclin Y-like 1	-5.79936
						204143_s_at	ENOSF1	enolase superfamily member 1	-5.80387
						203640_at	MBNL2	muscleblind-like 2 (Drosophila)	-5.80388
						212314_at	KIAA0746	KIAA0746 protein	-5.81459
						212778_at	PACS2	phosphofurin acidic cluster sorting protein 2	-5.81586
						208158_s_at	OSBPL1A	oxysterol binding protein-like 1A	-5.81956
						229126_at	TMEM19	transmembrane protein 19	-5.82056
						45288_at	ABHD6	abhydrolase domain containing 6	-5.82112
						238604_at			-5.8515
						224881_at	VKORC1L1	vitamin K epoxide reductase complex, subunit 1-like 1	-5.85849
						213463_s_at	KIAA0974	KIAA0974	-5.86618
						218721_s_at	C1orf27	chromosome 1 open reading frame 27	-5.87666
						212856_at	DIP	death-inducing-protein	-5.90159
						217838_s_at	EVL	Enah/Vasp-like	-5.90846
						225520_at	MTHFD1L	methylenetetrahydrofolate dehydrogenase (NADP+ dependent) 1-like	-5.92516
						204646_at	DPYD	dihydropyrimidine dehydrogenase	-5.94006
						225356_at			-5.95857
						218765_at	SIDT2	SID1 transmembrane family, member 2	-5.96689
						52169_at	LYK5	protein kinase LYK5	-5.97787
						226488_at	RCCD1	RCC1 domain containing 1	-5.98019
						203545_at	ALG8	asparagine-linked glycosylation 8 homolog (S. cerevisiae, alpha-1,3-glucosyltransferase)	-5.9828
						205042_at	GNE	glucosamine (UDP-N-acetyl)-2-epimerase/N-acetylmannosamine kinase	-5.98506
						220178_at	C19orf28	chromosome 19 open reading frame 28	-5.9867
						205743_at	STAC	SH3 and cysteine rich domain	-6.00119
						236769_at	LOC158402	hypothetical protein LOC158402	-6.01719
						201455_s_at	NPEPPS	aminopeptidase puromycin sensitive	-6.04264
						203682_s_at	IVD	isovaleryl Coenzyme A dehydrogenase	-6.06026
						203466_at	MPV17	MpV17 mitochondrial inner membrane protein	-6.06783
						204839_at	POP5	processing of precursor 5, ribonuclease P/MRP subunit (S. cerevisiae)	-6.07066
						231823_s_at	SH3PXD2B	SH3 and PX domains 2B	-6.08576
						218102_at	DERA	2-deoxyribose-5-phosphate aldolase homolog (C. elegans)	-6.09396
						201391_at	TRAP1	TNF receptor-associated protein 1	-6.10391
						231990_at	USP15	ubiquitin specific peptidase 15	-6.11006
						213119_at	SLC36A1	solute carrier family 36 (proton/amino acid symporter), member 1	-6.11138
						226381_at	PS1TP4	HBV preS1-transactivated protein 4	-6.1132
						218923_at	CTBS	chitobiase, di-N-acetyl-	-6.16093
						203402_at	KCNAB2	potassium voltage-gated channel, shaker-related subfamily, beta member 2	-6.16237
						200811_at	CIRBP	cold inducible RNA binding protein	-6.16446
						219013_at	GALNT11	UDP-N-acetyl-alpha-D-galactosamine:polypeptide N-acetylgalactosaminyltransferase 11 (GalNAc-T11)	-6.17444
						227158_at	C14orf126	chromosome 14 open reading frame 126	-6.17803
						217540_at			-6.18508
						225731_at	ANKRD50	ankyrin repeat domain 50	-6.21334
						224926_at	EXOC4	exocyst complex component 4	-6.23292
						224558_s_at	MALAT1	metastasis associated lung adenocarcinoma transcript 1 (non-coding RNA)	-6.23407
						227221_at			-6.26758
						223442_at	NICN1	nicolin 1	-6.27099
						76897_s_at	FKBP15	FK506 binding protein 15, 133kDa	-6.28969
						205248_at	DOPEY2	dopey family member 2	-6.33044
						227229_at			-6.34437
						220753_s_at	CRYL1	crystallin, lambda 1	-6.37471
						202742_s_at	PRKACB	protein kinase, cAMP-dependent, catalytic, beta	-6.38687
						235518_at	SLC8A1	solute carrier family 8 (sodium/calcium exchanger), member 1	-6.40835
						202822_at	LPP	LIM domain containing preferred translocation partner in lipoma	-6.42659
						214830_at	SLC38A6	solute carrier family 38, member 6	-6.44673
						226020_s_at	OMA1	OMA1 homolog, zinc metallopeptidase (S. cerevisiae)	-6.44895
						227094_at	DHTKD1	dehydrogenase E1 and transketolase domain containing 1	-6.44996
						224461_s_at	AIFM2	apoptosis-inducing factor, mitochondrion-associated, 2	-6.4581
						204438_at	MRC1	mannose receptor, C type 1	-6.46565
						218961_s_at	PNKP	polynucleotide kinase 3'-phosphatase	-6.47817
						212158_at	SDC2	syndecan 2	-6.4808
						214511_x_at	FCGR1B	Fc fragment of IgG, high affinity Ib, receptor (CD64)	-6.49303
						219385_at	SLAMF8	SLAM family member 8	-6.52735
						225129_at	CPNE2	copine II	-6.56056
						226978_at	PPARA	peroxisome proliferator-activated receptor alpha	-6.612
						205005_s_at	NMT2	N-myristoyltransferase 2	-6.61552
						226071_at	ADAMTSL4	ADAMTS-like 4	-6.61801
						210423_s_at	SLC11A1	solute carrier family 11 (proton-coupled divalent metal ion transporters), member 1	-6.69069
						218491_s_at	THYN1	thymocyte nuclear protein 1	-6.69203
						225274_at			-6.6975
						221539_at	EIF4EBP1	eukaryotic translation initiation factor 4E binding protein 1	-6.69879
						219944_at	CLIP4	CAP-GLY domain containing linker protein family, member 4	-6.72382
						226026_at	DIRC2	disrupted in renal carcinoma 2	-6.74276
						244352_at			-6.74838
						218373_at	AKTIP	AKT interacting protein	-6.76149
						202955_s_at	ARFGEF1	ADP-ribosylation factor guanine nucleotide-exchange factor 1(brefeldin A-inhibited)	-6.76225
						201906_s_at	CTDSPL	CTD (carboxy-terminal domain, RNA polymerase II, polypeptide A) small phosphatase-like	-6.79134
						1555790_a_at	FLJ38482	hypothetical protein FLJ38482	-6.8947
						203104_at	CSF1R	colony stimulating factor 1 receptor, formerly McDonough feline sarcoma viral (v-fms) oncogene homolog	-6.89648
						202942_at	ETFB	electron-transfer-flavoprotein, beta polypeptide	-6.94473
						201540_at	FHL1	four and a half LIM domains 1	-6.95996
						221035_s_at	TEX14	testis expressed 14	-6.97142
						1555905_a_at	C3orf23	chromosome 3 open reading frame 23	-6.98975
						202671_s_at	PDXK	pyridoxal (pyridoxine, vitamin B6) kinase	-7.0033
						226632_at	CYGB	cytoglobin	-7.01187
						226532_at	LZIC	leucine zipper and CTNNBIP1 domain containing	-7.02306
						223423_at	GPR160	G protein-coupled receptor 160	-7.05106
						201377_at	UBAP2L	ubiquitin associated protein 2-like	-7.05716
						205126_at	VRK2	vaccinia related kinase 2	-7.06647
						227046_at	SLC39A11	solute carrier family 39 (metal ion transporter), member 11	-7.07895
						218262_at	RMND5B	required for meiotic nuclear division 5 homolog B (S. cerevisiae)	-7.11819
						234303_s_at	GPR85	G protein-coupled receptor 85	-7.18681
						202848_s_at	GRK6	G protein-coupled receptor kinase 6	-7.19078
						203719_at	ERCC1	excision repair cross-complementing rodent repair deficiency, complementation group 1 (includes overlapping antisense sequence)	-7.20898
						222719_s_at	PDGFC	platelet derived growth factor C	-7.21887
						208771_s_at	LTA4H	leukotriene A4 hydrolase	-7.23698
						222603_at	ERMP1	endoplasmic reticulum metallopeptidase 1	-7.23703
						225908_at	IAH1	isoamyl acetate-hydrolyzing esterase 1 homolog (S. cerevisiae)	-7.27501
						218856_at	TNFRSF21	tumor necrosis factor receptor superfamily, member 21	-7.29126
						218018_at	PDXK	pyridoxal (pyridoxine, vitamin B6) kinase	-7.29556
						202973_x_at	FAM13A1	family with sequence similarity 13, member A1	-7.31191
						205052_at	AUH	AU RNA binding protein/enoyl-Coenzyme A hydratase	-7.34766
						223703_at	C10orf11	chromosome 10 open reading frame 11	-7.35837
						219344_at	SLC29A3	solute carrier family 29 (nucleoside transporters), member 3	-7.36603
						226936_at	C6orf173	chromosome 6 open reading frame 173	-7.36879
						219284_at	HSPBAP1	HSPB (heat shock 27kDa) associated protein 1	-7.37449
						240137_at	TDRD6	tudor domain containing 6	-7.37616
						219891_at	PGPEP1	pyroglutamyl-peptidase I	-7.39065
						224899_s_at	RP11-217H1.1	implantation-associated protein	-7.41658
						207907_at	TNFSF14	tumor necrosis factor (ligand) superfamily, member 14	-7.42464
						203485_at	RTN1	reticulon 1	-7.42466
						223231_at	TATDN1	TatD DNase domain containing 1	-7.42802
						203098_at	CDYL	chromodomain protein, Y-like	-7.4355
						207469_s_at	PIR	pirin (iron-binding nuclear protein)	-7.46901
						228274_at	SDSL	serine dehydratase-like	-7.48272
						214769_at			-7.5075
						226805_at	C20orf142	chromosome 20 open reading frame 142	-7.5373
						217990_at	GMPR2	guanosine monophosphate reductase 2	-7.59595
						215100_at	C6orf105	chromosome 6 open reading frame 105	-7.61401
						238462_at	STS-1	Cbl-interacting protein Sts-1	-7.63102
						218967_s_at	PTER	phosphotriesterase related	-7.66327
						216950_s_at	FCGR1A	Fc fragment of IgG, high affinity Ia, receptor (CD64)	-7.67232
						229119_s_at	ZSWIM7	zinc finger, SWIM-type containing 7	-7.67844
						225337_at	ABHD2	abhydrolase domain containing 2	-7.69467
						227782_at	ZBTB7C	zinc finger and BTB domain containing 7C	-7.75514
						228042_at	ADPRH	ADP-ribosylarginine hydrolase	-7.76425
						242465_at			-7.81758
						226347_at			-7.90663
						221802_s_at	KIAA1598	KIAA1598	-7.92018
						225639_at	SKAP2	src kinase associated phosphoprotein 2	-7.93724
						225859_at	BIRC4	baculoviral IAP repeat-containing 4	-7.94166
						223158_s_at	NEK6	NIMA (never in mitosis gene a)-related kinase 6	-7.98862
						208212_s_at	ALK	anaplastic lymphoma kinase (Ki-1)	-8.01188
						223053_x_at	SSU72	SSU72 RNA polymerase II CTD phosphatase homolog (S. cerevisiae)	-8.05254
						224818_at	SORT1	sortilin 1	-8.06866
						228759_at	CREB3L2	cAMP responsive element binding protein 3-like 2	-8.09521
						203979_at	CYP27A1	cytochrome P450, family 27, subfamily A, polypeptide 1	-8.11207
						201013_s_at	PAICS	phosphoribosylaminoimidazole carboxylase, phosphoribosylaminoimidazole succinocarboxamide synthetase	-8.11886
						213792_s_at			-8.19578
						228094_at	AMICA1	adhesion molecule, interacts with CXADR antigen 1	-8.20048
						1556698_a_at	GPRIN3	GPRIN family member 3	-8.27083
						228569_at	PAPOLA	poly(A) polymerase alpha	-8.29674
						235391_at	FAM92A1	family with sequence similarity 92, member A1	-8.34458
						210184_at	ITGAX	integrin, alpha X (complement component 3 receptor 4 subunit)	-8.34827
						232103_at	BPNT1	3'(2'), 5'-bisphosphate nucleotidase 1	-8.35906
						233540_s_at	CDK5RAP2	CDK5 regulatory subunit associated protein 2	-8.37996
						203940_s_at	VASH1	vasohibin 1	-8.38843
						223062_s_at	PSAT1	phosphoserine aminotransferase 1	-8.42664
						235349_at	FAM82A	family with sequence similarity 82, member A	-8.44827
						225836_s_at	C12orf32	chromosome 12 open reading frame 32	-8.54946
						219525_at	SLC47A1	solute carrier family 47, member 1	-8.58481
						1555812_a_at	ARHGDIB	Rho GDP dissociation inhibitor (GDI) beta	-8.58629
						204981_at	SLC22A18	solute carrier family 22 (organic cation transporter), member 18	-8.62297
						211742_s_at	EVI2B	ecotropic viral integration site 2B	-8.66508
						218545_at	CCDC91	coiled-coil domain containing 91	-8.68079
						226395_at	LOC286170	hypothetical protein LOC286170	-8.6991
						222150_s_at	tcag7.1314	hypothetical protein LOC54103	-8.78619
						235177_at	FAM119A	family with sequence similarity 119, member A	-8.79017
						222763_s_at	WDR33	WD repeat domain 33	-8.82113
						241068_at			-8.82297
						202134_s_at	WWTR1	WW domain containing transcription regulator 1	-8.85854
						212812_at	SERINC5	serine incorporator 5	-9.00117
						1554003_at	RGNEF	Rho-guanine nucleotide exchange factor	-9.02283
						213388_at	LOC727942	similar to phosphodiesterase 4D interacting protein isoform 2	-9.02852
						208130_s_at	TBXAS1	thromboxane A synthase 1 (platelet, cytochrome P450, family 5, subfamily A)	-9.0756
						218723_s_at	C13orf15	chromosome 13 open reading frame 15	-9.09505
						225609_at	GSR	glutathione reductase	-9.12712
						226382_at	LOC283070	hypothetical protein LOC283070	-9.13188
						238332_at	ANKRD29	ankyrin repeat domain 29	-9.13783
						216316_x_at	GK	glycerol kinase	-9.1631
						219895_at	FAM70A	family with sequence similarity 70, member A	-9.16349
						212845_at	SAMD4A	sterile alpha motif domain containing 4A	-9.20073
						203049_s_at	KIAA0372	KIAA0372	-9.23829
						203786_s_at	TPD52L1	tumor protein D52-like 1	-9.24313
						205844_at	VNN1	vanin 1	-9.31328
						224358_s_at	MS4A7	membrane-spanning 4-domains, subfamily A, member 7	-9.37978
						218705_s_at	SNX24	sorting nexin 24	-9.38204
						204058_at	ME1	malic enzyme 1, NADP(+)-dependent, cytosolic	-9.40822
						243099_at	NFAM1	NFAT activating protein with ITAM motif 1	-9.51339
						226423_at	PAQR8	progestin and adipoQ receptor family member VIII	-9.57787
						1552398_a_at	CLEC12A	C-type lectin domain family 12, member A	-9.59633
						224811_at			-9.61129
						226550_at			-9.62421
						208964_s_at	FADS1	fatty acid desaturase 1	-9.661
						203459_s_at	VPS16	vacuolar protein sorting 16 homolog (S. cerevisiae)	-9.73867
						209785_s_at	PLA2G4C	phospholipase A2, group IVC (cytosolic, calcium-independent)	-9.77264
						211569_s_at	HADH	hydroxyacyl-Coenzyme A dehydrogenase	-9.77597
						202552_s_at	CRIM1	cysteine rich transmembrane BMP regulator 1 (chordin-like)	-9.80237
						221589_s_at	ALDH6A1	aldehyde dehydrogenase 6 family, member A1	-9.81085
						223562_at	PARVG	parvin, gamma	-9.81919
						209696_at	FBP1	fructose-1,6-bisphosphatase 1	-9.8536
						225163_at	FRMD4A	FERM domain containing 4A	-9.87463
						1552553_a_at	NLRC4	NLR family, CARD domain containing 4	-9.99027
						222808_at	ALG13	asparagine-linked glycosylation 13 homolog (S. cerevisiae)	-10.032
						219386_s_at	SLAMF8	SLAM family member 8	-10.0515
						225081_s_at	CDCA7L	cell division cycle associated 7-like	-10.055
						203285_s_at	HS2ST1	heparan sulfate 2-O-sulfotransferase 1	-10.1221
						243606_at			-10.3546
						213357_at	GTF2H5	general transcription factor IIH, polypeptide 5	-10.4059
						205249_at	EGR2	early growth response 2 (Krox-20 homolog, Drosophila)	-10.4435
						203803_at	PCYOX1	prenylcysteine oxidase 1	-10.53
						225469_at	LYRM5	LYR motif containing 5	-10.5911
						1566766_a_at			-10.6849
						210942_s_at	ST3GAL6	ST3 beta-galactoside alpha-2,3-sialyltransferase 6	-10.711
						225086_at	FAM98B	family with sequence similarity 98, member B	-10.7655
						1553151_at	ATP6V0D2	ATPase, H+ transporting, lysosomal 38kDa, V0 subunit d2	-10.846
						240873_x_at	DAB2	disabled homolog 2, mitogen-responsive phosphoprotein (Drosophila)	-10.8991
						220305_at	MGC3260	hypothetical protein MGC3260	-10.9073
						219892_at	TM6SF1	transmembrane 6 superfamily member 1	-11.0125
						218321_x_at	STYXL1	serine/threonine/tyrosine interacting-like 1	-11.2071
						228710_at			-11.2569
						225225_at	KRTAP4-7	keratin associated protein 4-7	-11.2664
						207761_s_at	METTL7A	methyltransferase like 7A	-11.4439
						217297_s_at	MYO9B	myosin IXB	-11.6899
						226878_at	HLA-DOA	major histocompatibility complex, class II, DO alpha	-11.8156
						228543_at	CSRP2BP	CSRP2 binding protein	-11.8392
						203799_at	CD302	CD302 molecule	-11.8969
						229145_at	C10orf104	chromosome 10 open reading frame 104	-12.0397
						202662_s_at	ITPR2	inositol 1,4,5-triphosphate receptor, type 2	-12.1466
						218417_s_at	FLJ20489	hypothetical protein FLJ20489	-12.3219
						201430_s_at	DPYSL3	dihydropyrimidinase-like 3	-12.5173
						213733_at	MYO1F	myosin IF	-12.6053
						226120_at	TTC8	tetratricopeptide repeat domain 8	-12.8501
						201911_s_at	FARP1	FERM, RhoGEF (ARHGEF) and pleckstrin domain protein 1 (chondrocyte-derived)	-12.8819
						222317_at	PDE3B	phosphodiesterase 3B, cGMP-inhibited	-13.0228
						207085_x_at	CSF2RA	colony stimulating factor 2 receptor, alpha, low-affinity (granulocyte-macrophage)	-13.0281
						201416_at	SOX4	SRY (sex determining region Y)-box 4	-13.0554
						1560396_at	KLHL6	kelch-like 6 (Drosophila)	-13.2129
						232331_at	PPARG	peroxisome proliferator-activated receptor gamma	-13.2679
						204445_s_at	ALOX5	arachidonate 5-lipoxygenase	-13.2688
						227463_at	ACE	angiotensin I converting enzyme (peptidyl-dipeptidase A) 1	-13.4049
						228841_at	LYRM7	Lyrm7 homolog (mouse)	-13.5848
						209641_s_at	ABCC3	ATP-binding cassette, sub-family C (CFTR/MRP), member 3	-13.5897
						202201_at	BLVRB	biliverdin reductase B (flavin reductase (NADPH))	-13.9698
						206726_at	PGDS	prostaglandin D2 synthase, hematopoietic	-13.9699
						218857_s_at	ASRGL1	asparaginase like 1	-14.0822
						225808_at	LOC124512	hypothetical protein LOC124512	-14.1086
						230391_at			-14.1762
						229958_at	CLN8	ceroid-lipofuscinosis, neuronal 8 (epilepsy, progressive with mental retardation)	-14.338
						223503_at	TMEM163	transmembrane protein 163	-14.3532
						227647_at	KCNE3	potassium voltage-gated channel, Isk-related family, member 3	-14.4962
						209219_at	RDBP	RD RNA binding protein	-15.2503
						223696_at	ARSD	arylsulfatase D	-15.6083
						227052_at			-15.6162
						224989_at			-16.7169
						226728_at	SLC27A1	solute carrier family 27 (fatty acid transporter), member 1	-17.1083
						226865_at			-17.2531
						226841_at	MPEG1	macrophage expressed gene 1	-17.2641
						220380_at	DNASE2B	deoxyribonuclease II beta	-17.5281
						219947_at	CLEC4A	C-type lectin domain family 4, member A	-17.9669
						229383_at			-18.1103
						233651_s_at	MPND	MPN domain containing	-18.2546
						225040_s_at	RPE	ribulose-5-phosphate-3-epimerase	-19.0413
						227144_at	C22orf9	chromosome 22 open reading frame 9	-19.518
						224480_s_at	MAG1	lung cancer metastasis-associated protein	-19.6971
						229954_at			-20.5604
						205936_s_at	HK3	hexokinase 3 (white cell)	-21.394
						203914_x_at	HPGD	hydroxyprostaglandin dehydrogenase 15-(NAD)	-22.8426
						204565_at	THEM2	thioesterase superfamily member 2	-22.8476
						214719_at	SLC46A3	solute carrier family 46, member 3	-23.3255
						228791_at	C15orf38	chromosome 15 open reading frame 38	-23.8049
						227995_at			-24.6047
						224937_at	PTGFRN	prostaglandin F2 receptor negative regulator	-24.9964
						226495_at	VISA	virus-induced signaling adapter	-25.1431
						214770_at	MSR1	macrophage scavenger receptor 1	-25.1881
						232617_at	CTSS	cathepsin S	-26.897
						205611_at	TNFSF12	tumor necrosis factor (ligand) superfamily, member 12	-28.1038
						203126_at	IMPA2	inositol(myo)-1(or 4)-monophosphatase 2	-28.6832
						219574_at	C3HC41	membrane-associated ring finger (C3HC4) 1	-29.01
						221266_s_at	TM7SF4	transmembrane 7 superfamily member 4	-29.2764
						203473_at	SLCO2B1	solute carrier organic anion transporter family, member 2B1	-31.1297
						226116_at			-33.484
						235385_at			-34.3661
						228560_at	CACNA1D	calcium channel, voltage-dependent, L type, alpha 1D subunit	-35.4348
						1559067_a_at			-38.1982
						226751_at	C2orf32	chromosome 2 open reading frame 32	-39.5752
						242871_at	PAQR5	progestin and adipoQ receptor family member V	-57.6164
						232151_at			-63.2857
						230174_at	LYPLAL1	lysophospholipase-like 1	-63.433
						1555214_a_at	CLEC7A	C-type lectin domain family 7, member A	-121.892
